# Supplementary material for: Serum peptidome profiles immune response of COVID-19 Vaccine administration
Source: PubMed Central journal article supplement (PMC9450691; doi:10.3389/fimmu.2022.956369), 2022-08-24
Supplement: DataSheet_1.pdf [file DataSheet_1.pdf]

## *Supplementary Material*

### 1 Supplementary Data

Supplementary Dataset 1: The peak intensity matrix of all the samples.

### 2 Supplementary Figures and Tables

#### 2.1 Supplementary Figures

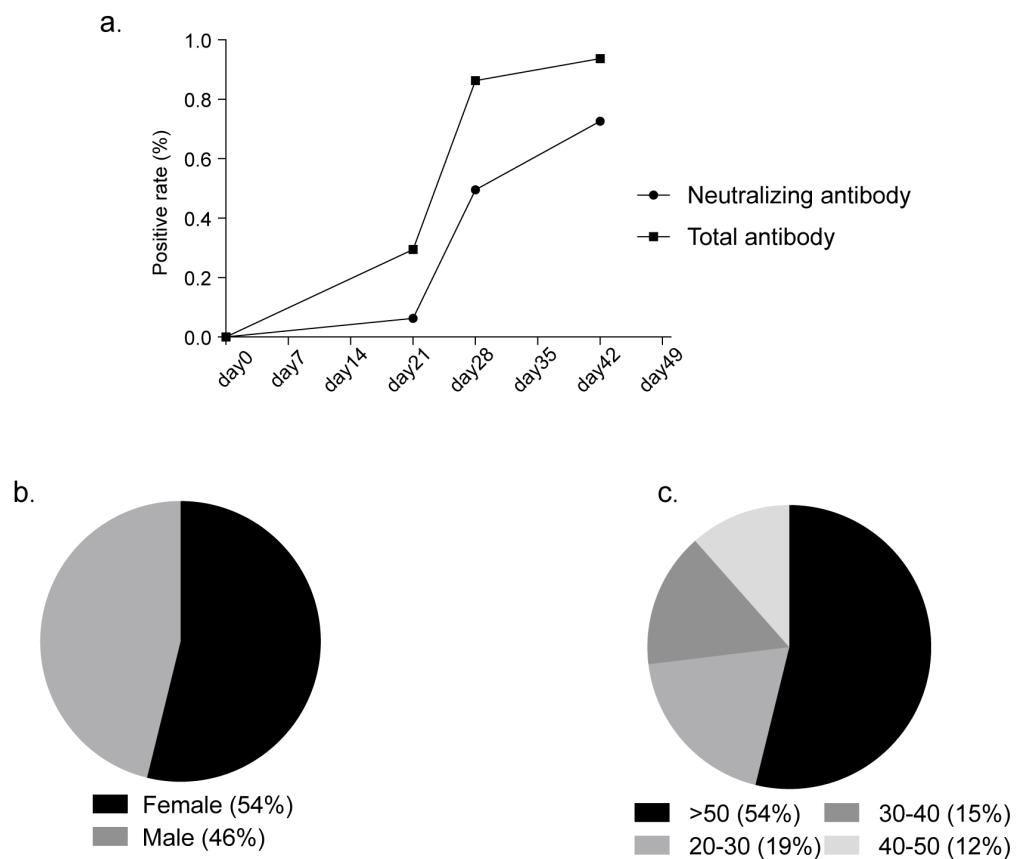

**Fig. S1.** a) Antibody analysis of the 95 participants before and after vaccination, b) sex distribution of the 26 people with Nabs negative on day 42, c) age distribution of the 26 people with NAbs negative on day 42.

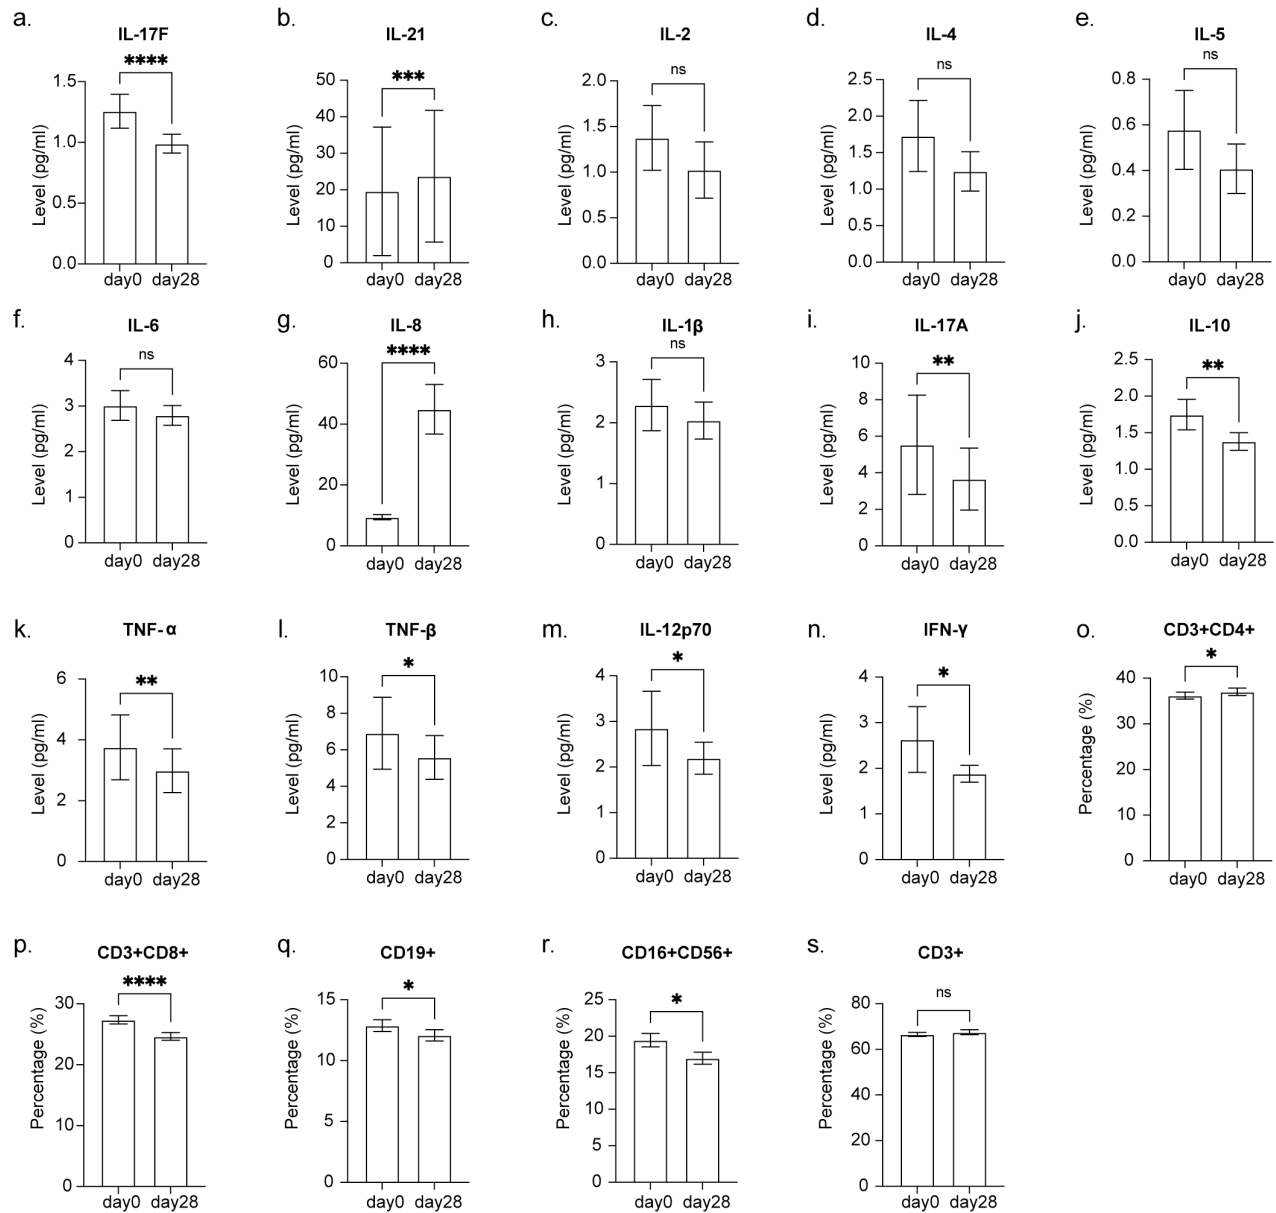

**Fig. S2.** Comparison of cytokines and lymphocytes subpopulations between the samples collected on day 0 and day 28 for all the participants. Error bars show standard error of mean among samples. P-value was calculated by the Wilcoxon test. Asterisks represent statistically significant difference between groups (\*: p-value < 0.05, \*\*: p-value < 0.01, \*\*\*: p-value < 0.001, \*\*\*\*: p-value < 0.0001).

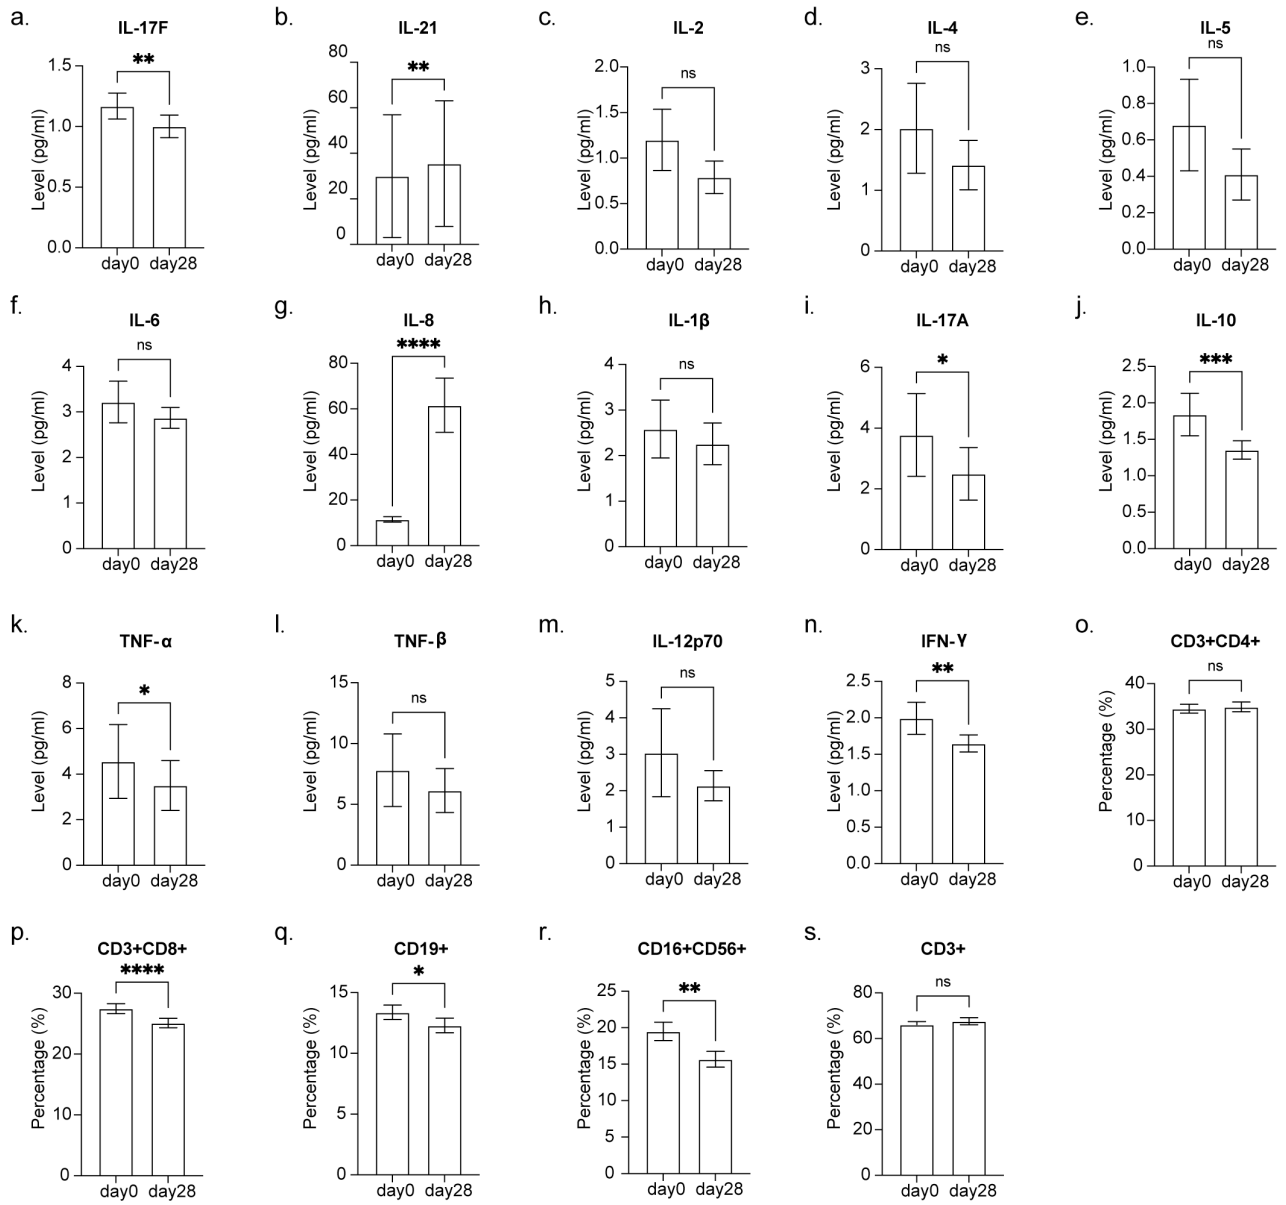

**Fig. S3.** Comparison of cytokines and lymphocytes subpopulations between the samples collected on day 0 and day 28 for all the participants with age < 50. Error bars show standard error of mean among samples. P-value was calculated by the Wilcoxon test. Asterisks represent statistically significant difference between groups (\*: p-value < 0.05, \*\*: p-value < 0.01, \*\*\*: p-value < 0.001, \*\*\*\*: p-value < 0.0001).

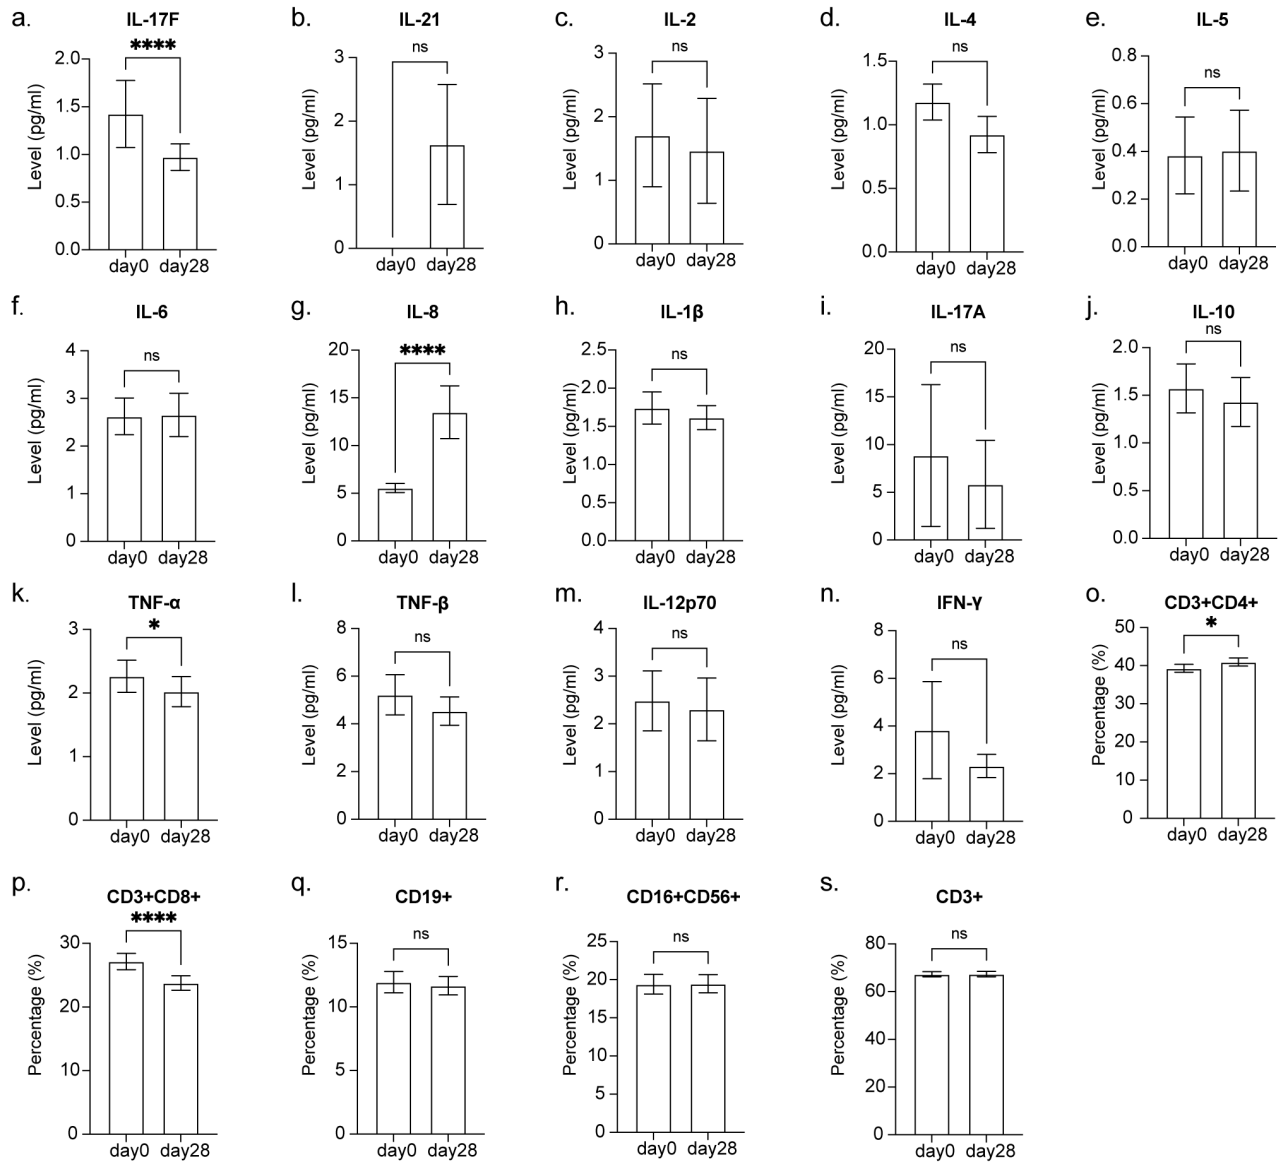

**Fig. S4.** Comparison of cytokines and lymphocytes subpopulations between the samples collected on day 0 and day 28 for all the participants with age > 50. Error bars show standard error of mean among samples. P-value was calculated by the Wilcoxon test. Asterisks represent statistically significant difference between groups (\*: p-value < 0.05, \*\*\*\*: p-value < 0.0001).

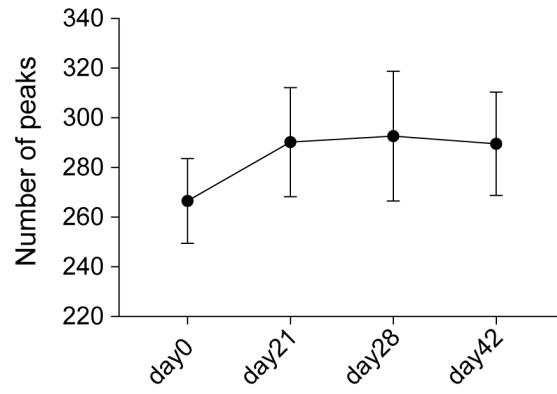

**Fig. S5.** Number of peaks on MALDI-TOF mass spectra of serum peptidome from 95 participants on day 0, day 21, day 28 and day 42. Error bars show standard deviation among samples.

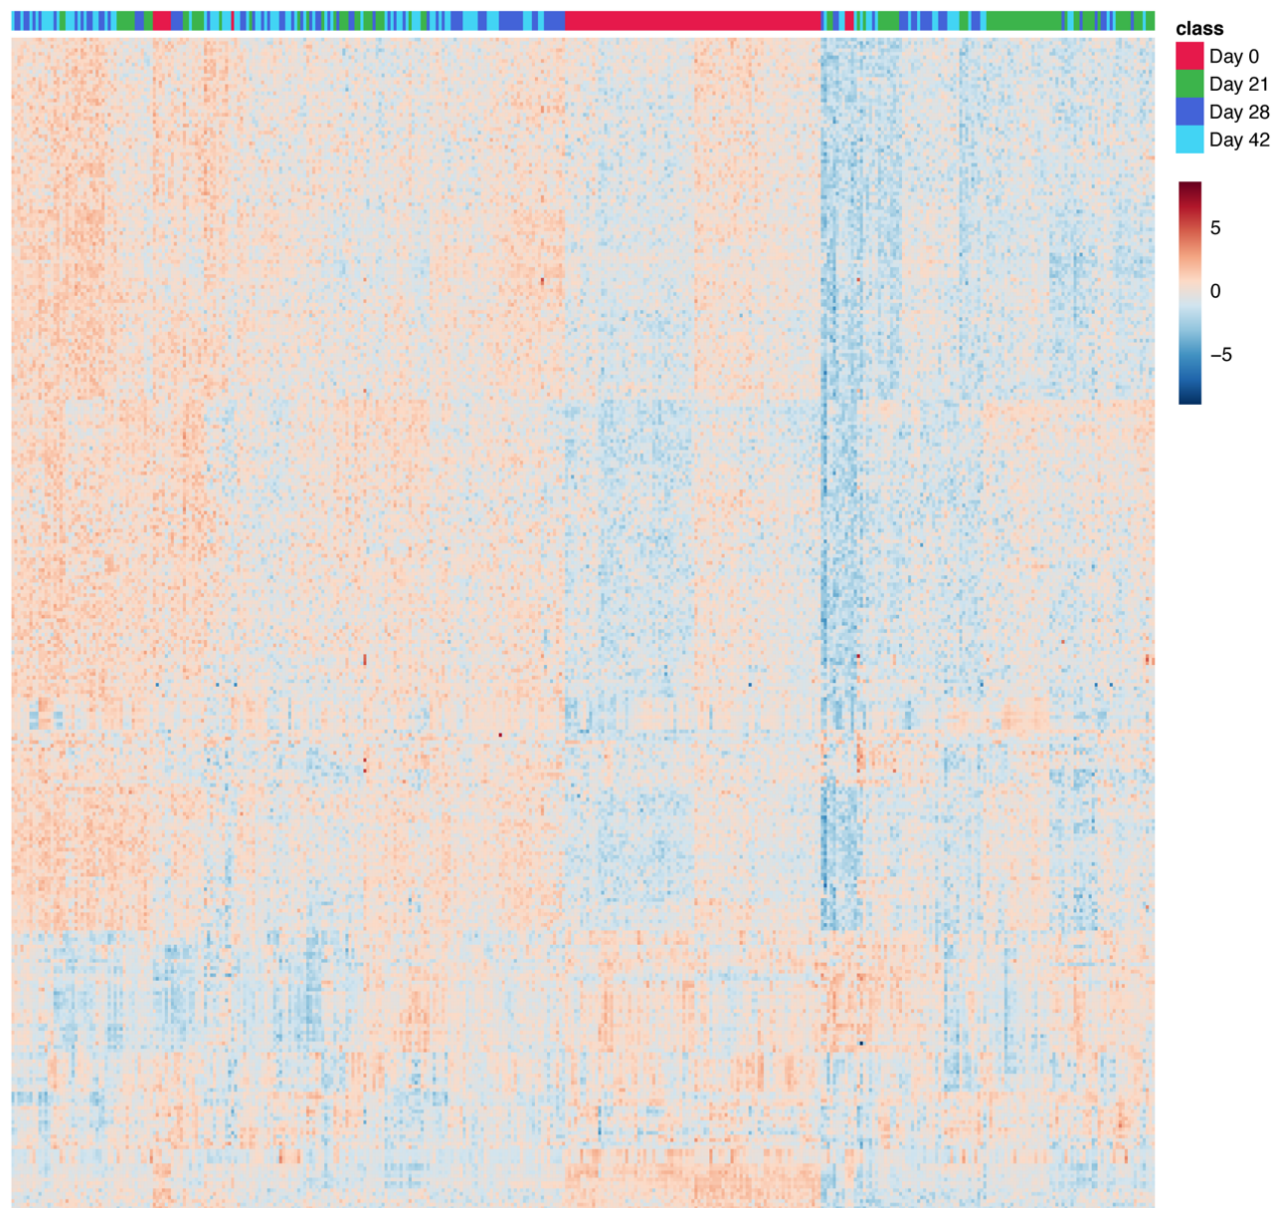

**Fig. S6.** Heat map based on cluster analysis of MALDI-TOF MS features collected at four time points for all participants before and after vaccination. Distance measure using Euclidean, and clustering algorithm using ward.D.

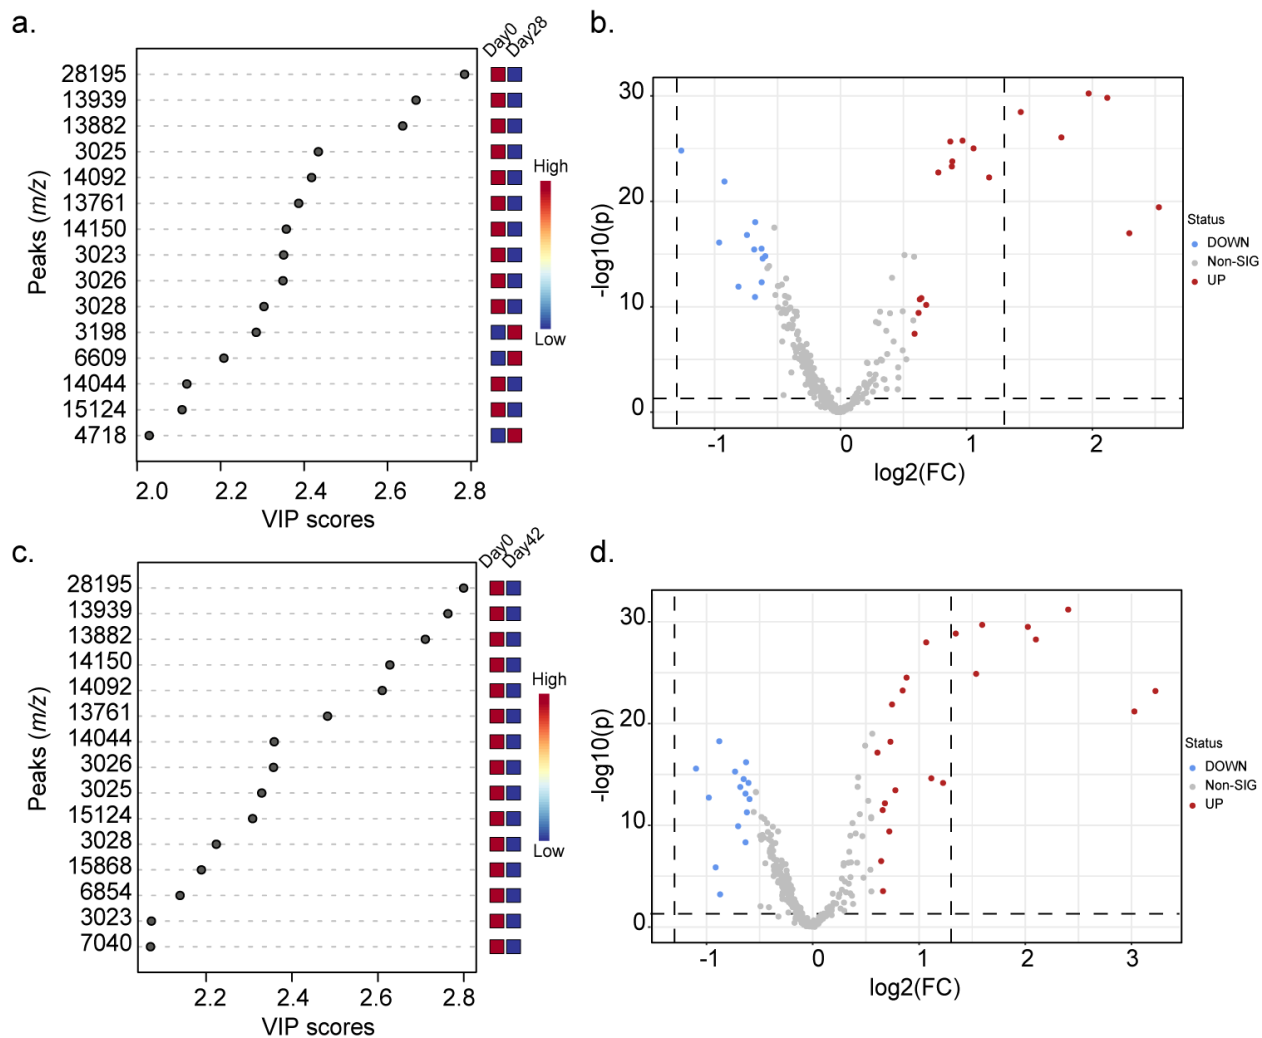

**Fig. S7.** a) Top 15 features by PLS-DA between the MALDI-TOF MS features of samples collected on day 0 and day 28 ranked by the decrease in VIP values; b) volcano-plot between MALDI-TOF MS features of samples collected on day 0 and day 28 (day 0/day 28); c) Top 15 features by PLS-DA between the MALDI TOF MS features of samples collected on day 0 and day 42 ranked by the decrease in VIP values; d) volcano-plot between MALDI TOF MS features of samples collected on day 0 and day 42 (day 0/day 42). The colored dots represent significant features by volcano-plot (fold change (FC) > 1.5, and p-value < 0.05). P-value was calculated by the Wilcoxon test.

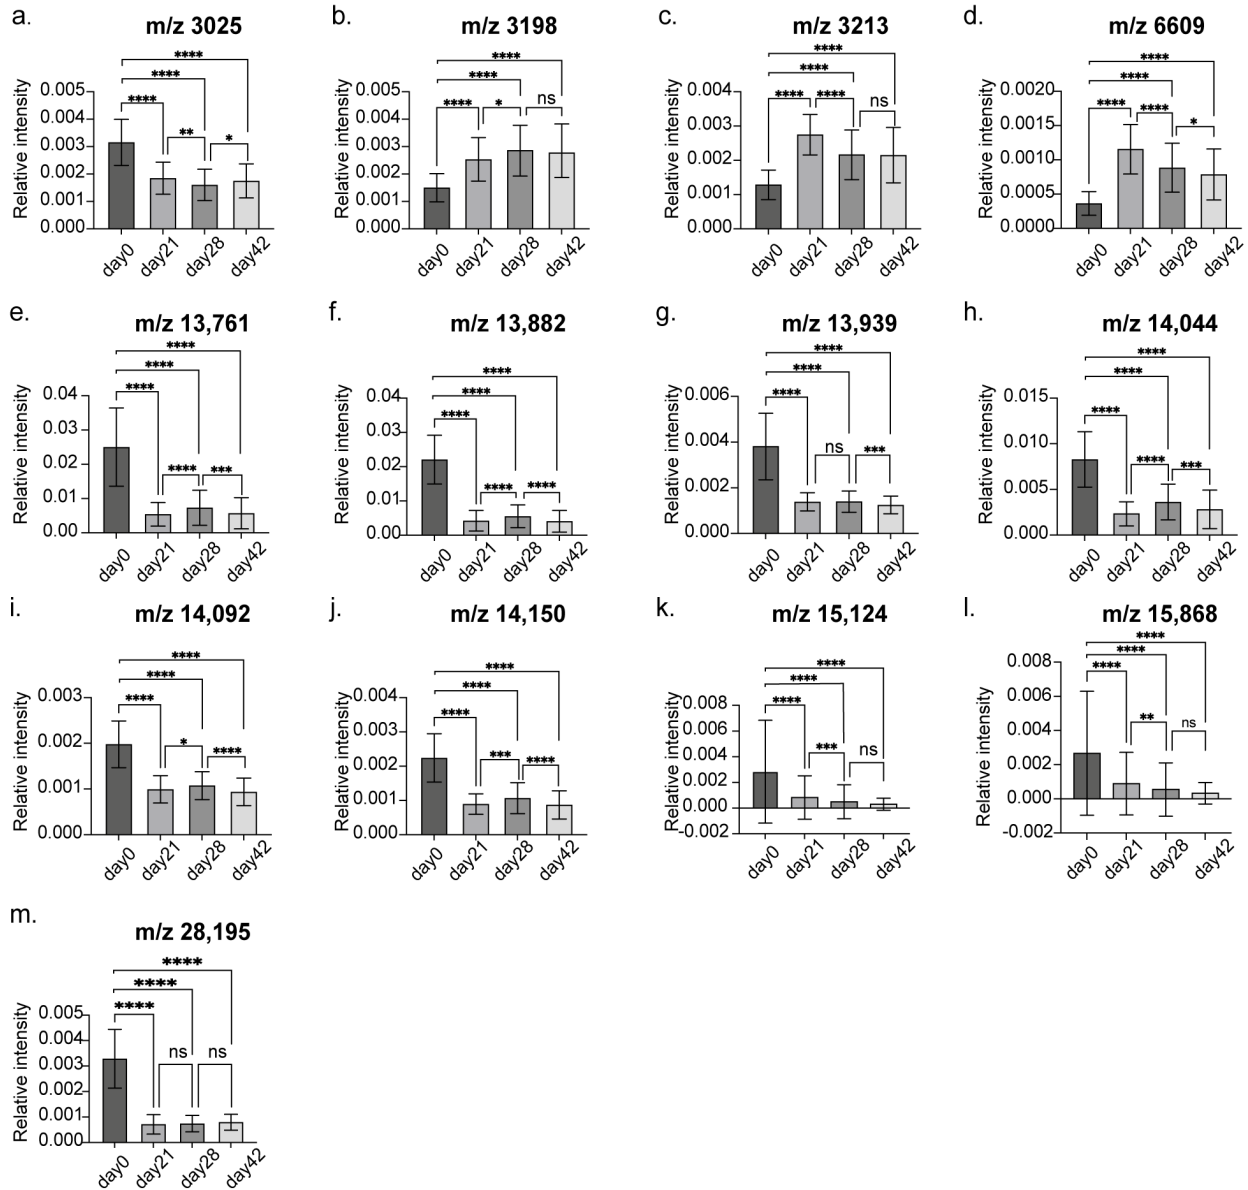

**Fig. S8.** The relative intensity of the 13 feature peaks before vaccination and during the 6-week recovery phase after vaccination. Error bars show standard deviation of mean among samples. P-value was calculated by the Wilcoxon test. Asterisks represent statistically significant differences between groups (\*: p-value < 0.05, \*\*: p-value < 0.01, \*\*\*: p-value < 0.001, \*\*\*\*: p-value < 0.0001).



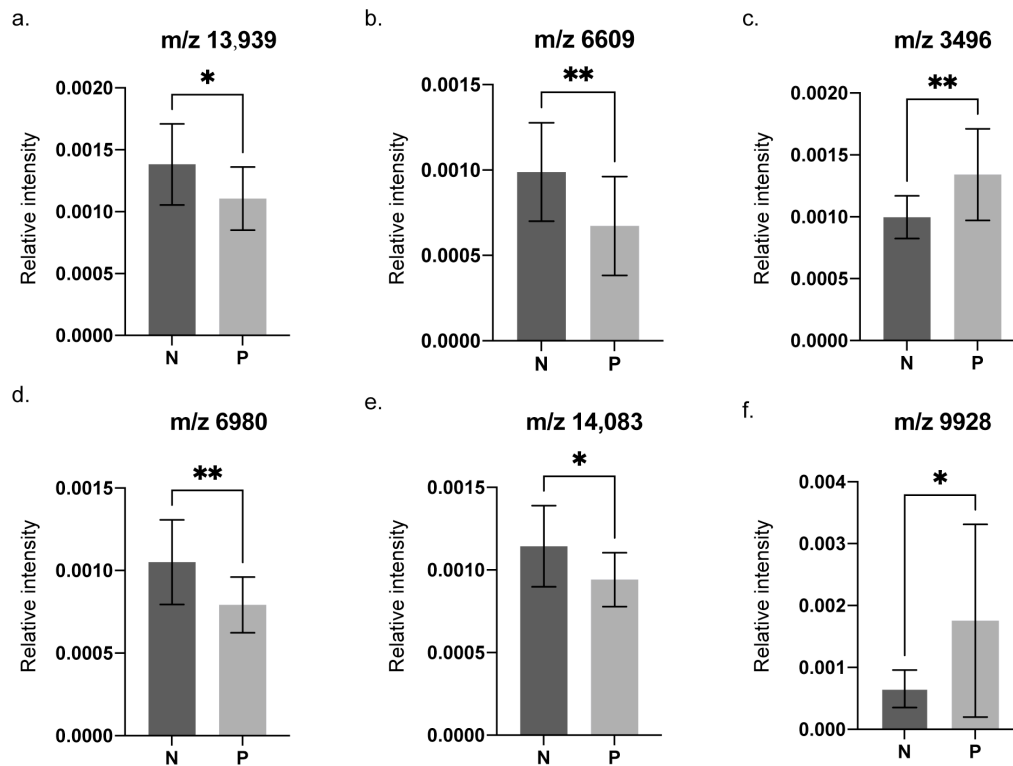

**Fig. S9.** Relative intensity of 6 feature peaks of NAbs generation for samples collected on day 42 from female participants. Error bars show standard deviation of mean among samples. P-value was calculated by the Mann-Whitney test. Asterisks represent statistically significant differences between groups (\*p-value < 0.05, \*\*p-value < 0.01). N: NAbs negative; P: NAbs positive.

## 2.2 Supplementary Tables

Table S1. Demographics of participants

| <b>Sex=no.</b>                |                |                |                |                |                |
|-------------------------------|----------------|----------------|----------------|----------------|----------------|
| Male (%)                      |                |                |                |                | 40 (42.1)      |
| Female (%)                    |                |                |                |                | 55 (57.9)      |
| <b>Age-year</b>               |                |                |                |                |                |
| Range                         | 20-29          | 30-39          | 40-49          | 50-54          | 55-59          |
| People count (%)              | 28(29.4)       | 16(16.8)       | 18(18.9)       | 11(11.6)       | 22(23.2)       |
| Mean $\pm$ SD                 | 25.0 $\pm$ 2.5 | 34.3 $\pm$ 3.5 | 44.7 $\pm$ 2.9 | 51.6 $\pm$ 0.9 | 56.6 $\pm$ 1.3 |
| Median (IQR)                  | 25.0 $\pm$ 4.0 | 35.0 $\pm$ 7.3 | 45.0 $\pm$ 4.8 | 52.0 $\pm$ 1.0 | 57.0 $\pm$ 2.0 |
| NAbs production on day 42 (%) | 53.6           | 62.50          | 55.60          | 27.3           | 40.9           |
| <b>BMI</b>                    |                |                |                |                |                |
| Value (kg/m <sup>2</sup> )    | Below 18.5     | 18.5-24.9      | 25-29.9        | Above 30       |                |
| Range                         | Underweight    | Normal weight  | Pre-obesity    | Obesity        |                |
| People count (%)              | 4 (4.2)        | 60 (63.2)      | 29 (30.5)      | 2 (2.1)        |                |
| Mean $\pm$ SD                 | 18.1 $\pm$ 0.3 | 22.2 $\pm$ 1.4 | 26.8 $\pm$ 1.0 | 31.8 $\pm$ 0.8 |                |
| Median (IQR)                  | 18.2 (0.4)     | 22.4 (2.1)     | 26.7 (1.1)     | 31.8 (0.8)     |                |
| <b>Antibody</b>               |                |                |                |                |                |
| Sampling time                 | Day 0          | Day 21         | Day 28         | Day 42         |                |
| Total antibody (%)            | 0 (0.0)        | 28 (29.5)      | 82 (86.3)      | 90 (94.7)      |                |
| NAbs (%)                      | 0 (0.0)        | 6 (0.1)        | 47 (49.5)      | 69 (72.6)      |                |

BMI: body mass index. The recommended levels are adapted from the global WHO recommendation of over 30 as an obese BMI. SD: standard deviation. IQR: interquartile range of feature intensity.

**Table S2.** Intensities of feature peaks of vaccination (Day 0 and Day 28)

| <i>m/z</i> | Day 0                   |                       | Day 28                  |                       | Raw p-value** | Adjusted p-value*** | VIP score |
|------------|-------------------------|-----------------------|-------------------------|-----------------------|---------------|---------------------|-----------|
|            | Median (IQR)*<br>(E-03) | $Q_1-Q_3$ *<br>(E-03) | Median (IQR)*<br>(E-03) | $Q_1-Q_3$ *<br>(E-03) |               |                     |           |
| 3025       | 3.08 (0.9)              | 2.64-3.54             | 1.55 (0.61)             | 1.26-1.87             | 1.2983E-34    | 4.2195E-34          | 2.351     |
| 3198       | 1.49 (0.71)             | 1.15-1.86             | 2.91 (1.15)             | 2.27-3.42             | 5.0417E-29    | 8.1928E-29          | 2.2853    |
| 6609       | 0.385 (0.223)           | 0.248-0.471           | 0.860 (0.418)           | 0.652-1.07            | 1.651E-26     | 2.3847E-26          | 2.2079    |
| 15124      | 1.46 (2.854)            | 0.476-3.33            | 0.154 (0.248)           | 0.103-0.351           | 1.3888E-23    | 1.6413E-23          | 2.1078    |
| 13882      | 21.5 (10.1)             | 17.1-27.2             | 5.13 (3.99)             | 3.46-7.45             | 1.9766E-44    | 8.5651E-44          | 2.6362    |
| 13761      | 23.7 (13.3)             | 17.4-30.7             | 6.81 (4.94)             | 4.19-9.13             | 1.009E-32     | 2.1861E-32          | 2.387     |
| 13939      | 3.67 (1.95)             | 2.75-4.70             | 1.35 (0.41)             | 1.19-1.60             | 2.6798E-46    | 1.7419E-45          | 2.6681    |
| 14092      | 1.97 (0.67)             | 1.68-2.35             | 1.08 (0.348)            | 0.902-1.25            | 5.9111E-34    | 1.5369E-33          | 2.418     |
| 28195      | 3.30 (1.62)             | 2.49-4.11             | 0.758 (0.436)           | 0.556-0.992           | 3.4619E-54    | 4.5005E-53          | 2.7843    |
| 14150      | 2.14 (0.92)             | 1.71-2.63             | 1.05 (0.64)             | 0.71-1.35             | 1.3458E-31    | 2.4993E-31          | 2.3575    |
| 14044      | 8.02 (3.6)              | 6.50-10.1             | 3.60 (2.71)             | 2.41-5.12             | 6.6495E-24    | 8.6443E-24          | 2.1192    |
| 3213       | 1.25 (0.541)            | 0.989-1.53            | 2.20 (0.92)             | 1.74-2.66             | 2.1796E-21    | 2.3613E-21          | 2.0244    |

\*: IQR: interquartile range of feature intensity;  $Q_1$ : the lower quartile value;  $Q_3$ : the upper quartile value.

\*\* : raw p-value was calculated by the Wilcoxon test.

\*\*\*: Adjusted p-value: raw p-value was adjusted for multiple hypothesis testing using a Benjamini-Hochberg correction.

**Table S3.** Intensities of feature peaks of vaccination (Day 0 and Day 42)

| <i>m/z</i> | Day 0                   |                       | Day 42                  |                       | Raw p-value** | Adjusted p-value*** | VIP score |
|------------|-------------------------|-----------------------|-------------------------|-----------------------|---------------|---------------------|-----------|
|            | Median (IQR)*<br>(E-03) | $Q_1-Q_3$ *<br>(E-03) | Median (IQR)*<br>(E-03) | $Q_1-Q_3$ *<br>(E-03) |               |                     |           |
| 3025       | 3.08 (0.9)              | 2.64-3.54             | 1.67 (0.62)             | 1.44-2.06             | 2.1942E-30    | 3.8399E-30          | 2.3295    |
| 3198       | 1.49 (0.71)             | 1.15-1.86             | 2.64 (1.52)             | 2.08-3.60             | 6.2067E-22    | 7.8994E-22          | 2.0498    |
| 15124      | 1.46 (2.854)            | 0.476-3.33            | 0.137 (0.107)           | 0.103-0.210           | 1.1972E-29    | 1.8622E-29          | 2.3083    |
| 15868      | 1.22 (3.278)            | 0.372-3.65            | 0.106 (0.102)           | 0.071-0.173           | 8.5715E-26    | 1.2E-25             | 2.189     |
| 13882      | 21.5 (10.1)             | 17.1-27.2             | 3.46 (4.35)             | 1.51-5.86             | 1.3764E-48    | 6.4234E-48          | 2.7104    |
| 13761      | 23.7 (13.3)             | 17.4-30.7             | 4.93 (5.83)             | 2.29-8.12             | 1.823E-36     | 4.2536E-36          | 2.4826    |
| 13939      | 3.67 (1.95)             | 2.75-4.70             | 1.25 (0.45)             | 1.02-1.47             | 3.5711E-52    | 2.4998E-51          | 2.763     |
| 14092      | 1.97 (0.67)             | 1.68-2.35             | 0.934 (0.336)           | 0.754-1.09            | 1.1375E-42    | 3.1851E-42          | 2.61      |
| 28195      | 3.30 (1.62)             | 2.49-4.11             | 0.789 (0.371)           | 0.625-0.996           | 6.4943E-55    | 9.0921E-54          | 2.7995    |
| 14150      | 2.14 (0.92)             | 1.71-2.63             | 0.82 (0.501)            | 0.619-1.12            | 1.2199E-43    | 4.2696E-43          | 2.6278    |
| 14044      | 8.02 (3.6)              | 6.50-10.1             | 2.85 (2.69)             | 1.20-3.89             | 1.8906E-31    | 3.7812E-31          | 2.3586    |

\*: IQR: interquartile range of feature intensity;  $Q_1$ : the lower quartile value;  $Q_3$ : the upper quartile value.

\*\* : raw p-value was calculated by the Wilcoxon test.

\*\*\*: Adjusted p-value: raw p-value was adjusted for multiple hypothesis testing using a Benjamini-Hochberg correction.

**Table S4.** Annotation of feature peaks of vaccination.

| <b>Matched Features (m/z)</b> | <b>Gene Name</b> | <b>Protein Accession</b> | <b>Protein</b>                              | <b>Function</b>                                                                              |
|-------------------------------|------------------|--------------------------|---------------------------------------------|----------------------------------------------------------------------------------------------|
| 3025                          | CD99             | P14209                   | CD99 antigen (75-105)                       | ENOG503JHJ5: S, CD99 antigen like protein 2                                                  |
| 6609                          | CD93             | Q9NPY3                   | Complement component C1q receptor (242-303) | ENOG503J31H: T, Signal transduction mechanisms; complement component C1q binding             |
| 13,882                        | PPBP             | P02775                   | Platelet basic protein                      | ENOG503JI3M: T, Signal transduction mechanisms. CXCR chemokine receptor binding              |
| 14,044                        | HBD              | P02042                   | Hemoglobin subunit delta (19-147)           | ENOG503JGFD: C, Energy production and conversion. hemoglobin subunit                         |
| 14,092                        | MBL2             | P11226                   | Mannose-binding protein C (100-227)         | ENOG503J318: W, Extracellular structures. mannose-binding lectin (protein C) 2               |
| 14,150                        | CD59             | P13987                   | CD59 glycoprotein                           | ENOG503JHW4: T, Signal transduction mechanisms. CD59 molecule, complement regulatory protein |
| 15,124                        | HBA1             | P69905                   | Hemoglobin subunit alpha (2-142)            | ENOG503JGIH: C, Energy production and conversion. oxygen carrier activity                    |
| 15,868                        | HBB              | P68871                   | Hemoglobin subunit beta (2-147)             | ENOG503JGFD: C, Energy production and conversion. hemoglobin subunit                         |
| 28,195                        | LRG1             | P02750                   | Leucine-rich alpha-2-glycoprotein (94-347)  | ENOG503JA7H: T, Signal transduction mechanisms. Leucine rich repeat C-terminal domain        |

**Table S5.** Intensities of feature peaks of NAbs generation in the training cohort.

| <i>m/z</i> | Positive group          |                       | Negative group          |                       | Raw p-value** | Adjusted p-value*** | VIP score |
|------------|-------------------------|-----------------------|-------------------------|-----------------------|---------------|---------------------|-----------|
|            | Median (IQR)*<br>(E-03) | $Q_1-Q_3$ *<br>(E-03) | Median (IQR)*<br>(E-03) | $Q_1-Q_3$ *<br>(E-03) |               |                     |           |
| 13939      | 1.11 (0.355)            | 0.915-1.27            | 1.35 (0.32)             | 1.23-1.55             | 0.014057      | 0.01968             | 2.3601    |
| 6980       | 0.764 (0.195)           | 0.672-0.867           | 1.04 (0.343)            | 0.887-1.23            | 0.004193      | 0.0081819           | 2.7228    |
| 3496       | 1.25 (0.42)             | 1.09-1.51             | 1.02 (0.315)            | 0.835-1.15            | 0.0018686     | 0.0065401           | 2.7516    |
| 14083      | 0.954 (0.196)           | 0.834-1.03            | 1.14 (0.336)            | 0.964-1.30            | 0.028303      | 0.028303            | 2.1904    |
| 6609       | 0.722 (0.474)           | 0.407-0.881           | 1.09 (0.394)            | 0.806-1.20            | 0.0046754     | 0.0081819           | 2.6133    |
| 9928       | 1.17 (1.704)            | 0.546-2.25            | 0.644 (0.369)           | 0.411-0.780           | 0.028303      | 0.028303            | 2.3028    |

\*: IQR: interquartile range of feature intensity;  $Q_1$ : the lower quartile value;  $Q_3$ : the upper quartile value.

\*\* : raw p-value was calculated by the Mann-Whitney test.

\*\*\*: Adjusted p-value: raw p-value was adjusted for multiple hypothesis testing using a Benjamini-Hochberg correction.

**Table S6.** Prediction results of NAbs generation using different machine learning models in the test cohort.

| Sample Name | True | RF | PLS-DA | SVM | LR |
|-------------|------|----|--------|-----|----|
| A4001       | N    | N  | N      | N   | N  |
| A4006       | P    | P  | N      | N   | N  |
| A4009       | P    | P  | P      | P   | P  |
| A4014       | N    | P  | P      | P   | P  |
| A4032       | N    | P  | P      | P   | P  |
| A4052       | P    | P  | P      | P   | P  |
| A4055       | N    | N  | N      | N   | N  |
| A4070       | P    | N  | N      | N   | N  |
| A4072       | P    | P  | P      | P   | P  |
| A4076       | P    | P  | P      | P   | P  |
| A4078       | P    | P  | N      | N   | N  |
| A4080       | P    | N  | N      | N   | N  |
| A4083       | P    | P  | P      | P   | P  |
| A4097       | P    | P  | P      | P   | N  |

N: negative, P: positive, RF: random forest, PLS-DA: partial least squares discriminant analysis, SVM: linear support vector machine, LR: logistic regression.

**Table S7.** Annotation of the feature peaks of NAbs generation for samples collected on day 42 from female participants.

| <b>Matched Features (m/z)</b> | <b>Gene Name</b> | <b>Protein Accession</b> | <b>Protein</b>                    | <b>Function</b>                                                                       |
|-------------------------------|------------------|--------------------------|-----------------------------------|---------------------------------------------------------------------------------------|
| 6980                          | ITM2B            | Q9Y287                   | Integral membrane protein 2B      | ENOG503J93I: S, negative regulation of amyloid precursor protein biosynthetic process |
| 6609                          | CD93             | Q9NPY3                   | Complement component C1q receptor | ENOG503J31H: T, Signal transduction mechanisms; complement component C1q binding      |
| 9928                          | PF4              | P02776                   | Platelet factor 4                 | ENOG503JHWI: T, Signal transduction mechanisms.<br>platelet factor 4                  |
| 14083                         | MBL2             | P11226                   | Mannose-binding protein C         | ENOG503J318: W, Extracellular structures.<br>mannose-binding lectin (protein C) 2     |
