# Supplementary material for: Serum peptidome profiles immune response of COVID-19 Vaccine administration
Source: Front Immunol. 2022 Aug 24;13:956369. doi: 10.3389/fimmu.2022.956369 (PMC9450691; doi:10.3389/fimmu.2022.956369)
Supplement: Supplementary file 2 [file Table_1.xlsx]

## Sheet: Legend
Data S1. Processed MALDI-MS intensity matrix.
Sheet AlignmentMatrix:	Peak intensity matrix processed by MALDIquant and normalized by Metaboanalyst.

## Sheet: AlignmentMatrix
Sample No.	1	2	3	4	5	6	7	8	9	10	11	12	13	14	15	16	17	18	19	20	21	22	23	24	25	26	27	28	29	30	31	32	33	34	35	36	37	38	39	40	41	42	43	44	45	46	47	48	49
Blood Collection Round	1	1	1	1	1	1	1	1	1	1	1	1	1	1	1	1	1	1	1	1	1	1	1	1	1	1	1	1	1	1	1	1	1	1	1	1	1	1	1	1	1	1	1	1	1	1	1	1	1
2999.93	18.2203	16.444	15.5117	22.3767	29.0708	22.4533	14.4935	14.4877	18.0049	15.8539	21.0123	13.3606	19.2855	13.9122	13.5303	17.3455	15.7713	19.0746	15.3615	15.9092	19.4381	18.7221	17.38	17.4445	9.98209	14.7744	11.5457	13.0623	15.1847	30.4543	16.1844	11.836	16.6487	11.7946	18.5555	12.9852	8.53817	8.69965	15.1788	18.1102	11.3061	13.7948	9.43561	16.502	15.6143	12.5752	15.2282	16.9512	16.9094
3017.54	3.05803	2.48239	2.57833	1.9928	4.3377	3.37546	2.85261	2.61339	2.4231	2.32943	3.51289	1.74758	3.68411	2.95419	2.39891	3.24407	2.67832	2.96493	1.90071	2.66889	2.91139	2.71371	3.55368	3.04056	1.52061	1.63218	1.49633	1.3952	1.61116	5.04444	2.21831	1.93625	2.43282	1.96847	2.33598	2.7353	1.17758	1.31259	4.14587	4.09407	1.55435	1.84372	2.1271	2.48286	2.77518	2.21716	2.87844	3.12037	2.51462
3019.61	4.08011	2.39999	3.01274	4.20553	3.5811	3.07882	2.44792	3.5374	2.2234	3.16558	4.02531	2.99445	3.39107	2.44102	2.06515	3.75883	3.4034	2.92532	3.2883	2.60485	3.67286	4.83947	3.05905	3.39579	1.98806	2.18523	1.60273	1.9858	2.70579	5.45811	2.55857	1.93974	2.60258	1.91452	2.77831	1.63906	1.45885	2.24069	3.47803	3.51607	1.54169	1.58116	1.95163	2.459	2.63116	2.94489	2.4486	2.93534	2.4449
3022.78	3.59751	3.14667	2.86522	3.33189	5.76115	5.00097	3.86106	2.41919	3.41595	2.85115	4.30676	3.28813	3.80894	2.13389	2.48803	4.08849	3.29338	2.84403	2.54774	3.34488	4.22205	6.04656	4.34153	2.92042	2.07769	2.51438	2.26351	2.12796	3.59985	4.61246	2.66246	2.80039	4.25065	2.85742	3.44273	3.81838	1.92458	1.42536	2.76597	3.46203	2.05323	2.71536	1.8214	3.12658	3.00186	2.18172	3.16134	3.63416	3.22256
3024.78	2.90129	1.75989	3.20763	3.54931	5.03872	4.59452	1.82522	2.83769	2.75027	2.96322	5.21433	3.48833	3.54202	2.60586	1.76088	2.9186	3.07989	3.8813	2.63161	3.0893	2.52521	4.69708	3.22908	2.78789	1.61879	2.77918	2.36339	2.76449	2.79804	5.07194	2.48023	2.35147	3.44115	2.98395	4.34764	2.97044	1.44434	1.99468	3.16013	3.28319	2.90487	2.41111	1.58486	2.94811	2.81176	3.03574	2.50913	3.0859	3.25845
3026.38	3.35387	2.35699	2.47125	3.30566	3.68311	4.08671	2.41418	2.17411	3.064	3.24262	4.24602	3.29826	2.55814	3.25719	1.81181	2.3387	3.8673	3.74614	3.37554	3.52106	3.2835	3.9656	2.83627	1.82814	1.93133	2.59225	2.68524	3.96731	2.84548	4.4412	3.09598	1.44127	2.92188	2.71409	3.70714	2.42942	1.59514	1.52708	4.23524	3.29722	2.63212	2.94761	1.94918	2.47772	2.95406	2.52168	1.93694	2.76604	4.22701
3028.25	2.73008	3.16378	2.7718	3.08798	4.20304	3.22948	2.19019	2.11153	3.52919	2.30981	4.25413	2.64269	3.39432	2.7599	2.25215	2.65901	3.39978	4.14841	2.19651	2.45368	4.25904	3.04989	2.89291	1.90416	1.84462	3.45497	3.00292	3.13607	2.59325	3.88407	2.95016	1.04207	3.42275	2.86151	3.02808	2.61586	1.97516	1.3609	3.51999	2.65156	2.02263	3.44832	2.34884	3.16786	2.57858	2.49206	2.16956	2.47306	3.51146
3031.51	3.29411	2.47678	2.34064	2.74639	3.92222	3.64295	2.48952	2.21183	3.42018	2.84249	2.55589	3.75688	2.63327	2.17369	2.56623	1.86397	2.55872	3.47719	3.03162	3.49436	4.65755	3.49283	2.62771	2.07934	2.19087	3.10129	2.53268	2.70397	2.11846	5.07032	2.51039	2.1605	2.69647	2.41722	3.9341	4.02961	2.33804	2.78847	2.18979	1.5365	3.16904	2.44126	2.04336	3.66806	2.93975	1.92783	3.13401	1.68844	3.71305
3033.81	2.49627	2.7589	2.00346	2.7624	2.65815	2.34958	2.25805	2.34522	2.74279	2.63985	2.46296	2.6437	2.21471	1.99351	2.39322	1.58877	1.95741	1.86434	2.51523	2.01684	3.4387	2.12337	1.65445	1.08317	1.84288	3.92495	2.86155	2.40748	2.40312	2.83095	2.4952	1.4519	2.47526	2.68639	3.02268	3.90962	1.70446	2.33614	1.94911	2.19957	2.46013	2.81193	2.48594	2.56358	2.17303	1.45792	2.83201	3.236	2.9988
3038.95	1.42355	1.43804	2.17157	2.18655	1.56935	2.57739	0.911335	1.11703	1.95473	1.26661	2.97473	1.27461	3.10171	1.65994	1.19047	2.05825	1.69998	1.9272	1.32118	2.0799	1.26627	2.37282	2.18507	3.3415	1.20533	1.58889	1.82216	1.3541	2.24231	2.03949	0.815714	1.28016	1.92284	1.24404	2.29728	2.88273	1.07688	1.08306	2.73807	2.40734	1.51205	1.69182	1.33147	1.53774	1.9735	2.11466	1.70963	1.56256	1.71034
3041.17	1.76643	1.16624	1.70453	1.76175	1.98088	2.53236	1.18605	1.93475	1.49792	1.41363	1.50505	1.43014	1.96978	1.81178	1.12382	1.86574	1.6761	2.25829	1.58182	2.55107	1.46903	3.64041	1.44039	2.31467	1.87276	1.47289	1.113	1.33463	1.72678	3.0849	1.20265	1.36385	2.62813	1.97916	2.08146	2.21023	1.16771	0.998086	2.74275	2.15823	1.07739	1.4451	1.84263	3.15706	2.56717	1.81049	2.04292	2.80005	2.66625
3050.91	1.61189	1.05217	1.01638	1.43768	2.45666	2.36539	1.13517	1.03969	2.02682	0.897596	2.40828	1.56126	1.74174	0.798325	0.907695	0.928235	1.02797	2.47025	1.22029	1.25039	2.42467	1.79407	1.196	0.75666	0.906388	1.37699	1.5606	1.45598	1.28725	2.32984	1.48508	0.893495	2.08031	1.27001	1.84461	1.16638	1.0184	0.949389	2.07186	0.553157	0.963447	1.06937	1.09952	1.24086	1.12175	1.2434	1.32785	1.17628	1.70687
3054.49	1.9886	1.5805	1.7063	1.31941	1.69572	1.16592	0.72348	1.17645	1.45456	1.8624	1.57033	1.302	1.73657	1.85544	1.44603	1.88948	1.55179	1.76607	1.03279	1.00171	1.26468	3.54172	2.01036	2.1441	0.568419	1.59027	0.802031	1.14169	1.48338	2.52752	1.20981	0.964285	2.49056	1.33213	1.85824	2.08616	0.898724	1.77692	1.88197	1.52714	1.17199	2.59347	1.4475	1.17201	1.00375	0.921276	0.841828	2.12795	2.73617
3058.37	2.10205	1.50007	0.827152	1.24249	4.18312	2.52082	1.67586	1.65117	1.34508	2.04023	1.37513	1.90183	1.98368	1.67274	1.38162	1.10681	1.76383	1.79962	1.28223	2.0497	1.40922	2.40212	2.17159	1.51708	1.38617	1.63686	1.41956	1.17081	1.15532	2.07239	1.92566	1.39109	1.35235	1.382	1.90843	1.87856	0.781059	1.83034	1.83293	1.36086	1.3982	0.950341	1.11094	1.37601	1.76515	1.37589	2.32823	1.16581	1.96438
3062.7	1.71736	1.87292	1.53428	1.5276	1.78246	2.67083	1.55328	1.19626	1.86711	1.35893	2.22936	2.15777	1.24663	1.66633	1.47185	2.07578	1.64771	1.56723	1.15858	1.52817	2.30245	1.87347	1.78563	1.16547	0.998847	1.68021	1.42597	1.2571	1.36182	1.86422	1.36722	1.00944	2.87636	1.56714	2.18483	2.14498	0.899949	0.669849	1.44616	2.04071	1.31815	0.835813	1.03542	2.39328	1.4467	0.954692	1.21097	2.60403	2.09562
3067.27	1.41671	1.02559	1.18482	2.40589	1.95495	1.57679	1.33883	1.68847	2.00281	1.18696	2.19648	2.00706	2.16902	1.84213	1.03701	1.55037	1.6616	2.35846	1.57747	1.21104	2.34599	2.30006	1.43601	0.925426	1.37844	1.53552	1.5544	2.27241	1.35525	2.00415	0.970246	1.71581	2.15371	1.82844	1.97569	1.58242	0.967939	0.858663	1.91235	1.57682	1.20231	1.73236	1.35221	1.65209	1.43129	1.85155	1.22361	1.59658	2.06998
3070.57	1.20177	0.726992	1.64772	0.99167	1.7602	2.18946	1.47791	1.06136	1.7407	1.71074	1.76776	1.35393	2.40795	1.20162	1.91345	1.09111	1.62867	1.64037	1.13444	1.69134	1.79663	2.49707	1.37129	1.50454	0.701148	1.54393	1.17665	1.65229	1.48682	3.05656	2.09986	0.802703	1.79694	1.82381	1.65354	1.74149	0.867862	0.928566	1.49981	1.2662	1.57678	1.1644	1.37408	1.19253	1.91759	1.06366	1.59548	2.06576	2.01409
3080.77	1.08979	0.96775	1.05128	1.2161	2.23321	1.41878	0.888147	1.20275	1.11542	1.24407	1.13885	1.96165	2.12354	0.71621	0.599359	1.85877	1.59797	2.00187	1.16038	0.851289	1.49708	2.05853	1.15488	1.75947	0.629204	1.53159	0.872928	1.33542	1.49652	1.72362	1.37556	0.922759	1.09553	1.0576	1.7021	1.95802	0.733091	0.838337	1.47044	1.9648	0.833873	0.521822	0.866816	0.776994	1.18092	1.32876	1.33152	1.23861	0.943241
3085.66	3.15504	1.92604	2.75738	2.63077	3.63553	3.27087	2.57129	2.7056	2.87393	2.17342	3.65292	2.74609	2.57151	2.20585	2.73655	3.33192	3.18953	3.65451	2.46996	2.97857	4.0719	3.88536	3.84462	2.87557	2.79628	2.0115	3.2479	2.45227	2.89621	4.29354	2.68836	1.99368	4.20295	3.33002	2.90738	3.99089	1.52129	1.92534	3.99155	3.45085	2.46809	3.68451	2.17527	3.0175	3.43137	2.13277	3.47698	2.38585	3.21171
3092.1	2.37694	1.6266	2.82203	1.6856	2.01487	2.58984	2.02326	1.69328	2.84582	2.27061	2.3335	1.41929	2.54414	2.98772	1.66881	1.54626	3.45417	3.02295	1.97696	2.03798	2.39331	1.78486	1.95729	1.70345	1.62539	1.5673	3.17276	2.16507	2.76768	2.43384	2.13365	2.47202	2.73655	2.86014	2.99991	1.97875	1.35184	1.78956	1.76163	1.70186	1.49918	2.46631	1.80512	2.75952	1.65759	2.42206	3.12253	2.98556	3.4876
3095.36	0.727727	0.693388	1.2255	1.09315	1.72059	1.23088	1.09554	0.819137	1.72196	1.94615	2.39476	1.94197	1.37067	1.67598	1.13635	1.11429	1.79796	1.67796	1.61362	1.23879	0.723591	2.22626	1.18337	0.705649	0.919516	1.95672	0.952981	1.11667	0.705206	1.63868	1.39208	0.785962	2.54967	1.36392	1.45449	1.50411	0.703711	0.711691	1.25858	1.64318	1.21584	1.00013	1.16156	1.79996	1.92763	0.696972	1.63474	1.90808	1.87873
3097.67	0.657149	0.901968	1.07101	0.930629	1.23791	2.32353	0.893592	1.32536	0.83394	1.08676	1.57245	2.42243	1.57346	1.07674	0.667763	1.38272	0.975643	1.14911	1.04524	0.961932	1.61746	1.77869	0.820969	1.34301	0.577921	1.19271	1.32548	0.829435	1.20726	2.68662	1.27899	1.12588	1.61057	1.32581	1.43609	1.40965	0.743749	0.963168	1.14379	1.07201	1.00534	1.28839	1.12544	1.6982	1.04742	0.659152	1.11419	1.35715	1.28236
3100.14	1.15798	1.4125	0.554604	1.34207	1.84376	0.818861	0.864433	0.693928	0.797911	0.782937	1.19355	1.32026	1.3961	0.937176	1.18133	1.49055	0.890883	1.10376	1.44105	0.754525	2.11886	1.52832	2.29475	1.75277	0.787604	1.69647	1.01129	0.84092	0.965379	1.20816	1.28799	0.807518	2.1561	1.12133	0.955463	1.07638	0.492521	0.73797	1.13722	0.66315	0.927138	0.978492	1.03539	1.27681	0.999813	0.508832	0.730252	1.1412	1.19637
3105.33	2.43666	1.23576	1.94412	3.2099	1.37294	2.66493	2.4962	1.82249	1.10893	1.53476	1.57615	0.956305	2.16195	1.47552	1.14711	1.12663	1.54192	3.08002	1.15478	1.99023	1.22459	2.40057	2.48906	1.93256	0.721011	1.52276	0.862593	1.66823	1.63136	2.92165	0.706376	1.06182	1.63092	1.81595	1.8472	2.20822	1.60844	1.4279	1.48355	1.48707	1.07224	1.341	0.998108	1.74364	1.66117	2.10863	1.42964	1.60124	2.34823
3107.57	1.84439	1.54297	1.65379	2.44809	2.1941	1.8392	2.16439	1.92053	2.21379	1.83166	2.21592	1.08227	3.12938	1.17087	1.35079	1.24277	2.01538	3.42907	1.4408	1.75869	1.83239	1.92197	3.11586	1.92798	1.34912	1.51161	1.35135	1.84528	1.56061	2.7695	2.04238	1.97818	2.00803	1.68331	2.59647	2.93324	1.3508	1.65184	3.05714	2.15296	1.50995	2.00024	2.01592	1.92045	2.52198	2.02596	1.62194	1.65596	2.04901
3109.06	2.00652	2.15923	2.06895	2.52115	2.47462	2.33242	2.54479	2.1368	2.75168	2.16437	1.68585	1.29122	3.07312	2.3257	1.65873	2.14197	1.62616	3.87606	1.89993	2.09645	2.23017	1.48175	2.41197	1.56181	1.47321	2.25562	1.33857	1.97545	2.02832	2.56913	1.91006	2.30905	2.53179	1.58714	2.4612	2.76362	0.976745	1.47222	2.87541	2.2887	1.92715	1.38501	1.92969	1.73051	2.67833	1.81761	2.41441	2.44665	1.58579
3111.83	2.77734	2.41506	2.13973	1.80237	3.7039	2.62377	1.86215	1.62558	1.92386	1.58135	1.79677	1.07399	3.03649	1.67852	2.00866	2.18923	3.02415	3.6365	2.18387	1.82986	3.27456	2.96175	2.60157	1.65402	1.47361	2.20566	1.85543	1.33491	2.35127	2.28694	1.77725	1.92276	1.63696	2.21962	3.07821	1.74706	0.828898	1.08963	2.22251	1.66441	1.56861	1.65462	1.5688	1.62444	1.85506	1.89471	1.68832	2.34522	2.18904
3117.79	1.23514	0.689875	1.15612	1.43986	1.20945	1.51255	1.8196	1.11313	1.51491	1.0408	2.03501	1.8395	1.14681	1.70155	0.931436	1.51392	0.877942	1.40575	1.32915	1.30192	1.44114	1.58255	1.9137	1.74358	0.951271	0.821697	1.95708	1.25123	0.88891	1.94482	1.20011	1.9138	2.25337	1.29297	1.27343	1.41523	1.2649	0.609489	1.58914	1.34121	1.12528	1.00782	1.37754	2.00393	1.21361	0.816721	1.7994	1.13317	1.49451
3121.76	1.73391	1.12225	1.16678	1.95155	2.15477	1.25862	1.12298	0.969726	0.853298	0.989306	1.77845	2.41127	1.58171	1.09877	1.7948	0.890556	1.08472	1.82601	1.00838	1.44002	1.82021	1.62084	1.34326	1.56214	1.05639	2.02123	0.6513	0.899418	0.817415	1.55047	0.911798	1.01893	1.53935	1.83585	1.80143	1.44255	1.14108	1.51576	1.93738	1.61919	0.925892	0.952895	0.925109	1.85148	0.997094	1.60141	0.826147	1.20708	1.25657
3126.01	1.61659	1.22645	1.28589	1.24852	1.28335	1.93806	1.09477	0.858212	1.37534	1.61781	1.25287	1.94417	1.804	1.46656	0.743504	0.879685	0.871823	1.46366	0.807235	1.16553	1.40467	1.94318	0.954138	1.00142	0.641971	1.39206	0.824946	0.919382	1.13517	1.70332	1.13337	0.731228	2.30017	2.02273	1.3939	1.92475	0.556689	0.98396	1.50069	1.17723	0.798199	0.761241	0.639159	0.851992	1.67641	1.39503	1.13662	1.77611	1.32478
3129.37	1.30422	1.23448	1.00383	1.63857	2.41129	1.63955	1.36457	1.46067	1.50607	1.32294	1.83674	1.67858	1.946	0.801039	1.07408	1.90496	1.92835	1.48346	1.76036	1.21249	2.43938	2.84161	2.60573	1.58763	1.11065	1.84519	1.88667	1.31495	1.31354	2.66797	1.59427	1.50786	1.53643	2.04279	1.81377	1.75965	0.87441	0.921166	1.98467	1.64532	1.39812	1.80679	1.11044	1.88563	1.82238	1.80729	1.75195	1.41838	2.0755
3134.36	2.01207	1.32688	2.44784	1.56592	1.42513	1.82189	1.93081	1.56784	2.41829	2.56984	1.64951	1.49899	2.91346	1.90099	1.11384	2.5584	1.77959	2.69869	1.22854	1.77496	2.20576	2.19168	2.28902	2.16507	1.09657	1.79235	1.56607	1.67679	1.63503	2.97241	2.38607	2.07301	2.27392	0.998288	2.88158	1.48184	0.658005	1.02328	1.29969	1.33261	1.6047	1.8788	1.89735	1.88447	1.85214	1.49989	2.16123	2.0211	1.54053
3139.63	1.74181	0.721476	0.841985	0.814732	1.56236	1.28289	1.09251	1.29207	1.60337	1.06243	2.19158	1.70782	1.28172	1.07555	1.1603	1.70715	1.42917	1.30647	1.35807	1.22673	1.81247	1.84647	1.32224	0.954619	1.4408	2.23928	1.84667	1.47028	1.17137	3.21404	0.998484	0.839436	2.14849	1.33578	1.8199	1.57709	0.837123	0.88184	2.06326	1.2064	1.43949	1.35992	1.1921	1.19668	2.01242	1.37868	1.63828	1.70779	1.877
3142.01	1.45087	0.906711	0.790146	1.2177	0.841171	1.50105	0.738912	0.785508	1.23589	2.13722	1.1616	1.3646	1.21488	0.990848	1.00462	0.722916	1.87051	0.967944	1.12313	1.55814	1.45443	1.83245	1.34197	1.09593	0.543546	1.54918	1.01782	1.03755	1.01318	2.24152	1.38905	0.915519	1.78988	1.51786	1.02954	1.20303	0.632695	0.797159	2.50857	0.793331	1.17134	1.0247	1.59012	1.74929	1.46963	1.07493	1.00138	1.16815	1.59365
3144.06	0.985818	1.35752	0.807683	1.19454	1.50087	1.31688	1.88258	0.783794	0.770561	1.92823	1.5975	1.91729	1.61686	1.21012	0.91823	1.13608	1.62105	2.33003	1.04737	1.28396	1.82625	1.3799	1.49699	1.64055	1.02619	1.50074	0.810335	1.04901	0.835162	1.54415	1.37101	1.78149	1.13715	1.65451	1.13855	1.85373	0.875677	1.35127	1.0946	1.09577	0.682153	1.6992	1.13761	1.47158	1.12495	0.81378	1.35133	1.69545	1.48121
3151.01	1.73261	1.08281	1.4647	1.58381	1.84998	2.05373	1.89044	1.13601	1.75084	1.23398	2.19812	1.18867	1.45701	1.29498	1.68275	1.90067	1.64463	2.81629	1.03087	1.29995	1.57794	2.23234	2.13186	0.907461	1.04147	1.27997	1.52859	1.03445	1.67482	2.42305	1.54442	0.948427	2.06489	1.13473	2.21807	1.78105	0.826464	1.04978	1.40939	1.35931	1.29491	1.51943	0.93711	1.99234	1.71966	1.79476	1.12159	1.4778	1.21774
3154.46	1.1149	1.59496	1.15076	1.14066	1.96354	1.89375	1.17965	1.52618	2.06068	1.61455	2.3647	2.0994	2.0219	1.50272	0.995844	2.00614	1.63364	1.95261	1.82771	1.85784	1.96977	1.90879	1.41063	0.881742	1.33183	1.36236	1.43175	1.26084	1.42542	3.0129	1.5067	1.35504	1.49866	1.6926	1.67127	1.72847	0.711467	0.82792	2.0566	1.802	1.59989	1.02911	1.26581	1.00092	1.85622	1.2836	1.74405	2.17387	2.56931
3159.7	1.92739	0.71631	1.6937	1.39726	2.03354	1.66913	1.49017	1.15468	2.21501	1.41246	1.89586	1.81315	1.42587	1.70266	1.44195	0.658063	1.19388	1.40252	2.25097	1.5005	2.74282	1.5633	1.43256	1.25656	0.773344	1.51745	1.31218	2.18393	1.74816	2.03568	1.10699	1.14674	1.47576	1.65453	1.36148	1.68595	0.979527	0.746134	1.64361	1.14212	1.10662	1.51014	1.3563	1.58388	1.52407	0.928085	1.39651	1.58947	1.51046
3166.57	1.18836	1.51109	1.74763	1.41494	1.78646	1.93483	0.923468	1.16921	1.5879	1.42614	2.21901	1.1907	1.76561	0.812646	1.38975	1.63408	1.89585	1.28713	1.13798	1.33893	1.37608	1.6618	1.63314	1.2935	1.0679	1.49881	1.45036	1.33948	1.57611	2.51494	1.87198	1.21669	2.64658	1.27095	1.46802	1.53185	0.712421	0.939149	1.25682	1.22076	1.71947	1.58155	1.4076	1.62221	1.44158	1.24567	1.58285	1.90278	1.97862
3168.67	1.56033	1.84452	2.1102	1.58301	2.54466	1.86812	1.10241	1.28834	1.74197	2.10589	1.60571	1.3195	1.87887	1.18125	2.08337	1.809	1.74701	1.57841	1.27933	2.06134	1.9132	1.23954	2.09012	1.05874	0.933161	1.10686	2.10488	1.96708	1.16236	2.81312	1.04821	1.22567	3.33256	1.77346	1.2231	1.43127	0.458453	0.823241	1.82004	1.46184	1.1411	1.2422	1.49729	1.23278	1.04268	0.990057	2.10174	1.33268	1.99624
3172.68	1.66802	1.24392	1.34676	1.12229	2.3758	2.29577	1.54757	1.26215	2.05578	1.1671	2.72155	1.53913	1.47646	1.87446	1.09709	2.25981	1.41033	2.23945	1.47812	1.88889	1.74385	1.59092	1.4374	1.48782	1.48556	1.32172	0.879522	1.01791	1.90719	2.25358	1.15245	1.08438	1.0431	1.6144	2.49966	1.65257	0.837088	0.752602	1.53247	0.897806	1.46367	1.62592	1.26092	1.20793	2.02625	1.93764	1.67774	1.49345	1.49013
3176.53	1.11546	0.802261	1.37721	1.42649	2.54553	1.72428	0.825913	1.08125	1.32623	1.14399	1.51433	1.11438	1.41885	0.876836	1.14623	1.57117	0.804666	1.76544	1.0088	1.25187	1.16121	2.77586	1.6028	1.00647	0.915831	1.41167	1.00322	1.82959	1.19336	2.01203	1.33347	1.19791	1.68451	1.25088	1.8791	1.49236	0.871758	0.890075	1.42161	1.88453	0.762865	1.83731	1.17406	1.38222	1.53053	1.39259	1.50708	1.8427	1.58064
3180.98	1.45846	1.24048	1.54921	1.47487	2.01764	1.42883	2.15052	0.90406	1.75426	1.38914	1.92975	1.47384	1.40829	1.39578	1.18004	0.790724	1.66207	1.88831	1.62208	1.2273	2.30154	1.36864	1.79786	2.03448	0.952742	1.11962	1.80422	1.35663	1.17485	2.13566	1.00812	0.986341	2.2855	1.63508	1.60492	1.37304	0.508798	1.0078	1.45847	1.93278	1.5814	1.28001	1.98369	1.44284	1.49753	0.909777	1.08352	1.25475	1.60187
3184.96	1.38175	0.763518	1.05058	1.05143	0.972961	1.78466	0.689169	1.1104	1.91611	1.12362	2.05794	1.03014	1.49568	1.13792	1.60796	1.26939	1.54541	1.72598	0.749318	1.61124	1.52817	2.25479	1.34273	1.62214	1.10498	1.52204	1.29216	1.28374	1.95659	1.88349	1.39995	1.2823	1.77631	1.11925	2.16675	1.63211	0.590663	0.927262	1.76312	1.39564	1.67689	1.39487	1.62656	1.93298	1.0828	1.29847	1.67567	1.27571	1.40305
3197.73	1.36892	0.93928	0.857076	1.6276	1.97143	2.00407	2.035	1.25677	0.826635	1.15454	1.97732	1.86022	1.49033	0.996938	1.04877	1.01187	1.6007	1.90524	1.70999	1.56087	1.95545	1.8494	1.92358	1.84955	0.818305	1.10165	2.01831	1.92543	1.72052	2.63828	1.03291	1.37777	1.78948	1.25789	1.71646	2.19158	0.780072	0.8308	1.6925	1.31758	0.90105	0.937271	1.38286	0.959507	1.45592	1.06041	1.32418	1.60408	1.45355
3201.43	2.29896	2.32079	2.18005	2.17685	2.70613	2.87796	1.47628	1.98734	2.28328	2.16527	2.0023	1.63441	3.69026	2.54943	1.80736	2.4354	1.86436	2.36934	1.67104	2.50919	2.14488	2.49439	2.74235	1.5905	1.76612	1.08517	2.01795	2.31704	2.73522	2.4842	2.3478	2.01182	2.35492	2.04101	2.70632	2.16785	1.41175	1.00435	2.64406	1.84037	2.12721	1.66573	1.37293	3.95247	2.45011	1.58661	2.37134	2.42198	2.10666
3213.17	1.31008	0.815421	1.37287	1.60655	1.20656	1.53304	0.892636	1.26632	1.23606	0.96641	1.79325	1.85659	1.28584	0.740264	0.936051	1.78339	1.17769	1.31956	1.24474	1.0065	1.40994	2.29323	1.09774	1.43667	1.1124	1.59684	0.695514	0.691274	0.965562	2.72029	1.19254	1.01202	1.74669	1.24873	1.05109	1.70753	0.871691	0.963951	1.89975	1.59486	1.15284	1.13255	1.53123	0.889146	1.28252	0.739756	0.934446	0.914028	0.919275
3216.34	1.87754	1.71202	1.68007	2.41226	3.24427	3.28646	1.76003	2.25391	1.67534	1.95161	1.79912	1.94985	2.13984	2.22622	1.52617	2.35666	2.01446	1.84099	1.83288	1.49768	1.4172	3.48011	2.82256	1.50729	2.05028	1.79906	2.22673	1.86642	1.86299	2.62339	2.2827	1.85125	2.88828	2.47655	2.43859	1.92846	2.09153	1.42893	2.01441	2.56331	1.18107	1.61857	1.58661	1.66565	2.22286	0.988409	1.62147	2.04167	2.74294
3218.48	3.12196	2.01756	2.03275	3.22154	2.47247	2.57647	2.20348	2.12108	1.76025	1.86786	2.16356	2.22357	2.74752	2.0184	2.26561	1.68979	2.27343	1.76419	3.24807	2.4686	2.09343	3.01238	3.13814	2.59662	1.87952	1.81017	2.06398	2.14905	2.49376	3.34892	2.06112	2.6809	2.7258	1.93844	2.61457	1.93038	1.25919	1.61775	2.86614	2.1793	2.12251	2.08553	1.91309	1.9147	2.59113	1.92791	1.75982	3.11652	1.99905
3220.72	2.47552	2.09738	2.50964	1.88506	1.93845	2.71391	2.12026	2.34684	2.54088	2.32264	1.96736	2.15006	2.63285	2.25558	1.82833	1.88104	1.95809	2.19993	2.19994	1.95801	2.43014	1.82257	2.76507	3.0492	1.62143	2.14396	1.57437	2.25419	2.14628	4.07476	2.51194	3.16997	2.29186	2.01494	3.13715	2.29844	1.06112	1.44709	2.97713	2.15463	1.71579	1.60083	1.58951	2.61134	2.85356	2.45688	1.93097	3.30429	2.52994
3232.54	1.11641	0.504515	0.740827	1.65023	1.97529	1.33836	0.57621	0.549034	1.04613	0.687774	1.42244	0.865273	0.754652	0.856973	0.444012	1.33647	1.16835	1.7217	0.672743	0.82642	1.49093	1.45681	0.864987	0.848997	1.1117	1.10139	1.16151	0.641924	0.645724	1.63177	1.32051	0.648039	1.50624	1.31428	0.915093	1.29694	0.446765	0.973566	1.25987	0.689812	0.659222	0.796481	0.928643	0.713484	1.22538	0.859735	0.927016	0.710706	1.00405
3234.95	0.921866	0.895153	1.02554	1.12091	1.3969	1.49767	1.21849	1.19257	1.14409	0.701608	2.45517	0.96082	1.35033	0.944765	0.522807	1.03581	0.646191	1.17315	0.979647	0.727263	1.85847	1.88243	1.09332	1.34029	0.475088	1.44822	0.608486	0.970694	0.802507	2.12276	1.424	0.770492	1.50738	1.57573	1.99693	2.01915	0.737691	0.881309	1.10905	1.11712	1.03663	0.83217	0.691233	1.2863	1.29614	0.888516	0.591268	1.20754	1.75968
3237.33	1.52528	1.08098	0.773452	1.8296	1.61453	1.26577	1.86309	1.1034	2.08527	1.61195	1.76422	1.63027	1.70214	1.14446	1.18353	1.12109	1.83686	1.9132	1.37171	1.34039	1.37892	1.7207	1.95587	1.66193	1.6333	1.01045	0.843943	1.25555	1.13012	3.3326	0.935172	0.972316	1.19989	1.40962	1.95872	1.62916	1.15955	0.843563	1.39699	1.49734	1.17151	1.79251	1.19854	1.81324	1.40251	0.755704	1.02278	1.24852	1.20865
3240.3	2.20242	1.39862	1.22277	2.08297	2.30623	2.54158	1.411	1.96634	1.4613	1.39954	2.62856	2.14947	2.89354	1.48745	1.48037	1.8123	1.9318	1.9768	1.87548	2.81323	2.06917	2.52839	2.20654	1.42022	1.41304	1.74436	1.47491	1.75638	1.66373	3.27548	1.87984	1.23667	1.93865	1.60841	2.07008	2.12837	0.802647	1.21937	1.83727	2.0521	1.28098	1.24811	1.65737	1.15955	1.94681	1.52183	1.5149	2.09389	1.83313
3243.73	2.24286	1.67504	2.16456	2.11418	1.9144	1.80152	1.58545	1.66117	2.29982	2.09844	2.05777	1.21554	2.66745	1.34165	1.3668	1.71391	2.09216	3.12295	1.58524	1.75572	2.46327	2.08166	1.9528	2.45732	1.4462	1.79624	1.4023	1.85718	1.76936	2.51535	1.38676	1.70169	2.07961	1.24455	2.85014	2.28592	0.832611	0.766737	1.84586	2.14628	1.94969	2.48085	1.42593	1.99589	2.00874	1.59124	1.91349	2.22856	2.39877
3247.5	1.81899	1.42345	1.47894	1.80899	2.00358	2.62966	1.29131	1.29078	1.44128	1.39969	2.30266	1.51781	3.34084	2.25997	1.17431	1.38473	2.00004	2.17362	1.62938	1.58882	2.07248	2.16353	1.81428	1.83227	1.36402	1.99125	1.952	1.61465	1.8603	1.47082	1.25089	1.2761	1.80106	1.85374	2.55556	1.76762	0.852988	1.52796	1.76066	2.22281	1.804	1.8321	1.70357	2.54602	2.43488	1.85419	1.30031	2.63195	2.66963
3252.69	1.31494	0.834037	0.890555	1.15514	1.57908	1.30985	0.897213	1.29793	1.50776	1.03237	1.86106	1.58355	0.837853	1.38395	1.00475	1.46372	1.49182	1.5782	0.77263	1.06708	0.887746	1.22534	1.20837	0.940464	1.33257	1.86547	0.784856	1.64322	0.899982	2.61674	1.48344	1.51196	2.56493	0.87441	1.55494	1.305	0.718534	1.00704	1.50262	0.967306	0.966292	0.976072	1.16346	1.46929	1.07137	1.38707	1.73728	1.16151	0.838526
3256.7	0.911498	0.886814	0.844343	1.31021	1.47968	1.65854	0.865528	0.849576	1.0971	1.04809	1.02667	1.37981	1.33557	1.46664	0.616096	1.11122	1.44981	1.47908	1.12179	1.33631	1.71535	1.8196	1.09122	1.04172	1.06208	1.30328	1.00584	1.09195	0.715636	2.3322	1.03178	0.601861	0.707441	1.37387	1.32365	1.77557	0.879664	1.13456	1.53788	1.28872	0.971751	0.862005	0.928009	1.13268	0.951341	0.748765	1.36541	1.16498	1.2103
3261.67	1.70792	0.940363	2.18268	1.31906	1.2287	1.72713	1.68308	1.24396	1.19884	1.73803	1.34718	1.94127	1.80413	1.41041	0.919077	2.18294	0.974734	1.72995	2.19093	1.84629	2.31353	1.74285	2.5056	1.93887	0.907616	0.871084	1.20478	1.25611	1.96946	1.78901	1.74915	1.47052	2.22819	2.07616	1.64552	2.52848	0.947936	1.40293	1.34986	2.26108	1.22241	1.24141	1.29531	1.82129	1.74104	1.45696	1.13541	1.3372	1.57989
3264.3	2.46605	1.45573	2.29599	2.41962	2.15393	2.63302	1.5237	1.71686	2.18945	1.22533	2.31035	1.45098	2.88317	1.40677	1.71661	1.5656	1.3674	2.20873	1.39992	2.14036	1.77391	2.23126	1.6336	1.56713	1.34215	0.904716	1.21791	2.04832	1.61112	2.27364	1.51787	1.36974	1.884	1.4458	2.01126	1.84032	0.910385	1.05772	1.75217	1.69401	1.81187	1.7478	1.69205	1.75668	2.18894	1.41548	1.42796	1.7136	2.11952
3274.06	1.63747	1.41068	0.678441	1.07778	1.41415	1.53188	1.12342	0.890402	1.10271	1.02984	1.51327	1.30162	2.03017	0.925672	0.915879	1.16747	1.74026	2.06204	0.829189	0.809508	1.07098	2.47246	1.14144	1.00066	1.02428	1.46863	1.80345	0.861968	0.810103	1.80564	1.6352	0.848983	1.26617	1.37492	1.68569	1.84308	0.560989	0.770663	2.00646	0.874016	0.890018	1.25242	0.943774	1.7143	1.47042	1.40452	1.17665	1.36674	1.62005
3277.64	0.827393	1.20515	1.15665	0.926613	1.44936	2.28227	1.33894	1.2356	0.854901	0.867104	1.8016	1.03923	1.43089	0.920884	1.18518	1.27364	0.725289	2.39931	0.802284	0.987159	1.64016	1.62289	1.56121	1.25374	0.799194	1.31144	0.920855	0.954187	1.21331	2.55384	0.762325	0.879345	1.16763	1.29774	1.15021	1.22022	0.673392	1.15724	1.45359	0.934754	1.08192	1.02669	0.937435	1.52015	0.882125	0.998472	0.888433	1.16225	1.99245
3279.69	1.51201	0.95851	1.34272	1.95488	1.76425	1.71166	1.1273	0.940652	1.44241	0.94657	1.52069	1.65262	1.37252	1.14308	1.11597	0.720671	1.02813	1.69114	1.3387	1.80115	1.47925	2.06573	1.16583	1.81206	1.01875	1.49114	1.55084	1.50668	1.17939	1.80161	0.864585	1.36927	1.54176	1.18221	1.44608	1.57398	0.676783	0.787214	1.48615	0.852102	1.29213	1.11737	1.02178	1.09041	1.21439	0.972545	1.35438	1.28628	1.64044
3282.11	1.28686	1.53849	1.14422	2.27012	1.56012	1.18367	1.15139	1.42129	2.05069	1.37718	2.06503	1.55213	1.74985	1.18179	0.851596	1.27123	1.51062	1.34843	1.84866	1.80273	1.5159	2.17424	1.45687	1.31322	1.23402	1.4076	0.803218	1.15441	1.13564	1.28017	1.06177	1.05272	1.45286	1.2619	1.7465	2.01608	0.853522	0.733251	1.6093	1.64234	1.1791	1.05689	1.04736	0.453316	1.48027	0.762874	1.74296	1.52457	1.24717
3284.75	2.01891	1.89551	1.59471	1.23618	1.96538	1.84151	1.33335	1.08984	1.78777	1.70957	1.70006	1.62705	2.5512	1.55335	0.836487	1.88108	1.46017	1.92943	1.61541	1.50527	2.36162	2.55798	1.79099	1.6709	1.39486	1.70506	1.42113	1.77632	1.27113	2.33025	1.90489	1.11586	1.9217	1.94873	1.49147	1.85166	0.948766	0.870664	1.91212	1.66883	0.946393	2.08862	1.34349	1.40198	1.8942	1.49338	0.961353	2.09341	1.7158
3287.11	2.74991	1.34697	1.73166	1.60029	1.59377	2.45312	1.13347	1.40084	2.06794	1.83092	1.6817	2.05567	1.64921	1.44546	1.10034	1.04724	2.22361	1.65574	1.69146	1.40976	3.00268	1.60218	1.63686	0.935456	1.12638	1.16248	1.46202	1.87805	1.92465	2.94877	1.60842	1.84885	2.4843	1.77224	1.89258	1.46124	0.848421	1.21542	2.07379	1.87716	1.15881	1.78542	1.39897	1.96558	1.8559	2.05339	1.42327	2.06424	1.72601
3289.03	2.11699	1.08765	1.5529	1.88111	1.5269	2.53612	1.35534	1.80412	2.04492	1.70847	2.04895	1.66579	1.55141	1.59112	1.1058	1.39002	1.7101	1.54111	1.41296	1.25533	2.02259	2.14663	1.61883	1.76059	0.921101	1.43177	1.3067	1.94142	1.71787	2.8102	1.54784	1.42069	2.00929	1.49832	1.61003	1.61101	0.721678	1.00328	2.40572	1.84641	1.83777	1.83363	1.2673	1.73752	1.93763	1.20357	1.71396	1.89485	2.44751
3292.11	1.34161	0.633269	1.17041	1.05338	1.76847	2.22673	1.66853	1.17386	0.980044	1.08255	2.1774	1.5235	2.23395	1.38721	1.0622	1.36147	1.25515	1.77746	0.802697	0.990199	1.01937	1.8734	1.6563	1.08246	1.02727	1.45629	1.29104	1.15612	1.21041	2.3945	1.09321	1.77287	2.15929	1.20813	1.94252	1.77165	0.798692	0.752541	1.7726	1.24725	1.40087	1.26817	1.32922	1.71663	1.51065	1.46906	1.24816	1.5026	1.94548
3294.01	1.00576	1.43073	1.47154	1.6205	2.04759	1.71778	1.55349	1.02879	1.38165	1.05483	2.83251	1.43443	1.90808	1.27383	0.842518	1.26581	0.981827	1.67807	0.977161	1.3751	1.40772	1.26627	1.64883	0.98285	0.654596	1.34935	1.41777	0.979248	0.879568	2.46757	1.43562	1.31918	1.68368	1.54469	1.42971	1.70396	0.617163	0.543393	1.56621	1.45646	1.17343	1.32623	0.921234	1.7635	1.3769	1.16652	1.12091	1.60339	1.80588
3295.85	0.976211	1.76761	1.14433	1.41874	1.58122	1.48415	1.21169	1.50719	1.60296	1.09329	1.41687	1.0481	1.54583	1.09117	1.3141	1.19521	1.36784	1.39808	0.983293	1.4176	2.29067	1.06631	1.16105	1.25687	0.827186	1.42312	1.35772	1.0982	1.57503	3.26162	1.738	0.739987	1.24295	1.13631	1.4311	1.49298	0.840095	1.129	1.04255	1.27316	1.35416	1.29727	1.00415	1.59362	1.13461	1.0762	1.28549	1.84362	0.896846
3298.67	1.40072	1.52454	1.2319	1.18149	1.45078	0.967336	1.06232	0.811937	2.15494	0.936428	1.88096	1.85103	1.94017	1.12481	1.14926	1.33947	1.26672	2.07144	0.659425	1.14096	1.23613	2.23732	1.44223	1.10725	1.25061	0.958094	0.438321	1.21227	1.2466	1.57833	1.23547	0.850373	1.43007	1.07582	1.52067	1.32415	0.940157	0.825663	1.72343	0.994142	0.678992	1.70767	1.51615	1.56231	1.45805	1.41092	0.979496	1.98589	1.5245
3314.66	3.0277	2.29951	2.78843	2.32185	3.336	2.38094	2.60585	2.76571	2.32785	2.44557	4.06182	2.17968	2.33469	3.0318	2.2875	3.17768	1.77512	2.57878	2.76693	2.33828	2.19207	4.15469	2.60097	2.99515	2.37345	2.2649	2.13517	1.47577	1.88872	3.03046	2.72541	2.8213	2.94942	2.05885	2.97717	2.32469	2.03374	1.78977	2.9926	2.58807	1.53397	2.94205	2.66942	3.28713	2.87296	1.97161	2.96084	2.35493	2.48454
3325.87	1.19483	1.49102	1.39442	1.62831	1.21152	2.56989	0.986431	1.43549	0.845912	0.873023	1.20478	2.04626	1.97971	1.09033	1.37732	1.949	1.27031	2.38986	0.903108	1.33958	2.20368	1.83608	2.07404	2.0486	1.41861	1.20425	1.10406	2.03717	1.20022	2.60878	1.55688	1.44713	1.17745	1.77107	2.66849	1.85254	0.725672	1.12154	1.79637	1.15574	1.46324	1.46653	1.84042	1.02338	1.34795	1.06543	1.46853	1.40899	2.17131
3330.03	1.60474	1.58249	1.26213	2.04052	1.80755	3.26286	1.59802	0.865165	1.48533	1.6377	1.38741	1.61183	1.68417	1.52079	1.4583	0.92854	1.5973	2.3975	1.58232	1.5545	1.50228	1.46018	1.75241	1.33513	0.607693	1.28172	1.59972	1.48768	1.72798	2.54689	1.16374	1.2861	1.95488	1.54262	1.9705	1.37659	1.03323	1.31387	1.88424	1.92025	1.12873	1.23511	0.849187	1.90554	1.73411	1.28013	1.24374	1.46133	1.43678
3333.63	1.21618	0.666346	0.811819	1.09027	1.03056	1.41143	1.03732	0.685706	1.24899	1.1018	1.19741	0.847135	1.9341	0.911119	1.13518	0.932684	1.19834	2.08343	0.736058	0.954911	0.891483	1.50721	1.09052	0.794528	0.967381	1.61941	0.766576	0.979004	1.09821	2.30023	0.812116	1.08983	1.46703	1.16554	1.53132	1.41922	0.591816	0.788889	1.34649	1.16315	0.932364	0.998022	0.896843	1.11986	1.75831	1.31303	0.992609	1.41893	1.33401
3337.83	0.769845	1.26451	0.855024	1.37347	1.28831	1.29071	0.905686	0.674161	1.18732	0.881751	0.986227	1.21847	1.50936	0.986105	0.658229	1.17312	1.05072	1.12325	0.782273	1.06857	1.39193	1.43363	1.25312	1.55513	0.997191	1.08701	0.61685	1.32363	1.06594	1.84032	1.21129	0.873633	1.13127	1.18119	1.13295	1.24596	0.465465	0.487	0.919297	1.17708	0.841927	1.36299	1.1383	1.0926	1.27902	0.622722	0.922367	1.24704	1.65016
3343.05	1.46834	0.930036	1.13081	1.01636	1.44407	1.81974	1.54712	1.36145	0.812331	1.33018	1.04158	2.37737	1.34549	1.51785	1.38793	1.38354	1.15248	1.31494	1.70499	1.66969	1.39515	1.31304	1.19831	1.56172	1.07562	1.19703	0.862273	1.04087	1.30357	1.91635	1.49303	0.741263	1.40589	1.40097	1.4772	1.82071	0.734661	0.966818	1.46765	1.80092	1.93242	1.25595	0.791158	1.57895	1.77697	1.27027	1.51466	1.42763	0.948203
3347.5	1.28212	1.59345	1.59347	1.90967	2.08217	1.93817	1.46816	1.55097	1.74472	1.18415	1.6751	1.2225	1.72184	1.25546	1.80294	1.58998	1.48513	2.02962	1.70429	1.39271	1.31673	1.90728	1.78412	1.57435	0.810674	1.42171	1.11549	1.19717	1.52713	1.63411	1.08552	1.50715	2.30249	1.56777	2.09617	1.89995	1.30646	1.46598	1.58047	0.980965	1.41357	1.22218	1.31529	0.691342	1.95766	1.19617	1.80073	1.09352	1.41918
3351.69	0.978172	1.2093	1.20466	1.54607	1.74982	2.10036	1.276	1.07731	1.87644	1.35979	1.81261	1.11644	1.8033	1.20357	0.958121	1.72333	1.7011	1.61382	1.33828	1.24171	1.58264	1.69669	1.57881	1.89551	1.35959	1.23867	1.91072	1.44646	0.880782	2.03773	1.68857	0.951998	1.38997	1.28474	1.85671	1.53216	1.05998	1.12651	1.79002	1.29949	0.856294	1.5932	1.16079	1.32915	1.08346	0.986789	1.64325	1.85348	1.29279
3355.95	1.32007	0.848872	1.19914	1.03962	1.41379	1.49566	0.750132	1.08948	1.30922	1.15688	1.62343	1.78487	2.05892	1.15977	0.989313	0.874131	1.45268	1.5201	0.739847	1.19041	1.42637	1.96488	1.8482	0.854964	0.734095	0.986811	1.21411	0.922484	1.38113	2.76598	0.873115	0.679039	2.20681	1.48102	1.23341	1.58373	0.716119	0.48013	1.11179	1.40798	1.0551	1.15296	1.29952	1.42691	1.00959	1.60671	1.72378	1.60608	1.62654
3363.86	1.49371	1.24687	1.51299	1.39962	1.1453	1.75072	1.41852	1.32715	1.65688	1.56978	1.43615	0.938874	2.25479	1.19626	1.47161	1.17405	1.4157	1.83083	0.996142	1.25321	1.46222	2.03007	1.81815	1.39351	1.0514	1.41832	1.15799	0.956878	1.35006	1.85773	1.87956	1.17796	1.33466	1.15354	2.06666	1.65283	0.899048	0.763711	2.29601	1.80099	1.37508	1.07982	1.48196	1.49303	1.26967	0.86809	1.12961	1.61327	2.07499
3366.34	1.886	1.6018	1.87071	1.30665	1.57583	1.78836	1.33412	1.93775	2.45502	1.2956	2.14	1.93323	2.67865	1.68968	2.12844	1.71285	1.73074	2.13623	1.13549	1.88304	2.40582	1.6865	1.87253	1.13807	1.12451	1.55391	1.1898	1.52697	1.40723	2.7291	1.56746	1.67066	1.96959	1.33435	1.86897	2.42595	1.4456	1.09496	2.09713	1.09816	1.75764	1.43222	1.75799	2.1755	1.5027	1.57176	2.04747	2.12271	1.86963
3368.46	1.77579	2.1867	1.59249	2.46577	2.30847	2.16197	1.50946	1.82311	2.41119	1.81963	1.9185	2.18288	2.08352	1.49271	1.2939	1.43241	1.65133	2.02297	1.23361	1.90809	2.15398	1.72979	2.32452	2.07944	1.62999	1.98328	1.49004	1.91507	2.27445	3.21414	1.74999	1.59499	2.35155	1.66365	1.84087	1.88101	1.29631	1.24369	2.22756	1.83418	1.58165	2.34732	2.03405	2.10951	1.53293	1.89592	1.81884	2.17976	2.35283
3390.94	1.10453	0.834569	1.36214	1.40922	1.55569	1.93834	1.16565	1.02795	1.43451	1.1591	1.93856	1.71219	1.77476	1.27821	0.785069	1.18196	0.937671	1.4657	1.17214	1.23074	0.99418	1.46496	1.48385	1.33727	1.31251	1.53839	0.855929	1.00904	1.29389	2.78092	1.16668	1.39981	1.8282	1.37066	1.44685	1.62014	0.909881	1.0464	1.36788	1.99323	1.26127	1.20263	1.80229	1.32639	1.41304	1.15384	1.05098	1.39784	1.85061
3393.98	1.79011	1.30543	2.05332	1.97947	1.35987	1.94498	1.49841	1.60909	1.85977	1.82633	3.44248	2.37412	1.81048	1.91066	1.62319	2.09209	2.33291	2.68509	1.85799	1.4541	1.69006	3.01424	1.75792	1.53205	0.909778	1.58254	2.50269	1.86928	1.58479	2.26353	1.78757	1.28885	1.47451	1.45656	2.01431	2.93969	1.00853	1.4362	1.79649	1.50291	1.32003	2.05977	1.61237	2.30959	1.58721	1.08388	1.70423	1.8636	2.56365
3406.77	1.38391	0.631938	0.858292	0.861455	1.34696	1.24404	0.725363	0.776029	0.947527	0.513857	0.99417	0.971014	1.05499	0.53993	0.542787	1.04277	1.39953	1.50663	0.610893	0.819945	1.04715	1.09898	1.08005	0.754343	0.580997	1.00675	0.652338	0.748123	0.803975	1.48139	0.934151	0.60102	0.910133	1.10996	1.04182	0.871534	0.690752	0.391229	1.37293	0.792897	0.592824	0.817682	0.747472	0.936503	0.901067	1.15552	0.761801	0.875002	0.797377
3413.14	1.708	0.767321	1.10644	1.07232	1.19625	1.62005	1.12934	1.0272	1.28817	0.969207	1.27343	0.90024	1.68006	1.14012	1.30135	0.738527	1.30457	1.14921	0.856514	0.9411	2.01033	1.73582	1.14753	1.55219	0.519591	1.20904	0.923291	1.24788	1.24087	2.17661	0.820878	0.694134	1.28225	0.961167	1.59814	1.38894	1.14454	0.85243	1.85521	1.16041	1.09087	0.748292	1.04573	1.1875	0.945443	1.1783	0.772361	1.09547	1.4964
3417.84	1.59826	1.16776	1.164	1.60543	1.81144	1.34764	1.08525	1.34592	1.47426	1.41251	2.14631	1.56495	1.56131	1.77786	0.854267	1.65991	1.61129	1.74159	1.35606	1.64288	1.57204	2.25206	1.6115	1.74527	1.27577	1.07191	1.14479	1.48821	1.14595	2.07274	1.14299	1.25029	1.70472	1.31855	1.46975	0.909506	0.876402	0.927079	1.16588	1.04952	1.22107	1.81546	1.08304	1.47709	1.62641	1.04529	1.276	1.41774	1.30095
3425.64	0.594706	0.856666	1.02701	1.87309	1.19268	1.60476	0.945329	1.15472	1.57256	1.3178	1.57724	1.2593	1.46444	0.925259	0.845123	1.08645	1.28645	1.51071	0.782164	1.61054	1.45141	1.22143	1.58713	0.847384	0.687934	1.5075	1.1635	0.783312	1.0698	1.47625	1.12858	0.729555	1.17251	1.24075	1.28743	2.18619	0.71747	0.853962	1.22101	1.70734	0.867888	0.95941	1.33955	1.14118	1.58964	0.434056	1.15901	1.29327	1.37476
3429.01	1.77833	1.0396	1.37802	1.09142	1.506	1.14068	1.10994	0.879423	1.26638	1.57464	2.76109	1.00677	2.28198	1.65316	0.970592	1.08203	1.71841	1.47991	1.22265	1.18387	1.66172	2.24961	1.25242	1.17017	0.928609	1.7184	1.16795	1.3658	1.16902	2.74089	0.914486	1.54183	1.71982	1.34871	2.18398	1.63953	0.769956	1.06038	1.51284	1.03443	1.4526	1.41289	1.15498	1.89038	1.69816	1.26518	1.569	1.41911	2.14192
3434.44	1.30116	1.19959	1.07929	1.68963	1.17401	2.21566	0.992522	0.899693	1.31374	1.28426	1.48183	1.19872	1.28224	1.06228	1.01158	0.879776	1.59728	1.14032	0.872836	1.58164	1.31178	1.28017	1.15672	0.946467	0.931037	1.19917	0.918725	0.817371	1.11232	1.18229	1.43455	1.01521	1.7873	1.20351	1.65389	1.28295	0.861692	0.786608	1.16236	1.03217	1.24757	1.31674	1.23124	1.71502	1.52115	1.30111	1.64353	1.14071	1.49925
3438.58	1.52021	1.09255	1.2987	1.41274	1.00522	1.5027	1.35101	1.09671	1.29703	0.750935	1.65169	1.41642	1.63703	1.01183	1.3322	1.42073	1.00112	1.38302	0.861714	1.25541	1.35984	1.73426	0.996001	0.775725	0.969836	1.04886	1.03313	1.04007	0.784237	3.09186	1.15284	0.885702	1.37104	1.28034	1.55672	1.19784	0.830154	0.77826	1.24143	0.823967	1.09682	0.903667	0.754978	1.10201	0.873393	0.854793	0.746619	1.44407	1.04306
3442.9	1.4404	1.1993	1.00213	1.86176	1.55248	2.35618	1.16255	1.19656	1.16514	1.43416	1.89747	1.39226	1.98809	1.50774	0.973828	1.54455	1.52282	1.9204	1.53597	1.36376	2.37517	1.35617	1.86813	1.53682	1.0699	1.22931	1.57597	1.80413	1.39784	2.19744	1.38501	1.40181	1.45781	2.05765	1.69069	1.88038	1.0214	0.932367	1.50206	1.64172	1.06747	1.32373	1.46092	1.16097	1.6529	1.23156	1.52658	1.90243	2.06607
3447.5	1.04679	0.884755	1.27256	1.53708	1.21779	1.86346	1.09768	1.06342	1.3697	0.883782	2.02341	1.33387	1.75446	1.34046	0.866908	1.07826	1.32639	1.75517	1.3975	1.71077	1.92144	2.30572	1.43183	1.3884	0.654556	0.78979	1.04736	1.33909	1.35406	1.92907	1.56455	1.59958	1.80869	0.927797	1.6743	1.47452	0.59897	1.23425	1.42672	1.47761	1.01332	0.897839	1.0147	1.51823	1.8846	1.34195	1.32482	1.80831	1.15911
3461.36	1.4819	1.20244	1.35936	1.62366	2.07824	1.74748	1.16112	0.859311	1.41883	1.35182	1.66909	1.27859	1.31984	1.38972	0.941887	1.5399	1.45926	1.76673	1.01849	1.06173	1.29498	1.43304	1.67589	1.34071	1.07824	1.72842	0.805836	1.25409	1.24681	1.31202	0.913004	0.748584	2.81239	1.46277	1.38506	2.12943	0.980188	0.616317	1.23068	1.42975	1.17966	0.906358	1.58103	1.35196	1.71779	1.11253	0.999138	1.34045	2.46422
3463.58	1.62123	0.997081	1.22481	1.69056	1.98173	2.58026	1.71091	1.14533	1.67215	1.65923	1.80008	1.5879	1.81308	1.09272	1.10962	1.37435	1.54695	2.29322	1.54736	1.67721	1.80094	1.29684	1.94243	1.52367	1.00539	1.47628	1.17833	1.70723	1.71326	1.7652	1.30037	1.44288	2.66977	1.20209	2.24486	2.07704	0.954157	0.770687	1.45138	1.09377	1.35527	0.985961	1.55821	1.49093	1.57068	1.53827	1.24073	1.50618	2.29724
3465.82	1.83445	0.882015	1.69321	1.97935	2.35812	2.41957	1.10838	1.81145	1.54439	1.40946	2.01125	1.82704	2.62361	1.95919	1.35673	1.27809	2.05505	2.30225	1.31517	1.91381	1.28524	1.47226	1.66164	1.17092	0.753525	1.32394	1.48747	1.93961	1.66342	2.12621	1.77744	1.65267	1.91796	0.82114	2.08128	2.0131	0.671795	0.627881	1.66133	1.56934	1.32196	1.79627	1.24935	2.09375	1.99042	1.27021	1.44354	2.2458	1.98323
3469.55	0.956865	1.16261	1.2019	1.79628	1.88467	1.60849	1.07337	1.63504	2.07096	1.72692	2.23754	1.45147	1.61445	1.44284	1.03597	1.89064	0.946457	1.49133	1.43198	1.73976	2.20558	1.72884	1.41312	1.17016	0.802623	1.45645	1.06143	1.19793	1.38459	2.99315	1.56712	1.16432	1.50075	1.59313	2.00492	1.35044	0.901096	0.909636	1.40759	1.34484	1.468	1.29254	1.19425	1.33955	1.37716	1.04013	1.55809	1.47526	1.62335
3483.45	1.3485	0.697024	1.22266	1.60511	1.49227	1.8898	1.36619	1.07975	1.64417	1.44034	2.1644	1.18132	1.65717	0.812214	1.4637	1.15734	1.71968	1.32784	0.935776	1.01441	1.57893	1.82485	1.39853	1.5873	1.44265	1.3628	1.41369	1.36393	1.46116	2.11863	1.51569	0.856993	1.91035	1.21639	2.04126	2.29299	0.815104	1.01091	1.37597	1.46142	1.47252	1.31379	0.978078	1.57514	1.75084	1.12209	1.1651	1.96186	1.18308
3489.36	1.00476	1.02217	1.33442	0.797652	1.67357	2.49588	0.980092	0.877277	1.41797	1.44379	1.66373	1.39128	1.38896	1.28762	0.945203	1.28125	1.91887	1.56527	1.14927	1.56053	1.77487	1.43378	1.06849	1.59079	0.690294	1.449	0.899194	1.29692	1.20797	2.06403	0.954288	1.36089	1.48275	1.27433	1.98288	1.30351	0.772744	0.568333	1.37718	1.30529	1.21191	0.917599	1.41241	0.992649	1.67345	1.20656	1.4041	1.663	1.13717
3491.95	0.997559	0.716633	0.599656	1.2519	1.36635	1.26142	1.09842	0.657055	0.960567	1.33332	1.87694	0.572254	1.10678	1.48632	0.843659	1.55953	1.58741	1.44221	1.28637	1.09479	0.983501	1.6794	1.41466	0.69266	0.427503	1.22662	1.11401	1.00106	0.965778	2.58863	0.724979	0.897224	1.02309	0.935702	1.44509	1.57207	0.57474	0.558946	0.897115	1.0009	0.72619	1.0158	0.965873	1.23835	1.22763	1.00137	1.54564	1.40969	1.59657
3496.06	0.876322	0.814485	0.825316	0.971264	1.40047	1.69002	0.663411	0.837197	1.03795	0.760046	0.986449	1.3206	1.37322	0.746232	0.550833	0.931547	0.750015	1.49336	0.520268	0.885332	1.28517	1.37587	1.18443	0.80984	0.678759	1.07889	0.804511	0.972897	0.711321	2.58726	0.976622	0.768751	1.42987	1.8656	1.33109	0.952556	0.580394	0.560006	1.26659	1.64356	1.08371	0.723506	0.900622	0.780222	1.01375	1.01008	0.670118	0.76644	1.13915
3504.8	1.07936	1.06106	1.23616	1.30522	1.62455	2.42441	1.90119	1.2444	1.57107	1.56526	1.92695	1.3334	1.60586	1.18152	1.03614	1.26938	1.07744	1.34877	1.28622	1.19733	2.31055	1.59469	1.40442	1.6117	0.909938	1.95636	1.38098	1.30002	1.53451	2.52608	1.06743	1.78237	1.84339	1.2763	1.60533	1.73793	0.990732	0.914358	1.90038	1.56952	1.34663	1.22713	1.00462	1.06846	1.77487	0.928282	1.15253	1.23784	1.64551
3506.92	1.66091	1.15329	1.43136	1.73607	2.35808	2.12314	1.80158	1.47704	2.06305	1.41414	1.74483	2.16675	1.97334	1.39566	1.29276	1.91672	2.04922	2.03819	1.1866	1.81152	1.57047	1.8987	1.53451	1.31119	1.33898	1.576	1.54198	1.73095	1.34864	1.52687	1.73658	1.63909	3.29999	1.07823	1.74295	2.15361	0.980598	1.00541	1.65363	1.66196	0.997753	1.97286	1.20148	1.40125	1.45475	1.35424	1.46382	2.07366	1.98518
3509.07	2.2852	1.44288	1.83863	1.58632	1.81357	2.09666	1.60555	1.74973	2.14161	1.48513	1.7658	1.57035	2.35348	1.94859	1.43989	1.46252	1.77335	2.53156	1.15225	1.82061	1.45191	2.01242	1.88845	1.77192	1.28024	1.371	1.22909	1.92944	1.45707	3.13868	1.68907	0.941697	3.07161	1.85231	2.43166	1.80743	1.20242	1.29006	1.38422	1.84728	1.55834	1.79987	1.50641	2.21102	1.53135	1.7628	1.77166	2.80978	2.70935
3513.21	1.18297	1.09329	1.34001	1.46062	1.86178	2.32585	1.09033	1.11374	1.4747	1.21887	1.80011	1.14923	1.72128	1.84236	0.976147	1.20899	1.46883	1.35565	1.47833	1.50329	1.81662	2.0279	1.30808	0.882388	0.818948	0.977521	1.73558	1.07039	1.31043	2.13823	1.18719	1.26994	2.56	1.61426	1.95636	1.68695	0.592635	0.806841	1.52687	1.11039	1.45938	1.3712	1.32747	1.10764	1.73381	1.49667	1.41369	1.9965	2.03514
3516.37	1.34036	1.44837	0.9542	0.845582	1.12821	1.55897	0.999351	0.784543	1.17459	0.982824	1.478	1.06511	1.6459	1.17084	0.927997	0.742591	1.11514	1.78937	0.95743	0.828318	1.44752	1.33131	1.21542	1.19703	1.21637	1.18793	1.03197	0.863811	1.08841	1.61007	0.839529	1.13037	0.998672	0.997902	1.48549	0.97692	0.588865	0.633402	1.36057	1.31504	1.10613	0.819706	0.968075	1.02688	1.59414	0.792429	1.06914	0.984597	1.26176
3523.45	0.827313	0.864461	0.731324	0.854155	1.4492	1.31251	1.00271	0.641386	0.801615	0.891096	1.1488	2.06413	1.18898	0.977425	0.662862	0.834059	0.805327	1.53827	1.0716	1.14459	1.4808	1.88309	0.880675	1.15904	0.850062	1.37463	1.21035	0.745033	0.842656	1.2395	0.964686	0.813821	1.47276	1.22555	1.70441	1.69779	0.450915	0.539128	1.78792	1.23205	1.2333	1.23566	0.965454	0.869771	1.17355	0.730897	0.941058	1.41853	1.13097
3528.66	1.06255	1.03951	1.24785	1.11656	1.83664	1.84703	1.00748	1.20146	1.42814	1.17064	2.02592	1.65519	2.01836	0.964171	0.89072	1.30021	1.50174	1.21344	1.56867	1.02734	1.34058	1.76621	1.64794	1.39491	0.868112	1.06832	0.909542	1.53	1.28326	2.29223	0.844526	0.907613	1.54772	1.45546	2.0423	1.5104	1.18766	0.793374	1.24516	1.0618	0.897371	1.11335	1.05506	1.06478	0.981388	0.90328	1.27537	1.25371	0.912719
3531.61	1.54979	0.861494	0.91663	1.30495	1.39037	1.69647	0.922576	1.1566	1.65377	1.15356	1.33396	1.09631	1.63408	1.27716	0.714268	1.27622	1.46443	1.48797	0.988103	1.58767	1.29811	2.01874	1.40586	0.833421	0.913775	1.13986	1.35153	0.798791	1.09952	1.77482	1.15107	0.77593	1.94625	1.53209	1.55398	1.32234	0.773978	0.60747	1.28796	1.35531	1.25332	0.937862	1.15817	1.60988	1.50169	1.33233	1.73772	1.59206	1.75023
3537.06	1.30726	0.925349	0.982911	1.7294	1.01868	1.66256	0.779318	0.681109	1.25866	1.13359	1.47046	0.969168	1.33697	0.905334	0.82642	0.969305	1.13558	1.00684	0.942246	1.59403	1.1672	1.70558	1.29459	0.923377	0.646351	1.03004	0.545712	1.0965	1.25148	2.06962	0.960517	0.669291	1.2548	1.26237	1.22327	0.952158	0.671737	0.737851	1.48196	1.23412	0.750741	1.26263	1.00694	1.07537	1.12023	0.971655	1.05754	1.62597	1.00625
3550.77	1.64805	0.974987	1.50383	1.98351	1.74151	2.74063	1.9618	1.74287	2.11262	1.95884	2.11143	1.37643	2.68044	1.82193	2.02206	2.23225	2.56108	2.40596	1.93448	1.52134	1.30063	2.41772	2.61447	1.50718	1.38858	1.48607	2.32417	1.67272	2.17602	2.23209	1.87798	1.49014	2.93528	1.92851	2.79911	2.19615	1.26866	1.19238	2.18909	1.50886	1.51953	2.17871	1.86003	2.12513	2.02	1.62609	1.63251	2.37629	2.2984
3554.33	2.12429	1.57452	1.77818	2.03009	1.67949	2.60289	1.91755	1.73972	2.877	1.8605	1.87112	1.30931	2.34797	2.61069	1.45353	1.73636	2.20284	2.6264	2.22168	2.44202	1.88757	3.31149	1.72454	1.89537	1.32444	1.54169	1.95393	2.05055	2.67735	2.64784	1.66553	1.77432	2.35569	1.69472	2.89901	1.69067	1.12139	1.46193	2.60388	1.65023	1.95801	2.0605	1.77409	2.87772	1.99931	1.44769	2.03431	2.78834	2.42869
3556.56	1.80937	1.12774	1.24297	1.68145	1.91316	2.47788	1.40415	1.4413	1.79562	1.91922	1.74572	1.33179	2.23858	2.46041	1.00348	1.0275	2.02722	3.0759	1.2543	1.6632	2.13761	2.23824	1.54697	1.27217	1.21792	1.32624	1.66952	1.69573	1.9289	2.77171	1.61828	1.49931	2.10758	1.68352	2.44934	1.58158	1.06685	1.22885	1.53411	1.52892	1.82426	1.87473	1.43322	2.59883	1.79702	1.33496	2.24725	2.06065	2.21777
3558.52	1.41093	1.198	1.50132	1.72656	1.83392	2.53266	1.59104	1.70859	1.69419	1.84258	1.88891	1.80508	2.51432	1.54275	1.44942	1.18471	1.76374	2.85422	1.53817	1.37847	1.23924	1.99256	1.5867	1.13729	1.10181	1.40134	1.17013	1.9997	1.36344	2.36492	1.28817	1.20635	1.69977	1.87085	1.93743	1.85971	0.754261	1.01097	1.91652	1.48278	1.40222	1.75391	1.40973	1.70133	1.60507	1.23754	2.19861	1.70491	2.37525
3573.55	1.07184	1.25617	1.0228	1.14467	1.79574	1.34242	1.16072	1.20113	1.09066	1.11258	1.73312	1.49473	1.4945	1.29167	0.943048	1.10527	1.55188	1.78268	1.08298	1.03533	1.32273	1.52451	1.30536	1.13334	0.683158	1.25573	0.975419	1.37494	1.21089	2.22747	1.969	0.891968	1.51948	1.2161	1.30805	1.48258	0.631174	0.733727	1.36045	1.9345	0.821475	1.65493	0.746415	1.15942	1.48236	0.887816	0.918828	1.88634	1.50284
3575.47	0.925391	1.11377	1.21455	0.544415	1.69888	1.71931	0.993339	0.961846	1.58486	1.218	1.65706	0.891607	1.99205	1.63723	0.976338	1.47723	1.28593	1.38742	1.26882	1.31856	1.02997	1.72783	1.37772	0.905784	0.778163	1.18164	0.84034	1.38539	1.18015	1.60138	1.13074	0.841645	1.88371	1.45502	1.28751	1.68883	0.618287	0.742874	0.75422	1.39114	1.2364	1.5326	1.00744	1.32596	1.41635	0.827584	1.55926	1.63656	1.54858
3580.58	1.6814	0.623158	1.17751	1.35962	1.38403	1.59136	1.40248	0.710829	1.28772	1.07128	1.25854	1.32326	1.41443	1.42886	0.590774	1.19962	1.07847	1.36631	0.889168	0.801349	1.43482	1.65028	1.05513	0.853556	0.953004	1.4103	1.24554	1.28678	0.941816	1.91415	0.892262	0.832616	1.68036	1.28177	1.6967	1.24382	0.688098	0.53945	1.04975	1.10969	1.0433	0.710856	1.20099	0.940522	1.16181	1.2751	1.38515	1.16153	1.28044
3588.91	1.00001	0.852062	1.20162	1.06916	0.93912	1.60506	1.20453	0.920892	1.32678	1.30329	1.0705	1.85222	1.56023	1.31761	0.937012	0.955486	0.738737	1.21433	1.29018	1.00616	1.60511	1.23126	1.31259	1.58891	0.850517	0.918272	1.1934	1.5056	1.30566	2.17939	1.19408	1.02955	1.74921	1.29324	1.35348	1.32805	0.792586	0.998279	1.88418	1.36346	1.11714	1.35011	0.771554	1.14966	1.12604	0.920063	1.14728	0.905776	1.3194
3590.75	1.07338	0.899612	0.947295	1.7639	1.38329	1.82049	1.34379	1.15101	1.30657	1.61543	1.26196	1.37472	1.49505	1.10447	0.979398	1.08558	1.05126	1.18648	1.48097	1.1157	1.66064	1.53833	2.02602	1.40653	0.899316	1.09652	0.955444	1.70317	1.23821	2.6724	1.08408	1.23113	1.49523	1.5673	2.28875	1.04041	0.768973	1.22663	1.36297	1.56088	1.14214	1.02866	1.10967	1.22321	1.12174	1.04442	1.31538	1.31504	1.67387
3594.06	1.94711	1.23282	1.00705	1.10203	2.0705	1.9916	1.28442	1.13372	1.32492	1.04747	1.59439	0.930763	2.34638	1.32689	1.35001	1.07096	1.83047	2.15436	1.0895	1.81168	1.21884	1.77421	1.96752	1.25575	0.656897	1.06565	0.85408	1.39229	1.4883	1.96362	1.27252	1.4488	1.48761	1.16368	2.08923	1.90577	0.720583	1.00824	1.77112	1.26375	1.00595	1.47999	1.30474	2.2616	1.42185	1.26719	1.41287	1.59026	1.38235
3599.19	1.3077	0.869552	1.01061	1.28606	1.29082	1.14469	1.39581	1.34382	1.36515	0.87127	1.07911	0.954775	1.35054	1.68159	0.980132	1.58795	1.48197	1.81224	1.437	1.18983	1.67719	1.17348	1.29087	1.15806	0.83534	1.20567	1.72409	1.29805	1.08146	1.16667	0.961691	1.03406	1.66848	1.13628	1.5633	1.62396	0.527101	0.571049	1.79474	0.725935	1.08194	1.10775	1.12937	1.10871	1.25489	1.14255	1.26976	1.65824	1.14671
3602.68	1.52224	0.850788	0.979179	0.894781	1.38316	1.19189	0.832859	0.724376	1.45273	1.11569	1.56046	1.52319	1.20649	1.30437	0.940854	1.27452	0.893185	1.28422	0.578252	0.884965	1.34809	1.42213	1.45634	1.40718	0.495708	1.06676	1.28149	1.19741	0.757577	1.93245	1.06394	0.786571	1.74953	1.0607	1.22782	1.00952	0.745194	0.681797	0.884695	1.02612	1.17139	1.48643	1.32942	1.04543	1.37619	0.731277	0.969392	1.16655	1.12917
3607.56	0.940164	0.738418	0.871154	1.03066	1.18768	1.3825	0.853883	0.843409	0.846786	1.04435	1.97842	1.40591	1.22324	0.743071	0.528699	0.823079	1.03262	0.864762	1.29672	0.751419	1.65425	1.19775	0.833759	1.03379	0.654038	0.958458	0.602188	0.562413	0.946346	1.78472	0.737	0.700708	1.16859	0.946603	1.13789	0.825427	0.723797	0.638875	1.14008	1.03403	0.881973	0.716827	0.669802	0.875022	1.00396	0.682958	0.796883	0.97984	1.1443
3610.36	0.931205	0.887036	1.02905	0.732591	1.2679	1.48702	1.37101	0.640392	1.42439	0.845204	1.7578	1.11927	1.16007	1.02547	0.76724	1.43291	1.06942	1.33461	0.708966	0.714667	1.16286	1.51316	1.07966	0.811523	0.661189	0.887753	0.854189	1.10778	0.784722	1.92856	0.896287	0.552271	1.41805	1.3136	1.19462	0.952941	0.484657	0.751957	1.1907	1.09516	0.850306	1.12201	1.04697	0.795013	1.1975	0.909024	0.738209	1.15985	0.933842
3614.07	1.16354	0.822049	1.28693	0.996003	1.47204	1.74247	1.14434	0.83692	1.11303	0.825109	1.41149	1.51308	1.62372	1.24551	1.22986	1.24107	1.07803	1.63786	1.01943	1.65089	1.0407	1.36972	1.1104	1.64617	0.643841	1.01543	0.76481	1.62536	0.959945	2.33675	1.20614	1.12033	1.26284	1.22686	1.28149	1.16476	0.768222	0.746317	1.3748	0.695734	1.14417	0.954114	0.913945	1.28825	1.33738	1.07793	1.27679	1.21264	0.970763
3616.8	0.785946	0.716705	0.688771	1.52234	1.34043	1.38015	0.96836	0.879636	0.90839	1.74152	1.27735	1.0702	1.568	1.13865	1.13019	1.05705	1.08472	1.51394	0.945257	1.60979	1.47397	1.77416	1.24259	0.928923	0.825078	1.14681	0.729727	1.17815	1.01399	1.51925	1.09942	1.00747	1.20055	1.09212	1.52118	1.59528	0.593171	0.58991	1.098	1.5553	1.02939	0.941593	1.13084	0.99531	1.15393	1.28399	0.737748	1.43368	1.55705
3623.23	1.1937	1.13657	0.999425	1.25312	1.22768	1.27333	1.37073	1.07556	1.02568	1.50306	2.14515	1.52294	1.21149	0.957304	0.852173	1.27827	1.12764	1.56635	1.02398	1.09067	1.54788	1.32234	1.60248	1.28944	1.1465	0.951488	1.36402	0.798867	0.959858	1.52278	1.05347	0.844025	1.66543	1.44301	1.68469	1.27652	0.556214	0.7806	1.40696	1.29852	0.722552	0.831588	0.95266	1.26498	1.4164	0.914052	1.5637	1.85016	1.55081
3629.26	1.08272	0.899415	0.961709	1.11279	1.22041	1.31987	0.942712	0.80099	1.46691	1.58081	1.28108	0.954501	1.70459	1.34544	0.832928	1.1537	1.45834	1.48329	1.12874	1.13813	1.23797	2.09427	1.16252	1.13212	0.639278	0.922158	1.02648	1.61395	1.25734	1.63968	1.23065	0.882415	1.32177	1.22396	1.43006	1.36063	0.523374	0.848514	1.40624	0.840503	1.1415	1.1574	1.22293	1.69849	1.06635	1.15828	1.36922	1.15458	1.36116
3631.35	1.15979	0.957081	0.831947	1.39676	0.916303	1.29501	1.36991	0.85116	1.06566	1.47566	1.50302	0.998502	1.34462	0.844505	0.777423	0.83523	1.32856	1.44973	0.905287	1.17939	1.47436	1.66634	1.1029	1.3629	0.91678	0.859974	1.19082	0.958436	1.18521	2.14751	1.18287	0.728087	1.46821	1.32665	1.29601	1.50157	0.435265	0.624068	1.03694	1.34008	1.06395	1.30391	0.842535	1.63693	1.2174	0.890811	1.16391	1.26202	1.56933
3633.77	1.53439	1.11972	1.04713	1.25794	1.51958	1.69639	0.772943	0.951461	1.54372	0.953423	1.53891	1.33717	1.20297	1.41781	1.092	0.774937	1.2862	1.25825	0.85298	1.55887	1.12804	1.46491	0.982349	0.721002	0.719338	1.0454	1.06954	1.20572	0.932002	1.83268	0.992201	0.89431	1.45659	1.43239	1.57605	1.24678	0.722866	0.739803	1.59273	1.02931	1.34349	1.10882	0.817294	1.12191	1.12591	0.836758	0.872212	1.13353	1.66658
3639.59	1.26598	0.954246	0.796278	1.12946	1.53632	1.6318	0.958346	1.16258	1.66646	0.8968	1.47152	0.812276	1.24995	1.16573	0.954244	1.00857	1.23683	1.41789	1.26123	1.67074	1.35872	1.67344	1.03778	1.0722	0.660006	1.31818	0.632975	0.984884	0.99492	2.02393	1.18433	0.918736	1.14367	1.55041	1.53283	1.67531	0.743412	0.811045	0.911611	1.16984	1.17192	0.849391	1.09951	1.22301	1.30262	0.657007	0.599552	1.27554	1.55047
3644.37	1.30147	1.30661	0.781004	1.31589	1.07852	1.3422	0.953468	0.741911	0.735026	1.34669	0.908826	1.1063	1.23388	0.761062	0.783253	1.3392	1.07239	1.29626	0.769827	0.726188	0.941076	1.83525	1.11699	1.52015	0.766201	0.927906	1.27868	1.11387	0.936871	1.59713	0.834097	0.665606	1.27005	1.08351	1.14929	1.11412	0.522285	0.557228	1.27098	1.02876	0.968751	0.932897	0.914631	1.34	1.25374	0.894164	1.34875	1.55078	1.60828
3648.11	1.37723	0.806245	0.9515	0.666204	1.1813	1.18599	0.945981	1.14912	1.06155	0.671212	0.976189	1.07978	1.26045	0.981833	0.702457	1.07696	1.41262	1.09229	0.860302	0.943481	1.52096	1.19414	1.4528	0.643499	0.629891	1.01073	0.949836	1.0219	1.06073	1.41299	0.897393	1.06541	1.12027	1.22723	1.72096	0.984694	0.633228	0.783073	1.80152	1.24951	0.698235	1.24181	0.823768	1.26133	1.04304	1.14107	0.691278	1.0702	0.885769
3656.29	0.834096	0.896188	1.06373	1.28898	1.73426	1.27017	0.732572	0.6188	1.03199	0.996051	1.56796	0.718894	1.15289	0.672892	0.594615	1.34378	0.845701	1.01666	1.24508	0.766057	0.903776	1.44288	1.00411	0.743642	0.979866	1.36345	1.10837	0.684824	0.905129	1.49108	0.889824	0.839472	1.40639	1.1076	1.11488	1.12357	0.669832	0.653207	1.53951	0.807055	0.734853	0.912991	0.852624	1.19785	1.7391	0.8779	0.964478	0.85048	0.921594
3658.61	0.784849	1.21005	0.76809	1.235	1.54506	1.36719	0.955576	0.904757	1.09698	1.04133	1.3382	1.63518	1.07461	1.17292	0.76901	1.60459	1.22493	1.43392	1.04883	1.13505	0.886426	1.07499	1.17497	1.20929	1.26797	1.02089	0.94084	0.8544	0.954803	1.20879	0.674605	1.17361	1.35199	1.41752	1.46195	1.26174	0.563334	0.900355	1.40211	1.02056	0.955	0.892364	1.00324	0.993429	1.30763	0.97798	1.21324	1.65082	1.61459
3665.23	0.84733	1.04527	1.28182	1.30217	1.08001	1.54877	1.06779	1.20754	0.944895	1.39266	0.871525	1.00574	1.50585	1.46602	0.860874	0.943654	1.12214	1.61189	0.866248	0.97757	1.01307	1.5373	1.13442	0.781636	0.669232	1.01054	0.951349	1.41081	1.50421	1.4794	0.699794	0.693999	1.46172	0.962701	1.11576	1.08928	0.704536	0.746094	0.87946	1.19249	1.00101	1.14341	0.963132	0.914385	1.31829	0.888367	1.10378	1.13001	1.47122
3674.42	1.01958	0.939611	1.16936	1.18627	1.21381	1.62259	0.902362	1.17949	1.14309	0.895934	1.62635	1.63114	1.07811	1.12906	0.797829	1.49703	1.05653	1.16979	0.871187	0.978847	1.44053	1.54049	1.48493	1.62915	0.960538	1.04864	1.195	1.03508	0.987103	1.76576	1.00572	0.790651	1.64576	1.48817	1.27343	1.35441	0.717582	0.668263	1.63583	1.21035	1.17339	1.018	0.882057	1.11651	0.865576	1.01565	1.11708	1.07356	0.962379
3676.65	1.44547	0.923751	1.40473	1.60184	1.62247	1.89429	1.56454	1.12021	1.31873	1.15451	1.49261	2.02417	1.83017	1.29321	1.80742	1.30637	1.3127	1.87711	1.29597	1.85909	1.7255	2.24594	1.76701	1.43278	1.26005	1.37397	1.42661	1.72075	1.20448	2.09594	1.49437	1.95517	2.28357	1.62132	1.51561	1.82409	1.11072	0.968337	1.99274	1.1596	1.13953	1.21842	1.41874	1.58071	1.61231	1.16906	1.87225	1.65585	1.51351
3685.27	1.26561	1.05615	1.45611	1.05522	1.18961	1.37462	1.04474	1.10239	1.71905	1.47166	1.02481	0.786632	1.73167	1.37869	1.38946	1.15983	1.6116	1.60295	0.811607	1.15241	0.865162	1.29798	1.14539	0.668427	0.811306	1.5979	1.37567	1.22302	1.27817	1.42066	1.15635	1.06584	1.41508	0.965124	1.71277	1.3546	0.476907	0.872395	1.2638	1.10533	1.22861	0.987495	0.839401	1.34366	1.30496	0.886048	1.17775	1.27796	1.64923
3689.14	0.770984	1.06572	0.979982	1.27101	1.31275	1.31739	0.841679	0.874499	0.864889	0.80943	1.34298	0.827406	1.34936	0.891342	0.994894	0.989603	0.811654	0.974019	0.898874	1.01581	1.57308	1.91716	1.10472	0.824439	0.801625	1.22666	0.716496	0.702699	0.993002	1.42936	0.870494	0.685835	1.1992	1.44086	1.14995	1.17399	0.727576	0.792763	1.24664	1.44351	0.852916	0.941122	1.05857	1.11047	1.38698	0.924077	1.24244	1.23489	1.12633
3692.91	0.982393	0.796975	0.934688	0.935599	1.4343	1.20901	0.940056	1.13602	1.31661	0.994554	1.31111	1.22911	0.879169	0.789598	0.804727	1.35799	1.08478	0.925396	0.845151	1.41328	1.84937	1.05653	1.00844	0.943082	0.797863	0.897514	1.06773	0.67182	0.81888	2.14122	1.05174	0.686053	1.3042	0.988703	1.1923	0.852465	0.594327	0.651367	0.955234	0.966716	0.847113	0.940191	0.697104	0.873703	0.785586	0.739989	1.34907	1.15936	1.57556
3702.59	1.43875	1.07343	1.27646	1.43839	1.11713	1.64068	1.24807	1.102	1.56466	1.05217	1.37973	1.0473	1.70614	1.06217	1.05326	0.964197	0.914264	1.56206	0.855411	1.4265	1.20605	1.32997	1.56276	0.86964	1.03617	1.0904	1.16549	0.869271	1.3767	1.99573	1.08358	0.998914	1.32538	1.21696	1.22535	1.28405	0.526765	0.756927	1.30978	1.15946	1.04493	0.862586	1.0339	1.11856	1.22164	1.11873	1.30375	1.13258	1.36746
3711.56	1.07717	0.882828	0.829879	0.790051	0.918229	1.15022	0.807966	0.80362	1.30555	0.980679	1.52771	0.805936	1.3099	1.33198	1.00052	0.971938	1.10715	1.19982	0.966603	1.21548	1.33251	1.34059	1.15548	1.41394	0.896872	1.18681	0.627727	1.09145	1.16792	1.23835	1.0061	1.04192	1.66688	1.20434	1.39484	1.23015	0.575321	0.956735	1.47486	1.31666	1.51884	1.32946	1.02131	0.91289	1.19959	0.850888	1.46009	1.30419	1.35888
3720.33	1.75245	0.848652	0.812248	1.05688	1.14301	1.37575	0.941094	0.774635	1.33202	0.922863	1.12834	0.869434	1.22101	0.885869	1.03607	0.985908	1.31348	1.27686	1.27454	0.869498	1.00782	1.14586	0.960069	0.758318	0.594636	0.819658	0.610987	1.0758	0.92399	2.00903	0.87712	0.846338	1.13611	0.974291	1.1434	1.21169	0.673946	0.820832	1.07797	0.755435	0.510314	0.94734	0.818802	1.33703	1.21441	1.0474	0.849945	1.09605	1.21986
3723	1.52578	0.888563	0.64612	1.86361	1.20463	2.06782	0.952154	0.860393	1.05006	0.734259	1.7336	0.881393	1.24619	1.54469	0.84294	0.745149	1.29271	1.62702	1.06209	1.41593	1.01246	1.61179	1.96809	0.565898	1.21503	0.6565	0.58462	1.45897	1.15154	1.98276	1.58435	1.26286	1.49282	1.00789	1.87617	1.41191	0.947116	0.855166	1.40994	0.996553	1.29372	1.16343	1.29283	1.01444	1.12217	0.85888	0.688122	1.39492	1.61262
3727.55	1.12916	1.03265	0.995771	1.09901	1.28182	1.28566	1.32486	0.931194	0.949415	1.53805	1.20196	1.03199	1.8178	1.13512	0.900975	0.889875	0.995271	1.42272	0.966051	1.49221	1.20522	1.47677	1.13067	1.07322	0.832382	1.26145	1.24546	0.984457	1.52181	1.64462	0.893853	1.08082	1.27684	1.19963	1.2526	1.07413	0.874756	0.61892	1.36201	1.16783	1.07496	1.17791	1.01012	1.40947	0.993434	0.789622	1.40384	1.62419	0.920293
3733.62	1.23686	0.648014	0.927299	1.10352	1.20021	1.47131	0.871111	1.21106	0.835127	0.998376	0.932373	1.06467	1.63255	1.05402	0.656771	1.11877	1.60557	1.13916	0.571607	0.827555	1.58296	1.84092	1.31828	1.00402	0.798742	1.31514	0.708726	0.690985	1.29237	1.96262	0.820469	0.958895	1.63105	0.769537	1.80032	1.32548	0.375231	0.535135	1.07943	0.829516	1.01091	0.957674	0.950686	1.40261	1.17129	0.869357	0.987111	1.014	1.08368
3739.59	1.44811	0.923835	0.759945	0.71873	1.29091	1.09584	0.747086	1.23887	1.09066	0.868756	1.15089	0.974295	1.25077	0.834302	1.19428	1.30221	1.26107	0.894738	0.983083	0.89964	0.759546	1.51513	1.37746	0.728669	0.986883	0.746706	0.676843	0.78612	0.663023	1.72152	1.2852	0.719769	1.16134	0.900052	1.32071	1.02679	0.603572	0.771477	1.00062	1.06621	1.51781	1.15697	1.01483	1.08739	1.07027	0.829685	0.604464	0.923741	1.32042
3742.72	1.23288	0.927982	1.19568	0.93946	1.07425	1.19011	1.01378	0.887774	1.15144	0.985808	0.854676	1.02538	1.66759	0.916678	0.621175	0.890821	1.11607	0.985464	0.748237	1.00003	0.865095	0.914328	0.918855	0.758406	0.599456	1.17532	1.06936	0.945651	0.868579	1.55911	0.76756	0.975962	1.16631	1.30203	1.23069	0.878017	0.400351	0.778433	0.978382	1.41771	0.82735	1.16102	0.713837	0.814921	1.31025	0.688842	0.704234	0.90164	1.29949
3751.64	1.24396	0.757485	1.17814	1.19973	1.50036	1.38654	0.868757	1.05747	1.4936	1.07693	1.58122	1.23603	1.45114	1.21308	0.689406	1.10285	1.18983	1.08969	1.04515	1.11554	1.46234	1.75195	1.93848	1.59958	1.13774	1.06972	0.810499	1.29508	1.21096	1.72638	1.349	0.798547	2.10242	1.2468	1.68639	1.68247	1.00768	0.657909	1.21627	1.56393	1.3841	1.26662	1.13461	1.22095	1.14778	0.73696	0.888531	1.32459	1.64212
3757.77	1.57335	1.03619	0.91357	1.07246	1.74067	2.1016	0.944389	0.986127	1.94007	1.64924	1.32941	1.03606	1.69076	1.97306	1.05839	0.905538	1.42347	1.66187	0.782708	1.68515	1.36907	2.11063	1.46344	1.16832	0.917267	1.05527	1.4353	1.23192	1.24277	2.07483	1.13499	0.993342	1.29596	1.24871	1.33891	1.04284	0.564824	0.9577	1.24487	1.12998	1.13471	1.15893	1.39423	1.33196	1.19846	1.32547	1.27178	1.72318	1.34085
3761.39	0.842669	0.709334	0.90133	1.087	1.11917	1.37998	1.02541	0.877521	1.05101	1.03373	1.28793	1.04611	1.45444	0.830763	0.982467	1.18131	0.732037	1.49506	1.05253	0.931807	0.846786	1.19353	0.942607	0.874796	0.978614	0.97688	0.832549	1.08297	0.941181	1.4553	0.89112	0.724267	1.33693	0.860353	1.61707	1.31821	0.462302	0.659698	0.86313	0.783768	0.840368	1.18151	0.816774	0.763653	1.1027	1.07517	1.14863	1.2194	1.2103
3775.52	1.99718	0.724758	1.37838	1.48327	1.54129	2.5808	2.02254	1.78087	2.57796	1.5365	1.77537	0.972389	2.82908	1.55898	1.15174	1.63905	1.61509	2.60035	1.19921	1.73411	1.5629	1.57844	1.64186	1.65103	0.589493	1.2815	1.23183	1.27329	1.22594	2.10424	1.9207	1.35934	1.71117	1.80316	1.48077	1.61731	1.19426	0.866695	1.48877	1.82804	1.85842	1.21703	1.73914	1.60551	1.42565	1.50398	1.79832	2.11663	1.90704
3785.28	0.695801	0.816229	0.663639	0.865573	0.949141	1.13628	0.606482	0.634324	0.939586	0.774993	1.04169	1.27621	1.10683	0.963046	0.510723	1.10927	1.04451	1.18803	0.949627	1.31499	1.00769	1.16876	1.00033	0.964448	0.761361	0.993742	0.78725	0.766027	0.984403	1.51009	0.794348	0.553343	1.07328	1.00583	1.12511	1.0362	0.636707	0.65005	0.982842	0.899818	0.814126	0.688609	0.9039	0.872222	1.19593	0.857336	0.845889	1.01068	1.30486
3791.8	0.965687	0.77669	0.94392	1.22737	0.944282	1.04455	0.942617	0.746663	1.10554	1.3018	1.41627	0.786109	1.23475	0.737812	0.970562	1.0918	0.956294	0.983534	0.658363	0.597879	0.948531	1.71265	1.35338	1.64468	0.808344	1.33096	0.710413	0.553369	1.00029	1.18928	0.597263	0.850092	1.1209	1.07512	1.07025	1.592	0.448815	0.641839	1.33026	0.82809	1.1308	0.668584	0.754557	0.97523	0.932776	0.896041	0.772352	1.2954	0.767968
3795.18	1.12044	0.620814	0.835447	1.30463	1.08506	1.38291	0.938651	0.847565	1.05362	1.08033	1.33991	0.880468	1.51331	1.53941	1.14717	1.31196	1.2875	1.42731	1.12022	1.11852	1.24196	1.53912	0.893374	0.882134	0.561129	1.13683	1.13958	1.25136	0.781984	1.88646	1.22961	0.908767	1.38801	1.02206	1.42096	1.27132	0.704449	0.647744	1.42448	0.946022	1.16506	0.760419	1.01723	1.3639	1.09422	1.00207	1.00922	1.09576	1.17544
3797.31	0.961059	0.87253	1.00031	1.14713	1.44307	1.94327	0.763938	0.816001	1.63329	0.772116	1.40993	1.03302	1.54866	1.17761	1.10574	0.975812	1.18383	1.44549	0.993883	1.02538	1.36568	1.2167	1.41796	0.872136	0.633492	1.05324	1.11264	1.07636	1.10881	1.50195	1.06954	1.0544	1.31602	0.986371	1.35847	1.11631	0.62355	0.568299	1.21865	1.05501	1.11445	0.979528	1.05071	1.52306	1.22346	1.17368	1.04461	1.0567	1.46122
3801.91	1.3475	1.08243	0.955864	1.30562	1.20535	1.35993	0.940823	1.23184	1.77094	1.14721	1.42433	1.29388	1.55776	0.859986	0.981011	1.53953	1.42515	1.15566	0.685336	1.70665	1.02325	1.43874	1.45412	1.08169	0.813709	1.13634	1.14818	0.753552	1.00594	1.8127	0.969028	0.836322	1.78734	0.945979	1.55496	1.13434	0.640038	0.670018	0.828543	1.02001	0.894346	1.15681	1.02011	1.19326	1.08752	0.7567	0.804472	1.18985	1.30707
3807.54	0.768976	0.715714	0.608198	0.571086	1.32574	1.34462	0.607528	0.780959	0.804703	0.883222	0.777235	0.907003	1.13711	1.35483	0.783365	0.465958	0.991582	1.44534	1.00122	1.007	1.19773	1.07923	0.949853	0.514772	0.558443	0.951448	0.803705	1.13581	0.689451	1.44929	0.865437	0.55377	1.15504	1.0609	1.02345	1.04753	0.492084	0.490015	1.14731	0.664144	0.769109	0.682905	1.00352	0.675042	1.0886	0.768427	1.10976	1.20031	0.983135
3817.11	1.31837	0.824522	0.842715	1.17303	1.44661	1.77234	0.9586	0.708893	0.885011	0.894387	1.51671	1.23031	1.31971	0.948326	0.621509	1.08259	1.05649	1.6459	1.06671	0.988286	1.25818	1.89663	1.37006	0.982118	1.26878	0.980814	0.745762	0.922976	1.3286	1.99879	0.774585	1.08635	1.40421	1.44103	1.11245	1.00007	0.554983	0.848298	1.50199	1.43739	0.945184	1.1162	0.824106	1.44855	1.53769	1.03786	1.4394	1.13636	1.3328
3822.48	1.38155	1.12117	1.97962	1.36063	1.70326	1.94421	1.15935	1.5026	2.32341	1.33036	1.98148	1.56967	1.70999	1.67579	0.854943	1.23195	1.20566	1.68307	1.46619	2.02794	1.57941	1.84376	1.68355	1.08485	0.896819	1.54853	1.71749	1.49415	1.44709	1.88383	1.26039	1.02285	2.65396	1.40643	1.91754	1.52442	0.963264	0.870932	1.50013	1.40496	1.581	1.55226	1.47106	1.94176	1.35541	1.38398	1.61077	1.5662	1.91854
3824.94	1.56662	1.33357	1.65183	1.90528	1.70847	1.42766	1.16709	1.87898	2.37761	1.20614	2.15047	1.10093	2.28793	1.62587	1.70192	1.4478	1.77885	1.99523	1.17395	1.52975	1.38169	1.70773	1.47628	1.44023	1.00233	1.685	1.60394	1.86111	2.01065	2.05061	1.18649	1.14118	1.92289	1.12077	1.77736	1.7439	0.830944	1.36529	1.83009	1.13783	1.79849	1.2816	1.40426	1.98781	1.59783	1.30839	1.91485	2.64158	2.34305
3835.29	1.00164	0.481885	0.594878	0.659509	1.64896	0.946985	0.800584	0.783028	0.81261	0.789384	1.10326	1.06058	1.1627	0.557673	0.51963	1.24458	0.829057	1.17635	0.631166	0.843176	0.941883	0.861726	0.740688	0.527846	0.410992	1.03287	0.66039	0.836953	0.886238	1.74318	0.757426	0.467804	0.980037	0.851347	1.05131	1.2026	0.385447	0.62728	1.29885	0.926154	0.839759	0.95145	0.799363	1.0366	1.00137	1.30672	0.429613	1.02308	0.894471
3839.54	0.823619	0.820468	0.780194	1.28899	1.2683	1.40977	1.14065	0.843086	1.13586	0.819567	1.16575	0.782234	1.19927	0.974635	0.799457	1.05389	0.921099	1.69014	0.808404	0.833183	0.966465	1.15268	1.09491	0.886774	0.560695	1.17567	0.743689	0.811551	0.967199	1.5497	1.028	1.11088	1.63849	0.970526	1.71941	1.58165	0.650867	0.624444	1.43316	1.26377	1.09892	0.663903	0.797885	1.21697	1.24374	0.764725	1.00256	1.09597	1.00066
3844.13	1.25459	1.06689	0.878117	1.2061	1.25352	1.49439	1.06995	0.895941	1.28267	0.952758	1.35351	0.960859	1.44236	1.50203	1.29218	1.0531	1.69395	1.31896	1.14494	1.26013	1.49293	1.58377	1.17267	0.96265	0.728405	1.22468	0.945319	1.33814	1.0147	1.83749	0.826923	1.09631	1.34517	1.28718	1.27815	1.06052	0.693006	0.688205	1.2931	1.01162	1.2496	1.14864	0.971639	1.21887	1.01148	1.0622	1.00189	1.09323	1.08841
3858.74	0.847099	1.79056	1.23706	1.16932	1.2102	1.29137	0.821672	1.15151	1.1494	0.931953	1.62741	1.06907	1.42261	1.39351	0.967755	1.11919	1.37018	1.58966	1.28789	1.1486	0.948587	1.80422	1.55451	1.20924	0.895052	1.33911	0.830743	1.13556	0.922345	1.47509	1.24186	1.41225	1.06411	0.992266	1.23486	0.730406	1.08496	0.725165	1.13221	0.836602	1.45255	1.15241	0.923612	1.01161	1.53371	0.845068	0.901666	1.00822	0.87834
3863.19	1.32872	0.917322	0.867873	1.20004	1.33175	1.62364	1.37279	1.07042	1.8221	1.30506	1.12946	1.48773	2.01771	1.80743	1.03032	1.20271	1.28766	1.1829	0.87815	0.838279	1.19815	1.47249	0.974204	1.01655	0.56431	1.30639	1.02458	1.09021	1.113	1.97198	0.794952	1.14734	1.45185	0.923673	1.58643	1.41269	0.700467	1.0765	1.89384	1.291	1.26818	1.04938	0.960387	0.935482	1.29313	1.09162	0.931208	1.48423	1.49929
3877.75	0.934251	0.924796	0.795053	1.10793	0.991843	1.13115	0.872941	0.754687	0.970145	0.60617	1.34249	0.921937	1.1438	0.67935	0.690146	0.731468	0.912771	0.943484	0.457301	0.784598	1.14731	2.01329	1.31221	0.610605	0.678702	0.825868	0.556965	0.740819	0.815784	1.84403	0.63085	0.630225	1.0265	0.977171	1.29796	1.17221	0.668044	0.621208	1.27759	0.860186	1.03301	0.871692	0.835827	0.991309	0.815016	0.892311	0.774259	0.860367	1.28118
3887.14	1.15908	0.923997	1.07364	1.04896	1.68899	1.01277	0.666655	0.65373	1.41618	1.29685	1.54856	0.850348	1.25355	0.886289	0.74023	0.848441	0.777584	1.21387	0.756699	0.99575	1.32816	1.02524	1.0358	0.797378	0.518728	0.877533	0.770604	0.907236	0.785023	1.83691	1.04579	0.728995	1.09986	0.93481	1.34792	1.187	0.778804	0.706444	1.55908	1.09089	0.856989	1.25931	1.02948	1.04798	1.05545	0.868722	0.736887	0.84021	1.12103
3889.75	0.985475	1.16545	0.870964	1.16536	1.24086	1.53611	0.942561	1.20059	1.29042	1.16529	1.25876	1.45501	1.19538	1.25601	0.692201	1.26164	1.69413	1.59048	1.29474	1.01621	1.52301	1.7144	1.32752	0.960403	1.3074	1.17283	0.734196	1.20081	0.884123	1.70074	1.15922	0.659932	1.61108	0.987512	1.15041	0.948466	0.631204	0.770745	1.24174	0.946195	0.842983	0.927835	0.856917	1.17455	1.34839	0.97733	1.00506	1.21431	0.945982
3905.67	1.27014	0.894247	1.10237	1.47702	1.52615	1.6494	0.94114	0.733153	1.49155	0.911348	1.52582	0.984316	1.60278	1.17115	0.649345	0.948858	1.07513	1.55899	0.665717	1.12423	1.30711	1.58171	1.20126	0.744515	0.704831	1.14991	1.56356	1.07072	1.03699	1.48022	1.02161	0.816447	1.38095	0.979231	1.97835	1.5168	0.578826	0.541281	1.35986	1.51689	1.29925	0.889935	0.999226	0.881688	1.24366	0.752881	1.02807	1.37345	0.983217
3908.39	1.23889	0.767852	0.925193	0.93042	1.37195	1.49457	1.30466	1.25938	0.963323	1.30384	1.60412	1.08957	1.27851	1.25612	0.93031	1.03259	1.03824	2.14672	1.03611	1.41024	1.13851	0.919896	1.15737	0.81213	0.769246	0.928218	1.50619	1.01849	1.60833	1.81502	1.32979	1.14472	1.74775	1.0442	1.56945	2.15943	0.438451	0.628539	1.22823	1.34149	1.16044	1.1102	1.21218	1.42953	1.4922	0.752297	1.4815	1.56274	1.77454
3920.13	0.944399	1.2712	1.59668	1.08077	0.776533	1.78154	0.834692	0.905594	1.58092	1.08865	1.40253	0.810663	1.37565	1.48164	0.711738	1.34566	1.40687	1.06782	1.00159	1.13996	1.25816	1.49829	1.09441	1.0936	0.951905	1.20314	0.905547	1.03098	0.828229	1.94213	0.881546	0.839608	1.60566	1.35256	1.35362	0.971626	0.787304	0.597329	1.15559	0.82169	1.178	1.09865	1.10991	1.58421	1.2904	0.886959	1.28692	1.57091	1.18145
3922.21	1.12114	1.1326	1.36125	1.39754	0.906316	1.55001	0.754083	0.927863	1.41201	0.980367	1.45779	0.881736	1.65083	1.75711	0.966138	1.1535	1.99432	1.68241	1.31867	1.43848	1.45562	1.66008	1.02581	0.919316	0.908995	0.922825	1.01745	1.014	1.11708	2.15202	1.48505	0.766022	2.02333	1.02658	1.21273	1.16349	0.726255	0.672351	1.11905	0.927661	1.52009	1.30801	1.14675	1.23933	1.4085	1.0706	1.20561	1.54589	1.99385
3934.05	0.924011	0.81332	0.841786	1.15752	1.1323	1.5429	1.04165	0.800139	0.836363	0.857188	0.894163	0.985235	1.43153	1.1727	0.787107	1.06642	1.45392	1.2789	0.940851	0.934644	0.965643	1.53756	0.92698	0.588009	0.794434	0.797603	0.834568	1.36478	0.879437	1.80648	0.868073	0.965136	1.04755	1.24245	1.59986	1.23256	0.439375	0.771591	0.962549	0.875702	0.899092	0.921803	0.653883	1.49481	1.74182	0.853676	0.810801	1.2376	1.19776
3952.08	1.23375	0.835681	0.912293	1.07912	1.27936	1.44526	0.949413	0.936666	1.12122	0.986479	1.76207	1.29326	1.80505	1.4598	0.801659	1.34118	1.28127	1.87071	0.829201	1.26823	1.21523	1.42995	1.51249	1.26101	0.712693	1.40574	1.10886	0.852326	1.04461	2.03965	0.930863	0.976539	1.3998	1.00144	1.34637	1.15916	0.960323	0.596731	1.19723	0.788299	1.03701	1.16684	1.20706	1.4056	1.26537	1.23464	0.911227	1.15519	1.15185
3954.6	1.63618	1.25046	1.12207	0.914277	1.26622	2.22249	1.36319	1.19279	1.09517	1.38608	1.44832	0.860799	1.36286	1.453	0.896398	1.09643	1.02105	1.56438	1.18617	1.3016	1.34167	1.96056	1.45422	0.851839	1.14503	1.04317	1.26566	1.06788	1.60563	1.67063	1.17752	1.21742	1.40727	1.04739	1.83061	1.30299	0.850856	0.784171	1.37828	1.02529	1.29736	1.09139	1.2759	1.13302	1.5778	1.15386	1.6446	1.59034	1.85599
3961.34	0.996894	0.575802	1.09087	1.28608	1.25027	1.24999	0.791878	1.07163	0.811704	0.916517	1.4564	0.728961	1.11862	0.73727	0.99695	0.614734	1.08255	1.29136	0.859455	1.05681	1.56933	1.15657	1.37493	0.957582	0.690742	0.8415	0.702017	1.0116	0.85209	1.63203	0.890077	0.995405	1.13474	0.850722	1.38383	0.998965	0.31813	0.89641	0.758739	0.655014	0.687635	0.733597	0.87344	1.06743	1.02066	0.839893	1.04748	0.999706	1.06016
3975.34	0.976415	0.806872	0.958411	1.11103	0.990175	1.51613	1.33666	0.797872	1.33473	1.01711	1.21995	1.00304	1.29977	0.733379	0.923709	1.29814	1.00254	1.44349	0.906386	1.7442	1.18046	1.31657	0.985669	0.773565	0.609864	0.862119	1.13147	1.00914	0.907509	1.86603	0.998179	0.796095	1.54956	0.853537	1.39376	1.11365	0.572131	0.569974	0.984218	1.35813	0.858814	1.09685	0.990026	0.984475	1.11202	1.01283	0.867086	1.06815	0.938824
3986.47	1.11005	1.1802	0.907634	0.940718	0.932531	1.17993	0.966007	0.979042	1.39918	0.874946	0.980387	1.295	1.66418	0.932239	1.13553	0.820223	1.03033	1.12487	1.01362	0.825548	1.11051	1.50167	1.07609	0.726536	0.67645	1.08692	0.896524	1.07293	0.867144	1.43932	0.909909	0.671867	1.09574	0.91915	0.953971	1.1122	0.588643	0.875474	1.21393	0.791821	1.06414	1.1564	0.979804	1.02355	1.2095	0.872419	0.733599	1.12119	1.26711
3989.94	1.14364	1.15618	1.06486	0.952329	1.29223	1.51675	0.680091	1.10382	1.12112	1.73828	1.17408	0.928946	1.39916	0.959262	1.09405	1.17174	0.840282	1.13827	0.975585	0.962072	1.00369	1.39822	1.09668	1.00236	0.929449	1.03747	1.33013	0.955228	0.975297	1.4827	0.703445	0.974582	1.14297	1.32766	1.13355	1.13662	0.609675	1.00101	1.11929	1.14888	0.990539	1.03662	0.939219	1.12019	1.27314	1.20864	1.03282	1.01123	0.954483
4008.36	1.65306	1.5989	1.44426	1.14619	1.44848	1.70955	1.25827	1.55797	1.49488	1.42778	1.78198	1.22348	2.31309	1.48504	1.63835	1.4662	1.22267	2.35946	1.34926	1.55454	1.51548	1.84027	1.40602	1.04057	0.909287	1.37968	1.52777	1.55434	1.50977	1.95944	0.99206	1.30516	1.90585	1.32861	2.12894	1.5475	1.2374	1.05922	1.98542	1.30099	1.45131	1.33286	1.39516	1.71819	1.63466	1.30677	1.3611	1.7729	1.76975
4018.33	1.01682	0.802718	1.23054	0.696469	1.24817	1.59713	0.784875	0.558007	1.36925	0.950718	0.977891	1.13653	1.44685	1.22806	0.688666	0.894086	1.36195	1.20226	1.04343	1.20435	1.25318	1.54135	1.26324	1.16348	0.682857	1.0666	1.12194	0.728652	1.20666	1.97547	0.876316	0.886607	1.3782	1.03217	1.41067	1.02813	0.553469	0.620328	1.44894	0.691723	1.02142	0.970957	1.09751	1.1765	1.17376	0.992832	1.32395	1.77921	0.928677
4030.16	1.30203	0.914855	0.573193	0.950529	0.908586	1.44574	0.862639	0.955015	1.11842	0.896707	1.21004	0.725611	1.15379	0.691534	0.712535	1.0635	1.04242	1.23305	0.693244	0.745297	1.04808	0.718228	0.949446	1.18895	0.572734	1.12939	0.680315	1.1166	0.80439	2.03747	0.73782	0.606435	1.09368	0.833504	1.22899	1.27473	0.606581	0.53206	0.906525	1.11568	0.857019	0.917249	0.811195	0.9215	1.32914	0.900518	1.16174	1.14731	1.08173
4042.32	0.969701	0.718799	1.0467	0.76632	0.926612	0.726541	1.07463	0.490341	1.03048	0.948398	1.14851	0.914481	0.920541	0.665936	0.623942	0.999533	0.740579	0.890618	0.741151	0.845622	1.20399	1.17734	0.889658	0.664832	0.668682	1.07929	0.789673	0.825166	0.669536	1.46961	0.898366	0.964305	1.10677	0.972284	1.31663	1.16218	0.494273	0.686379	0.842543	0.669643	0.644065	0.768266	0.940539	0.999184	0.955084	0.760883	0.951735	1.07576	0.699978
4047.98	1.06875	0.911883	0.755096	1.11829	1.50758	1.4019	1.10574	1.14184	1.10016	0.925441	1.17795	0.777459	1.75812	0.749987	0.610104	0.635999	1.37012	1.41023	0.837373	0.762616	0.915231	1.29321	0.993772	0.771454	0.687584	0.931813	1.02814	1.11489	1.02618	2.09764	0.82099	0.778601	1.11067	0.992647	1.07848	1.20587	0.476184	0.733561	1.05117	0.988122	0.990976	0.911587	0.946365	0.906132	1.0421	1.09618	0.753165	1.25546	1.28463
4051.9	1.00372	0.885162	0.659677	1.18995	1.30049	1.41921	1.0284	1.13921	1.16466	1.14772	1.25887	1.21663	1.61879	1.26136	0.818687	0.974967	0.948234	1.71546	1.0374	0.858068	1.0607	1.29026	1.20946	0.909679	0.761755	1.06373	0.947569	0.832147	1.2517	1.40235	1.10659	0.9843	1.45708	1.2231	1.53888	1.29478	0.586955	1.0401	1.06717	1.14875	1.13273	1.11391	0.818029	1.34672	1.10774	1.09593	1.17334	1.29924	1.02203
4054.4	1.0868	0.859613	1.04472	1.47852	0.970725	1.30367	0.859947	0.971291	0.984167	1.06071	1.47437	1.2932	1.22407	1.43764	1.03081	1.36025	1.04477	1.38181	0.920137	1.15038	1.17638	1.33096	1.16187	0.863383	1.09946	1.15015	1.19219	0.739592	0.987276	1.13319	0.928589	1.11184	2.08493	0.991777	2.09944	1.42916	0.56616	0.995568	1.28487	1.08423	0.891148	1.12417	0.784486	1.33423	1.60062	0.872333	1.0503	1.1648	1.37416
4069.69	0.795965	1.02838	0.736092	0.94765	1.02151	1.10246	0.80943	0.779965	0.717947	0.984282	1.16077	0.918674	1.23551	0.768214	0.864564	0.981425	1.5077	1.13706	0.583927	0.77414	0.737159	1.37055	1.2726	0.842644	0.680281	0.863569	0.512855	0.872878	0.984329	1.33146	0.92071	0.742179	1.01543	1.03038	1.22513	0.821388	0.535573	0.772563	1.09379	0.909807	1.03746	0.90347	0.960532	0.718412	1.34045	0.835631	0.819438	1.1406	0.690472
4088.31	1.04738	0.899027	0.936702	1.07792	1.0427	1.19863	0.581303	0.861871	0.952051	0.608814	1.38302	0.87749	1.20772	0.961159	1.02705	0.689636	0.789245	1.36255	1.28792	0.822241	0.926129	1.06863	1.09169	0.914991	0.689188	0.665574	0.740597	0.845812	0.836141	2.14021	0.939976	0.748507	2.33606	1.03164	1.25496	1.13873	0.421606	0.656872	0.975825	0.898254	1.04159	0.701392	1.02312	0.779322	1.10684	1.21584	0.990069	1.01963	1.2351
4094.71	1.31885	0.967898	1.12061	1.1861	1.30704	1.76433	1.34492	1.04222	1.14929	1.19411	1.41719	0.795399	1.68414	1.09678	1.15253	1.43159	1.43431	1.61333	1.00944	1.11466	1.57456	1.97317	1.37633	0.906798	0.693623	1.34779	1.65968	1.39933	1.5551	1.97901	1.22493	1.02289	1.52498	0.843124	1.55187	1.24202	0.998742	0.547107	1.38192	1.46875	1.07233	0.980469	1.44538	1.59563	1.18799	0.90119	1.02632	1.06997	1.41388
4096.65	1.62361	0.887319	1.32543	1.29389	1.47544	1.68135	1.67645	1.14952	1.46874	1.59697	1.35613	0.97583	1.79335	1.27519	1.10236	1.45807	1.22836	1.72259	1.25099	1.6731	1.47082	1.43966	1.44845	0.98805	0.862595	1.1634	1.29672	1.10237	1.32841	2.20706	1.26293	1.1092	1.67778	1.21116	2.01174	1.15164	1.27698	0.738197	1.45013	1.26045	1.21794	1.14633	1.32194	1.5521	1.32168	0.874635	1.07244	1.73005	1.46985
4113.54	0.854477	0.971233	0.866023	0.950455	0.88377	1.1518	1.03734	1.13932	0.748001	1.23154	0.857721	1.09069	1.13916	0.90732	0.865143	1.13165	1.09726	1.62518	1.44266	0.891691	1.04272	1.89697	1.07836	0.880762	0.664554	1.08712	0.932121	0.785913	0.835305	1.29098	0.999117	0.630628	0.952311	1.11726	0.891563	0.940282	0.59957	0.615825	1.14843	1.13614	1.10107	0.989711	1.06206	0.850611	1.16397	1.07839	1.09633	0.789109	1.55631
4121.36	1.05683	0.980378	1.21893	0.977907	1.24384	1.10009	1.06973	1.02358	1.09698	1.00629	1.83833	0.949789	1.83014	1.16903	0.937631	0.838217	0.843258	1.46347	1.53401	0.95738	0.86833	0.989136	1.46731	1.02551	0.819945	1.46222	1.3433	0.936124	1.046	1.29957	0.89407	1.10435	1.59145	1.14317	1.02377	0.917521	0.860062	0.701784	0.850093	0.852073	1.11454	1.1034	1.10369	1.3977	1.02022	0.898938	1.07085	1.57229	1.28003
4133.2	1.25481	0.561759	0.961103	0.791813	1.052	1.29398	0.809172	0.623445	0.651633	0.492698	0.497093	0.874525	1.0101	0.867074	0.577543	0.965276	0.784771	0.958484	0.359157	0.991647	1.05167	1.22942	1.1096	1.28152	0.513901	0.758706	0.635105	1.02938	1.01271	1.07219	1.00801	0.741242	1.25267	1.05137	1.22794	0.808944	0.473672	0.48393	0.595558	0.931572	0.718731	0.625518	0.684298	0.792797	1.01686	0.816279	0.878294	1.15179	1.06907
4150.81	8.86852	8.9574	4.88023	0.462339	4.44622	10.1811	18.7817	5.37191	5.31971	11.322	23.8798	7.17634	12.0371	0.768812	3.21459	9.04469	17.2354	34.593	11.6253	11.5981	3.55799	9.03329	9.88726	3.06697	16.1105	12.7526	0.568133	9.40615	15.7264	22.6127	15.1066	19.6337	13.3962	4.43578	26.7432	15.2387	0.361316	13.0805	18.9585	10.0471	12.2345	23.9809	38.0903	11.685	24.2098	22.3852	0.880612	29.6333	29.5808
4153.14	12.7124	12.4873	6.16734	0.577206	5.4587	18.7164	25.6028	7.58616	9.65181	17.1755	30.3469	7.49756	16.4515	1.06898	4.91888	10.5382	26.2389	47.8293	15.3036	17.608	4.85787	11.885	15.0356	3.6717	24.6736	14.2335	0.696131	13.7786	25.7737	28.4423	21.9546	34.2452	20.1732	5.38835	42.6129	17.5908	0.470583	19.6192	23.3308	12.4763	16.7506	34.9058	52.5393	16.5505	33.1665	37.5408	0.78093	48.3819	40.8157
4173.41	2.12116	2.0575	0.600496	0.23553	0.768551	2.72062	3.31848	0.47582	0.797002	2.01006	3.56429	1.88104	2.64085	0.321305	0.50401	1.61539	2.88865	7.75602	1.82854	1.70766	0.887216	0.522194	2.39601	0.549537	2.89046	1.93751	0.326066	0.495785	2.49086	3.39759	2.61902	3.75564	2.81528	0.570798	6.76782	2.78525	0.0715978	1.55909	2.96514	1.7588	2.13815	3.85298	5.37326	0.316577	4.3269	3.75969	0.187884	5.23717	3.71648
4184.79	0.506838	0.471921	7.09401	20.2679	6.36824	0.944521	0.428052	8.78365	10.2015	0.412132	0.821139	0.535974	1.00912	30.7231	6.84974	0.607925	0.632612	0.51475	0.411375	0.583031	5.39582	11.693	0.867003	4.21467	0.429762	0.511458	29.0503	18.1729	0.464393	0.690842	0.58721	0.442113	0.819469	5.99565	0.546165	0.661564	11.1972	0.505101	0.688611	0.586384	0.815977	0.415195	0.318756	18.1288	0.66329	0.481212	28.8786	0.511247	0.578424
4195.06	1.40245	0.739725	0.286469	0.238711	0.373592	1.66183	1.64131	0.276817	0.541467	1.57151	1.63879	1.50502	1.44433	0.620484	0.32877	1.14621	1.43523	3.22313	1.03635	1.40765	0.407613	0.490389	1.22025	0.29723	1.18657	1.10022	0.396244	0.277247	1.89843	3.15674	1.2977	1.86065	2.21068	0.532869	3.71056	1.52758	0.098366	0.961159	1.99801	1.16288	1.25813	1.85298	2.76222	0.446354	1.72335	1.6648	0.341921	2.85848	2.21257
4215.37	1.24444	0.838315	0.550628	0.324482	1.03996	1.31467	0.826245	0.665515	0.545603	0.65741	1.44329	1.06332	1.23767	1.01367	0.668559	0.985891	1.18526	2.08677	0.659604	1.13843	0.692259	1.05631	1.0571	0.549246	0.670385	1.27589	0.494062	0.454404	0.886197	1.97513	0.98618	1.01236	1.2569	0.689863	1.57061	1.46751	0.291307	0.74153	1.22925	1.20865	0.81382	1.46622	1.35784	0.621122	1.38772	1.13742	0.686201	1.31335	1.49396
4218.08	1.08962	0.956043	0.578195	0.475374	0.696305	1.58516	1.02096	0.684238	0.673868	0.931105	1.44547	0.745762	1.74511	0.358023	0.486164	0.742642	1.36232	2.8643	0.79117	1.14645	0.840661	0.876811	1.14356	0.497233	1.25519	0.936592	0.311798	0.433418	0.938872	1.83425	1.03733	1.08789	1.16636	0.681632	2.39688	1.2133	0.289684	0.638028	1.69424	1.07464	1.21503	1.77594	1.7752	0.715151	1.18025	1.60391	0.362469	2.43901	1.70957
4238.93	1.07433	0.766146	0.557113	0.649755	0.859691	1.29164	0.978451	0.622906	0.867349	1.40942	1.92486	1.25287	1.59704	0.594724	0.817057	0.917155	1.17984	2.32686	0.841888	1.41367	0.706969	1.18305	1.06672	0.645744	0.832004	1.19179	0.39886	0.618101	0.99015	1.83698	0.904705	0.82087	1.49615	0.854001	1.87614	1.00951	0.447453	0.605799	1.15134	1.02165	1.1093	1.38468	1.6988	0.982649	1.42441	1.06991	0.671572	1.58853	1.44214
4261.91	1.15663	0.774448	0.570685	0.621534	0.848278	1.7684	1.13936	0.725749	0.958248	0.976857	1.26397	1.21723	1.08931	0.408063	0.497749	0.842396	0.956777	1.96345	0.780191	1.1437	0.796803	1.1259	1.13401	0.707903	0.772008	1.08228	0.68114	0.723959	1.21879	1.55003	1.08235	0.880603	1.14937	0.981806	1.45635	0.832717	0.428954	0.732794	1.2908	0.950909	0.944336	1.22747	1.61858	0.694721	1.12364	1.15572	0.566849	1.29525	1.22966
4282.89	1.51548	0.745266	0.819225	0.730303	1.1406	1.51381	1.042	0.756783	0.906009	0.988668	1.95794	1.17044	1.37627	0.772915	1.29437	1.14288	1.40207	1.54283	1.10533	1.1487	1.07503	1.31403	1.43357	0.87119	1.25596	0.954203	0.749396	0.759724	1.099	1.49625	0.813249	1.00658	1.33135	0.930692	1.24393	1.80516	0.3987	0.855541	1.21803	1.26527	0.959587	1.10093	1.21212	1.09361	1.21681	1.00432	0.803039	1.59307	1.35488
4285.85	1.38022	1.09858	1.30023	1.49315	1.28404	1.78164	1.12501	1.35965	1.24521	1.4028	1.76731	1.20474	1.50103	0.808484	1.17136	1.49365	1.72714	1.97379	0.932107	1.31122	1.33963	1.54068	1.52142	0.634442	1.03216	1.00743	0.884461	1.06537	1.34489	1.66589	1.2925	1.50864	1.61237	1.09015	1.67747	1.51248	0.50118	0.683139	1.21595	0.977071	1.16037	1.28853	1.18664	1.47958	1.35626	1.36431	1.09422	1.79856	1.5856
4290.4	1.06481	0.94694	1.32308	1.29887	1.11836	1.82009	0.908878	0.9917	1.32074	1.09878	1.53999	1.03557	1.85056	1.50112	1.20655	1.21874	1.16748	1.66038	1.30942	1.21089	1.17242	1.33638	1.50689	1.13958	0.845304	0.974987	1.14195	1.36384	1.10793	1.92558	0.932672	1.08226	1.69856	1.02356	1.497	1.56306	0.929906	0.962923	1.06913	1.23927	1.01665	0.961891	1.09666	1.72367	1.1789	1.42311	1.4528	1.52225	1.40367
4313.53	0.845288	0.805214	0.767255	0.917956	0.970235	1.11856	0.717028	0.511517	0.940255	0.89398	1.02406	1.07708	1.0313	1.36426	1.04797	0.79615	0.697685	1.16318	0.662264	0.980831	0.957356	1.29004	0.978598	0.692282	0.432014	0.775779	0.710457	0.86484	0.68823	1.26253	0.904114	0.549058	1.10072	0.986212	1.01932	0.879099	0.482288	0.681867	0.670093	0.809753	0.761095	0.861317	0.735803	0.976494	0.846154	0.83083	1.17098	1.08424	1.1666
4317.86	1.0575	0.674824	0.806505	0.892914	1.10165	0.818565	0.9121	1.04616	1.25642	1.11372	1.17291	0.953139	1.08611	0.910326	0.77349	0.749383	0.844063	1.01081	0.77287	0.931967	1.17036	1.75563	1.16248	0.684207	0.761006	1.11761	0.534143	1.04008	0.83929	1.50572	0.721709	0.776388	1.11162	0.866444	1.11103	0.951491	0.425084	0.706358	1.11324	1.24197	0.827643	0.896245	0.911892	0.911082	0.946331	0.700031	0.863958	0.879602	1.21474
4337.94	1.77606	1.31204	1.86111	1.70407	1.73316	1.55455	2.14914	2.20504	2.1225	1.64465	2.17655	1.98049	2.1945	2.20511	1.53527	1.82965	1.61912	1.92277	1.64397	1.98813	1.49085	2.014	2.19465	1.51831	1.28855	1.36547	1.59243	1.86664	1.76995	1.80839	1.53583	1.49617	1.52522	1.52861	2.09693	1.97686	1.48884	1.31364	1.88701	1.43944	1.25633	1.44563	1.48903	1.92943	1.58745	1.43402	1.65976	1.62125	2.26527
4339.88	2.37402	1.39167	1.74889	1.82972	1.69624	2.49172	2.46685	2.68372	2.11944	1.85913	1.7635	2.01336	2.44929	2.20424	2.18377	2.13241	2.05242	2.34815	1.74485	2.73234	1.3902	2.38681	2.39906	1.7334	1.45921	1.64414	2.04539	2.08839	2.49901	1.97714	2.18329	1.91638	1.69519	1.3269	1.98737	1.88013	1.25344	1.71397	2.0787	1.79435	1.54049	1.66266	1.72758	2.18986	1.76207	1.93906	2.3218	2.60091	2.20692
4359.08	1.1629	1.04274	0.700399	1.17164	1.14165	1.64054	1.5538	1.23922	1.51395	1.06269	1.24048	0.989603	1.74903	0.731576	0.68788	1.11867	1.92145	2.02093	1.20473	1.99249	1.05074	1.3893	1.58867	0.610175	1.15442	0.876888	0.662102	1.3859	1.63588	1.78183	1.7069	1.23691	1.39381	1.12852	2.17756	1.60156	0.48166	0.859498	1.68066	1.0214	1.53534	1.33696	1.92042	1.43414	1.65947	1.41219	0.788031	2.30687	1.66828
4379.96	1.10936	1.92885	1.03287	1.29797	1.46696	1.51343	1.45951	2.16169	1.4337	1.97576	1.35009	1.23561	2.09417	1.10942	1.95438	1.39281	2.39035	1.74836	1.45891	1.80056	1.37872	1.91713	1.97894	1.65214	1.94056	1.60075	1.57586	1.73045	1.38178	1.68345	1.32437	1.08856	1.22411	1.41723	1.3008	0.868589	1.82482	2.17945	1.40015	1.48282	1.8158	1.61782	1.80873	1.20192	1.66261	1.63547	1.74593	1.64996	1.72574
4402.23	1.96213	1.91561	1.58728	1.70974	1.54298	1.80007	2.54017	2.25719	1.46538	1.24693	1.7291	1.42551	1.43075	0.973857	1.73336	1.34483	1.57509	1.68652	1.40073	1.1574	1.72198	1.49961	1.41931	1.13037	1.82978	1.33521	1.36844	1.31854	1.46345	2.25125	2.07858	1.70718	1.94436	1.62054	1.85466	1.42223	1.47048	1.55909	1.2948	1.64696	2.04065	1.53604	1.42857	1.82915	1.61802	1.83732	1.81917	2.08316	2.13524
4414.29	0.955745	0.492906	0.601672	0.777594	0.808271	1.18916	0.411159	0.568463	0.916184	0.659565	1.21961	0.984781	0.964138	0.872651	0.549251	0.815519	1.08741	0.932516	0.776588	0.881683	1.07158	1.23148	0.990255	0.737398	0.519502	0.962271	0.611926	1.07303	0.762537	1.03333	0.848651	0.568589	1.20948	1.18209	0.890777	0.800111	0.515195	0.513482	0.907457	0.799603	0.511291	0.886448	0.932359	0.72167	0.791943	0.821819	0.987565	0.887976	0.99548
4431.38	0.868896	0.679388	0.627597	0.536122	0.858927	0.917314	0.840681	0.706636	0.650604	0.528952	0.845305	0.833991	1.10738	0.796605	0.558261	0.716731	0.720485	0.825249	0.553243	0.760657	0.845965	1.09788	0.841179	0.846481	0.611511	0.599711	0.550509	0.703538	0.769703	1.37404	0.511063	0.582441	0.947269	0.873015	0.756072	0.778198	0.34436	0.518206	0.842266	0.563111	0.601402	0.59823	0.461463	0.839927	0.834505	0.730092	0.635351	0.826262	1.03288
4454.83	4.57171	6.62458	3.75692	2.64457	4.44627	2.46048	4.85825	6.71655	3.98503	5.35559	1.71957	3.32317	4.1223	3.23362	8.18327	4.29548	4.63608	1.72292	3.38954	3.44308	2.75141	1.90727	3.34821	3.89167	6.04574	4.36346	4.88907	4.11442	4.41796	2.08334	3.74312	5.96883	1.97983	2.60272	3.6794	2.54375	7.5015	4.29177	2.51501	4.32609	5.99664	2.77506	3.22605	3.38878	4.22895	4.69777	3.27943	2.6533	2.67082
4466.76	0.786013	0.990078	0.900106	1.5458	1.36543	1.35895	1.00426	1.22763	1.43042	1.18334	1.08903	1.04845	1.64487	1.1747	1.36913	1.32927	1.01769	1.29173	1.22561	1.02172	1.35998	1.47279	1.02771	0.959641	1.13874	0.994932	1.38829	0.937562	1.17143	1.41281	0.738628	1.04278	1.68424	1.14198	1.01535	1.11247	0.719529	0.733969	1.10141	1.12697	0.793234	1.29195	1.05267	1.29498	1.02692	1.14022	1.03543	1.9494	1.22932
4486.17	0.573723	0.804931	0.538918	1.07319	0.892318	0.892216	0.60912	0.622259	0.961097	0.695716	1.09693	0.817443	0.851438	0.345034	0.516121	0.855418	0.869202	0.814604	0.576517	0.574691	0.850784	1.03896	0.618408	0.961956	0.35072	0.850015	0.488448	0.656753	0.552658	0.948983	0.524133	0.489376	0.896807	0.668505	0.718001	0.775447	0.3671	0.438492	1.10133	0.572421	0.721605	0.590601	0.667924	0.776039	0.709998	0.816345	0.740505	0.878051	0.604295
4489.2	0.701841	0.733522	0.727418	0.977037	1.14515	0.867413	0.712163	0.816121	0.700708	0.939269	0.912917	1.10998	1.31449	0.770709	0.923819	0.696697	0.986847	0.895583	0.859252	0.865928	0.701403	1.13968	0.887401	0.513068	0.43381	0.982301	0.593081	0.776725	0.881831	0.940431	0.884556	0.759449	1.20987	0.970507	1.08145	0.863886	0.565902	0.457662	0.645878	0.589136	0.927578	0.959352	0.930569	1.0304	0.934409	0.536247	1.12065	1.50547	1.05699
4522.93	0.892481	0.753123	0.961231	0.718526	1.16422	1.45185	0.798968	0.86126	1.09989	0.924093	1.26533	0.830317	1.15309	0.950955	0.732511	1.27726	0.949264	0.983734	0.558107	1.0845	0.949067	1.25162	0.982776	0.640204	0.783361	0.799578	1.16435	1.11335	0.841731	1.97413	0.761123	0.950722	1.38128	1.10332	1.19707	1.06587	0.58792	0.801123	0.904231	0.82612	1.01316	0.629963	0.941195	1.08315	1.12945	0.92961	1.23556	1.03544	0.81645
4545.94	0.952291	0.774342	0.731355	0.687918	0.898711	1.17093	0.62715	0.848441	0.982359	0.822896	0.939144	0.81779	1.38327	0.844579	0.597406	1.10444	0.946759	1.47027	0.606945	0.928041	0.771778	1.21987	0.87284	0.893987	0.569962	0.70882	0.536419	1.07436	1.289	1.51625	1.05651	0.988766	1.09168	0.972209	1.04319	0.910928	0.423392	0.699163	1.02405	1.02754	0.854322	0.853355	0.678361	0.833695	1.03889	0.799889	0.721811	0.959836	1.0748
4565.55	1.14745	1.81441	0.978399	1.41841	1.31445	1.53424	1.77729	1.61767	1.02706	1.0943	1.22196	1.78728	1.29172	0.952093	1.57907	1.374	1.14433	1.49834	1.20611	1.69775	1.06422	1.18371	1.44447	1.50593	1.11682	1.38717	0.970297	1.57207	1.06251	1.60405	1.11827	1.20699	1.21714	1.2656	0.982137	1.58141	1.23825	1.53595	1.21001	1.1694	1.28012	1.35747	1.05679	1.01256	1.4024	0.901818	0.954763	1.18737	0.914902
4567.8	1.56399	1.7232	1.25687	1.51808	0.982538	2.10629	1.71333	1.76342	1.28533	1.58514	1.83825	1.79712	1.35641	1.05829	1.45107	0.949492	1.39187	1.96667	1.3069	1.66426	1.33798	1.25251	1.69064	1.20144	1.08267	1.15796	1.28162	1.89029	1.01513	1.77005	1.44101	1.02714	1.3201	1.15323	1.40559	1.65076	1.30138	1.48304	1.38282	1.39395	1.3101	1.42924	1.14536	1.42648	1.2579	1.10844	0.982734	1.26301	1.29919
4584.36	0.924299	0.846381	0.676358	0.810037	0.807433	1.23239	0.595521	0.783784	0.701738	0.789493	0.956827	0.748607	0.968178	0.583275	0.692659	0.967892	0.992483	0.909431	0.586494	0.735475	1.2092	0.975385	0.744778	0.904711	0.586117	1.04524	0.861529	0.650669	0.597818	1.18691	0.873481	0.615032	1.00846	0.909204	0.856327	1.23841	0.664174	0.896654	1.05708	0.863974	0.806943	0.815452	0.734082	0.859715	0.9674	0.684764	0.848202	0.92146	0.929259
4593.81	0.981356	0.7299	0.743577	0.938211	0.993102	1.14185	1.04292	1.2806	0.903253	0.883883	1.11456	0.626925	1.54465	1.07801	0.936345	0.811515	1.16247	1.39849	0.886337	1.09639	1.06227	1.17724	1.13645	0.600082	0.766219	0.982434	0.888857	1.17503	1.08111	1.35639	0.987411	0.912408	1.44093	1.02606	1.06278	1.17699	0.643202	0.779519	1.18893	1.08654	0.997723	1.25224	1.16936	1.20945	0.991955	0.822885	0.926459	1.42247	1.31583
4596.31	1.08916	0.646058	0.982594	1.12285	1.1034	1.28013	1.07666	0.970669	1.02873	0.929302	1.17804	0.627111	1.45497	0.95942	0.984422	0.936666	1.5205	1.55239	0.945209	1.51962	1.36075	1.18478	1.0828	1.05638	0.884209	0.953468	1.08299	1.07422	1.11182	1.16192	1.48989	0.817015	1.18715	0.940141	1.39713	0.995626	0.615895	0.801036	0.965316	1.24276	0.922277	1.4184	1.33753	1.05776	1.15288	1.15267	0.928244	1.99054	1.20522
4621.73	0.775276	0.728003	0.944551	0.7581	1.06666	1.26296	0.863173	0.728564	0.964829	0.76741	0.861925	0.96054	1.07718	0.576221	0.996078	0.83064	1.06996	1.11229	0.743761	0.83861	1.38674	1.4043	1.00476	0.804668	0.719671	0.819309	0.7113	0.811187	1.28601	1.58963	0.764127	0.660927	1.22892	0.871513	0.910103	0.896085	0.369474	0.767949	1.13795	0.976505	0.743927	1.0398	0.79757	0.940688	1.20045	0.820643	1.20983	0.952893	0.925047
4638.56	1.19779	1.09462	1.20192	1.11902	1.49018	1.64299	0.987721	1.51417	1.09298	0.944089	1.33514	0.95069	1.32874	1.17842	1.24105	1.54033	1.63228	1.58269	1.30741	1.51731	1.34377	1.49806	1.2606	1.52391	0.830432	1.21697	1.04803	1.48667	1.41923	1.31077	1.53313	1.28863	1.36449	1.22829	1.42392	1.15708	0.967579	0.970532	1.1382	1.19591	1.26514	1.18999	1.0272	1.04223	1.30275	1.36735	1.4341	1.63255	1.49634
4671.96	0.999437	0.875529	0.822074	0.924056	0.845677	0.945749	0.52746	1.1377	1.01184	0.932481	0.912189	0.95326	0.919445	0.751877	0.873632	0.995962	1.40887	0.945471	0.963464	0.906213	0.873699	0.911177	0.952878	0.756603	0.612628	1.20424	0.906681	0.83283	0.777419	0.897179	1.06311	0.588592	0.915043	0.898427	0.523519	0.94503	0.869645	0.909281	1.12967	0.628346	0.979381	0.829617	0.721287	0.897695	0.848726	0.748103	0.946075	0.80677	1.01683
4683.13	1.0589	1.27612	0.841213	1.23448	1.31211	0.942657	1.21737	1.56109	1.54054	0.974413	1.3737	1.17935	2.12299	1.09828	1.14594	1.20614	1.32032	1.6982	0.860753	0.958066	0.998053	1.25575	1.36752	0.806974	0.988873	1.35186	1.22403	0.95203	0.802439	1.16089	1.32241	1.07195	1.01063	1.05652	1.1373	1.1413	0.974814	0.912852	0.802523	1.10243	1.23995	0.907006	1.14973	1.55151	1.34229	1.26397	1.0347	1.49104	1.43062
4707.32	5.96002	12.7215	5.20662	4.8519	3.86555	4.50414	6.5923	12.2895	5.68722	8.43805	4.04341	6.46457	6.10123	3.53087	11.9386	6.90445	4.9102	6.77886	5.49345	6.83063	3.99307	3.29907	5.08734	5.54065	6.69771	6.69121	7.51807	6.17268	6.02289	2.60861	6.78937	6.55972	3.62017	5.04186	4.45049	3.83682	8.18094	10.5851	3.98149	4.80859	9.65008	5.29342	5.71649	4.19077	5.62403	5.79009	5.87725	4.54518	5.17926
4718.36	0.884461	0.83279	0.665106	0.582809	0.791976	0.899176	0.746155	0.601529	0.829625	0.57534	0.882369	0.654618	1.03257	0.580397	0.687916	0.598013	0.696171	0.949836	0.631734	0.851063	0.828457	1.02809	0.796926	0.528294	0.654088	0.665761	0.474914	0.524469	0.684363	1.00687	0.569448	0.581993	0.97398	0.681606	0.711008	0.591994	0.469417	0.46929	0.593623	0.513988	0.797625	0.671449	0.617319	0.750604	0.821072	0.721953	0.643273	0.934141	0.79402
4729.12	0.726668	0.921632	0.680184	0.900003	1.04146	1.12543	0.974113	0.764652	0.886414	0.625202	1.12429	0.777232	1.41937	0.757353	0.685231	0.688162	0.745439	1.1144	0.503439	0.887617	0.765805	1.05441	0.979091	0.590804	0.349861	0.81123	0.681729	1.06355	0.746612	1.09502	0.873788	0.743231	0.88619	0.677678	0.914937	0.906775	0.440217	0.58158	0.874304	0.7582	0.900353	0.684805	0.62518	0.917142	1.01715	1.15651	0.715072	0.917393	0.849118
4752.29	1.54064	0.745295	0.665395	1.29563	0.90812	1.5885	1.501	1.29745	1.16046	1.06878	0.815702	1.14033	1.66254	1.14437	1.32952	0.767073	1.5785	1.86876	0.985947	1.59481	1.42522	0.967904	1.30909	0.932523	0.803841	0.825792	1.22138	1.01362	0.928816	1.45199	0.899812	0.848703	1.1504	0.901971	1.39431	1.22386	0.688788	0.921787	1.10465	1.30311	0.823736	1.11234	0.888092	1.27566	1.3466	1.5858	1.00967	1.64291	1.39816
4772.63	0.74656	0.404964	0.867007	0.6468	0.801906	0.924898	0.576456	0.613112	0.714776	0.733536	1.87466	0.59221	1.06234	0.817092	0.583326	0.642197	0.828429	0.99208	0.802055	0.873968	0.775922	1.80976	0.816645	0.549999	0.43184	0.872692	0.578234	0.514108	0.805346	1.05838	0.864944	0.63696	1.23648	0.88224	0.800432	0.692951	0.411041	0.509275	0.715754	0.590137	0.799078	0.894481	0.848445	0.997157	0.71448	0.744535	0.635037	0.940635	0.917174
4785.58	1.72241	1.68517	1.37591	1.54789	1.05774	1.21857	1.42079	1.81812	1.39824	1.49152	0.770198	1.42617	1.7362	1.13296	1.87364	1.40851	1.56953	1.82539	1.40051	1.29266	1.06786	2.1137	1.42953	1.48576	0.777107	1.07008	1.51076	1.60654	1.37148	1.99973	1.81933	2.16563	1.33896	1.06243	1.14415	1.26482	1.08198	1.94369	1.3711	1.4744	1.53514	1.38701	1.06867	1.20415	1.91077	2.32131	0.95317	1.085	1.34934
4809.98	0.913672	2.14131	0.812006	1.14379	1.28389	1.10708	0.897921	1.52852	1.29493	1.06822	0.695264	1.35193	1.24285	0.701204	1.28065	1.02038	0.91477	1.54621	1.14343	0.972622	0.997414	1.08106	0.999759	0.76732	0.824551	1.06219	0.811485	0.843258	0.91448	1.04937	1.26727	0.878847	0.893921	0.919153	1.34069	0.955124	0.834924	1.07477	1.18015	0.968383	1.18393	0.954656	0.999461	0.682502	1.16679	0.874637	0.879157	1.2993	1.19539
4820.44	1.6034	1.49321	1.33765	1.06317	1.15796	1.4247	1.30541	1.62216	1.8764	1.39745	1.94177	0.82096	2.02633	1.48837	1.21445	1.01619	1.32713	1.54466	1.18419	1.70293	1.41255	1.38929	1.32796	1.29665	1.04864	1.16162	1.30761	1.42207	1.81024	1.29768	1.37798	1.03156	1.56982	1.1114	1.35142	1.16964	0.998658	1.42223	1.22033	1.12367	1.56979	1.12665	1.13753	1.37978	1.25994	1.37545	1.96727	1.17884	1.25259
4851.91	2.11393	2.54164	3.06922	1.87267	1.71134	1.85417	2.81117	2.67856	1.62887	1.78185	1.75816	1.59876	2.69581	1.77981	2.78767	1.70576	1.602	1.69147	1.41204	1.89277	1.42089	1.72238	2.47022	2.1082	2.56008	2.21697	2.37499	2.65944	2.63085	2.32196	2.3697	2.08434	2.06711	1.30566	2.29025	2.53169	1.99953	3.00399	1.84997	1.6005	2.91652	1.69736	2.5475	2.02903	2.68648	1.93183	1.54644	2.32002	1.38781
4863.88	0.674395	0.707334	0.450067	0.700489	0.658053	0.827847	0.523409	0.641784	0.836196	0.651518	0.787545	0.721871	1.04626	0.779404	0.623358	0.600017	0.572253	0.836404	0.574425	0.785128	0.915108	0.854625	0.886922	0.704944	0.383269	0.584122	0.515777	0.532565	0.644397	0.964496	0.688654	0.494651	0.943719	0.713672	0.958894	0.56852	0.350288	0.412004	0.734484	0.58308	0.66834	0.761705	0.534593	0.606322	0.791037	0.492872	0.702832	0.774728	0.697775
4890.01	0.986663	0.677383	0.850911	0.933585	1.05854	1.13595	0.915183	0.965095	1.445	1.04777	1.74251	0.686989	1.20974	1.33642	0.758273	0.85848	0.972164	1.1181	0.873273	1.12731	0.815251	1.05483	1.1868	0.715576	0.694608	0.943816	1.07123	0.537504	1.00085	1.49791	0.880166	1.04212	1.24369	1.04436	1.1626	1.04148	0.725391	0.99056	0.992005	0.881775	1.11295	0.793368	1.26667	1.20335	1.15207	1.07692	0.818113	1.17967	1.06655
4918.5	0.897291	0.990427	0.652555	0.731425	0.671043	1.3213	0.711578	0.642298	0.759405	0.765067	1.05509	0.752685	1.23629	0.832351	0.755426	0.675997	0.907461	0.886901	0.669791	0.776007	0.881661	0.645611	0.930553	0.668225	0.581656	1.27146	0.607471	1.0845	0.99956	1.16723	0.69815	0.694415	1.12039	0.586652	1.15927	0.865567	0.31748	0.805276	1.00126	0.694668	0.829268	0.815074	0.747866	0.827998	1.09658	0.901219	0.839982	0.848784	0.988707
4933.65	1.34069	0.995262	0.80243	0.824193	1.21004	1.19547	1.25122	1.10198	0.969835	1.03484	1.0739	0.688851	1.69582	1.28421	0.823059	0.798652	1.32541	1.7595	0.887338	1.04026	0.976342	1.1838	1.03487	0.764503	0.685162	0.763573	0.973511	1.02003	1.11397	1.43081	0.81194	0.942326	1.29918	0.739733	1.15301	1.04254	0.611333	0.817459	1.11302	1.30423	1.16892	0.998052	1.28307	1.19846	1.38898	1.195	0.711935	1.26017	1.24968
4956.25	1.37351	1.16934	0.959561	1.14777	0.983755	1.35597	1.3758	1.6714	1.37534	0.961481	1.57661	1.28147	1.42856	0.85119	1.69384	1.31011	1.09925	1.49586	0.89729	1.34112	0.946174	0.96236	1.1289	1.14496	1.18656	0.892979	0.829997	1.33954	1.00253	1.45818	0.928546	1.01204	1.18908	1.12434	1.32253	1.52002	0.944011	1.59763	1.00492	1.22704	1.22623	1.09817	1.06422	0.932341	1.41365	1.34435	0.933613	0.935495	0.820761
5018.24	0.747349	0.900615	0.552985	0.905494	0.810603	0.972448	0.660285	0.605515	0.874283	0.731621	0.907025	0.386649	1.01451	0.790733	0.603079	0.619284	0.958351	1.15228	1.05373	0.649821	1.02395	1.07586	0.841012	0.670119	0.345747	0.804277	0.695097	0.858308	1.18201	1.33317	0.68437	0.745372	0.970943	0.54041	0.863277	1.00815	0.494634	0.428734	0.850221	0.693461	0.758653	0.801884	0.837002	1.05616	0.898158	0.577444	0.522883	0.991468	0.944092
5062.07	1.03924	1.38066	0.967179	1.85193	1.04693	1.75665	1.24106	1.38586	1.43765	1.48614	1.40193	1.06405	1.53752	1.38869	1.3305	1.00659	1.5674	1.75241	1.22911	1.46448	0.991469	1.07499	1.51885	1.04461	1.10324	1.04001	1.20362	1.37024	1.20394	1.34099	1.76826	1.50793	1.32105	1.07897	1.45924	1.02386	0.733188	1.18308	1.37045	1.10472	1.39373	1.17291	1.15228	1.40805	1.41786	0.824372	1.10521	1.30492	1.58034
5104.58	1.49259	1.42228	1.02533	1.35793	0.842129	1.41546	1.31755	1.51647	1.32746	1.53814	1.62667	1.45336	1.80921	1.43126	1.575	1.46747	1.78644	2.12747	1.26611	1.29664	1.6306	1.52658	1.4902	1.14608	1.21745	1.38511	1.29435	1.39994	1.13788	1.48001	1.41895	1.22883	1.60556	1.2702	1.26275	1.26795	1.30875	1.28204	1.07419	0.928166	1.39059	1.32744	1.57526	1.31058	1.5398	1.47142	1.33728	1.53004	0.935891
5190.26	0.812104	1.05879	0.84713	0.855895	0.813445	0.871961	0.852402	1.09328	0.864841	0.760548	1.00626	0.875025	1.02889	0.80983	0.883973	0.983234	0.835252	0.98256	0.743756	0.902662	0.864355	0.7811	0.76671	0.819712	0.637795	0.74341	0.609623	0.899766	0.753628	1.12008	0.909962	0.603183	0.824306	0.934223	0.959846	0.913348	0.807068	0.795469	0.793578	0.849444	0.945595	0.967351	0.781761	1.01288	0.815013	0.668267	0.685869	1.02442	0.831565
5278.47	0.601824	0.833716	0.803205	0.648022	1.13195	0.934222	0.742944	0.80297	0.780482	0.849441	0.971581	0.806066	0.872226	0.802122	0.815455	0.837087	0.869365	0.930842	0.77548	0.70175	0.697123	1.09425	0.850414	0.607314	0.582324	0.881184	0.887319	0.791135	0.696647	1.02384	0.667943	0.651385	0.803735	0.809969	0.804243	0.656057	0.649822	0.702649	0.798823	0.849902	0.934936	0.809944	1.00221	0.774091	0.857621	0.80986	0.519797	0.830167	0.78342
5287.24	1.23207	0.734072	0.799199	0.836075	1.00887	1.4992	1.07482	0.752888	1.0029	1.15119	1.19881	0.871505	1.18942	1.10144	0.861848	0.785589	1.24364	1.03442	1.34286	1.00454	1.05439	1.18971	1.09054	0.737982	0.931962	0.860726	1.09212	0.974544	1.22531	1.20648	1.23286	1.17599	1.25035	1.09228	1.47947	1.39516	0.622801	0.62669	1.02666	0.906545	0.965287	1.06677	1.03453	1.09913	1.19037	0.874827	1.41598	1.3173	1.17096
5403.32	0.933923	0.787456	0.53759	0.738764	1.009	1.02894	0.707742	0.821142	1.05489	0.943246	0.925195	0.556448	1.29886	0.968196	0.524166	0.707655	1.10633	1.39625	0.753031	1.10918	0.771048	1.19113	0.855816	0.655288	0.669542	0.69871	0.664095	0.742299	1.2421	1.02366	0.69846	0.909214	1.15513	0.806824	1.34657	0.975145	0.565224	0.513548	0.837491	0.621404	0.936917	0.872253	0.930571	0.811005	0.883742	0.688346	0.940003	1.18696	0.826535
5518.09	0.777578	1.10243	1.08195	1.02375	0.914663	1.04015	0.930473	1.46316	0.953307	0.88762	0.916071	0.685873	1.3156	0.794329	1.1314	1.05426	1.33072	1.06216	0.707706	1.06377	0.87538	0.840141	1.22411	0.885748	0.768576	0.942595	0.768239	0.961118	1.25024	0.878945	0.978424	0.965595	0.802216	0.898834	1.06141	1.03459	0.771996	1.18838	0.884219	0.877418	1.27802	0.921217	1.01728	0.928752	0.889172	0.715407	0.79039	1.03972	0.961487
5819.11	0.841238	0.594207	0.460463	0.721937	0.701458	0.893278	0.681162	0.809337	0.641716	0.886252	0.926614	0.481964	0.966882	0.751215	0.745192	0.79389	1.09082	0.787879	0.781062	0.902467	0.638382	0.781835	0.600688	0.453602	0.632384	0.509127	0.828013	0.658595	0.914763	0.820279	0.728775	0.592916	0.887365	0.453172	0.816762	0.710154	0.491809	0.542397	0.805052	0.745991	0.690935	0.849189	0.726503	0.885722	0.866173	0.599292	0.810319	1.03686	0.990882
6428.82	46.5823	18.8334	55.6605	31.2106	40.7366	41.8978	25.6215	25.9532	51.3717	28.628	31.5148	17.6183	27.9101	72.1669	21.5694	23.8724	28.9911	25.7684	62.7849	33.4659	42.7333	62.5237	38.1516	41.8961	57.4832	24.2627	31.2932	25.0955	52.736	29.6488	39.1038	72.0224	46.775	33.4081	26.4694	33.0859	35.2085	31.879	49.3229	50.8567	15.8208	32.9303	39.928	53.511	25.3505	38.9671	34.8443	52.3996	36.9028
6451.01	4.74642	2.01529	4.52926	2.3526	6.05369	4.68749	2.24657	2.52239	3.82114	3.0623	2.0092	0.941911	3.80271	4.95043	1.99322	1.87605	3.23206	2.41979	5.31968	3.20673	3.33595	4.71315	3.87452	3.39836	4.11774	2.09116	2.08505	1.58228	5.19397	2.66313	2.62944	6.8037	3.65559	1.95886	2.85621	2.5731	2.26369	1.90099	4.01749	4.60388	1.18144	2.19051	2.19528	2.58019	1.82551	2.4371	2.42393	5.41053	2.75608
6472.62	2.57957	1.36343	2.8287	1.85036	3.59424	2.68758	1.73899	1.71056	2.68007	2.01012	1.45227	0.795188	2.47498	3.18952	1.4533	1.28713	2.15935	1.45618	3.06776	1.91541	1.88771	2.72622	2.40153	2.22079	2.40217	1.36241	1.53211	1.40356	3.35318	2.01946	2.10315	3.63553	2.21981	1.34935	1.88418	1.64779	1.55597	1.32793	2.29619	2.58617	1.11734	1.57713	1.47609	1.75017	1.38588	1.53475	1.61867	2.92872	1.73913
6494.82	1.69932	0.630162	1.10037	0.790579	1.95423	1.43166	0.862016	0.91	1.35703	1.10775	0.928128	0.651566	1.25505	0.974884	0.782955	0.770624	1.27885	0.859186	1.35836	1.03537	1.13659	1.43996	1.27197	0.906484	1.23615	0.719492	0.761376	0.788979	1.29782	1.10724	0.862637	1.72884	1.17434	0.705229	1.15776	0.95543	0.704793	0.668398	1.21761	1.28626	0.585458	1.02597	0.746326	0.922854	0.981741	0.787957	0.950501	1.62199	1.14407
6514.99	1.18383	0.910289	1.09086	0.942487	1.50761	1.17063	0.955684	1.02316	0.912597	0.815828	0.82809	0.632321	1.19109	0.882917	1.0752	0.791224	0.836001	0.900703	0.848355	0.834094	0.932749	1.38888	0.964719	1.00872	0.762639	0.824511	0.789226	0.769479	1.04222	1.10718	0.920268	1.06604	0.976269	0.832314	0.96223	0.711145	0.669396	0.86039	0.83246	0.983239	0.928787	0.720882	0.925838	0.910693	0.75469	0.852549	0.906003	0.980003	0.908581
6583.06	1.06325	0.618523	0.857402	0.620048	1.06909	0.878707	0.794734	0.960856	0.777052	0.805023	0.803553	0.672553	0.898668	0.885263	0.677317	0.967884	0.56493	0.614661	1.36898	0.82515	0.892814	1.18719	0.680917	0.701087	0.668828	0.767779	0.844346	0.568706	0.967271	1.12507	0.727217	0.868142	0.996656	0.755826	0.817171	0.813266	0.669938	0.53034	0.701528	0.949837	0.657714	0.653361	0.827087	0.948606	0.944527	0.648955	0.712271	0.953168	0.717519
6609.44	0.480476	0.510692	0.33501	0.423468	0.541619	0.542916	0.589776	0.547108	0.755716	0.384591	0.289223	0.0559082	0.468534	0.50609	0.391395	0.468575	0.472728	0.460175	0.180219	0.553485	0.316353	0.278005	0.536982	0.474986	0.395245	0.133843	0.182589	0.128232	0.3808	0.523474	0.403386	0.812188	0.557166	0.223626	0.414562	0.263409	0.108486	0.273754	0.330016	0.86291	0.208264	0.169553	0.180805	0.149022	0.442801	0.400512	0.38722	0.754598	0.405006
6626.92	98.2264	55.7041	101.88	85.2895	72.9278	66.1277	79.7888	80.8117	101.832	79.9654	105.073	72.3993	54.5271	133.346	60.2894	98.187	60.2615	62.7842	128.28	92.3158	93.292	105.716	76.9532	101.459	94.2725	65.7182	86.5234	78.5775	89.1048	66.3734	77.443	108.396	98.8011	86.5095	70.6039	86.237	76.5021	81.9494	101.423	107.09	54.643	98.0047	80.6366	111.31	68.5803	97.2728	86.1671	96.5147	71.4341
6649.37	12.7383	6.74986	10.671	8.83934	12.1162	8.44464	9.56739	10.2526	10.5362	9.74249	7.70405	5.9273	7.60636	12.2959	7.70352	10.8811	7.93882	7.04498	13.1409	10.8019	10.245	9.24004	9.816	11.2113	8.67274	7.19475	8.6194	7.58889	11.0242	7.91378	8.18468	12.2904	9.80844	6.61655	9.12299	7.12807	6.5017	5.72298	10.2986	13.4308	4.87297	9.9279	5.19702	8.58139	5.65552	8.64298	7.7291	12.4215	6.98323
6670.59	7.29864	3.87298	5.89781	4.79178	7.68892	4.9912	5.18066	5.59817	5.39388	5.35965	4.12559	3.32848	4.71489	6.31643	4.28829	6.03891	4.57535	3.81537	6.95298	6.15706	5.44676	4.93309	5.44106	6.10785	4.28949	4.08927	4.48844	3.94878	6.07292	4.94652	4.4319	6.14036	5.38404	4.05768	5.39371	4.18595	3.70732	3.07491	5.40335	6.86281	2.71572	5.08237	2.5823	4.55926	3.21383	3.9784	4.17553	6.59135	3.81932
6692.65	3.75286	1.95658	2.76719	2.31003	3.73383	2.60672	2.58907	2.68733	2.7521	2.59516	1.89483	1.74997	2.75044	3.07961	1.78024	2.63491	2.37848	2.12418	2.92204	2.94991	2.78491	2.09891	2.48247	2.87499	2.06122	2.13362	2.36737	1.89928	2.89337	2.37056	1.91203	3.02487	2.69601	1.86688	2.83188	2.08053	1.5109	1.53686	2.37324	3.07729	1.51381	2.56593	1.54596	2.28381	1.54566	2.17401	2.14904	3.68753	1.9755
6714.08	1.92028	1.22572	1.78845	1.41286	2.59477	1.86749	1.4963	1.79595	1.66425	2.07967	1.37373	0.962996	1.60344	1.69711	1.44638	1.58577	1.59409	1.31002	1.85164	2.13695	1.80535	1.80361	1.43197	1.86709	1.54229	1.45657	1.66901	1.2853	1.94141	1.68195	1.29291	1.79414	1.70275	1.0571	1.90956	1.42019	1.146	0.913047	1.6941	1.98923	0.996987	1.72131	1.02319	1.3574	1.00031	1.27281	1.55049	2.2951	1.39626
6736.58	1.5497	0.988138	1.23715	1.11179	1.62791	1.23778	0.973532	1.18874	0.775182	1.18259	0.844889	0.813908	1.42319	1.51598	0.693884	1.14457	1.2928	1.11545	1.38903	1.09217	1.0952	1.0647	1.14467	0.953651	1.0066	0.84978	0.970338	0.971396	1.22479	1.20707	0.913759	1.07181	1.2194	0.989846	1.44255	0.927258	0.740878	0.639108	1.30779	1.32941	0.739511	1.12342	0.813657	0.838952	0.856372	0.907816	0.762636	1.49617	0.880038
6757.96	1.29065	0.807738	0.7201	0.790248	1.37097	1.24456	0.889943	1.05099	0.914152	0.845381	0.78558	0.552582	1.00767	0.919477	0.76444	0.964682	0.824169	0.841484	0.921482	1.29441	1.07046	0.864874	1.11432	0.98994	0.79972	0.947642	0.757192	0.703419	0.953702	1.1339	0.820633	0.821778	0.884399	0.917887	1.18104	0.811132	0.753742	0.682154	0.892039	1.02712	0.770211	1.03307	0.710728	0.963856	0.791397	0.731177	0.790458	1.19541	0.751215
6833.06	4.61565	2.92676	4.42355	3.488	3.14949	3.16702	3.95811	4.41208	4.50758	4.41042	4.01741	2.61053	2.33542	6.52703	3.24497	4.78821	2.6123	2.67009	7.23995	4.76424	4.07011	4.36249	3.89533	4.63425	5.13039	2.85254	4.06122	3.47773	4.55219	2.51302	3.33715	6.09161	4.14762	3.82197	3.5613	3.674	3.69336	3.85152	4.13866	4.78011	2.80576	4.9423	3.58991	4.75453	2.99346	4.63084	3.38824	4.39732	2.81759
6853.84	1.98719	1.16624	2.73526	1.68898	1.48028	2.41868	1.51757	1.97398	2.53937	1.69683	1.90945	1.64944	1.16702	2.82826	1.32825	1.93358	1.4714	1.78731	2.53408	2.97219	1.70579	2.03316	2.20367	2.62661	1.76594	1.40631	1.77819	1.60158	1.94166	1.48576	2.08863	2.26119	2.50315	1.79255	1.87088	2.05889	1.60643	1.99281	2.23497	2.28911	1.1442	2.09648	1.44581	2.24621	1.67111	1.66863	2.40624	2.14914	1.763
6876.79	5.32672	5.30687	6.53993	7.46871	3.07981	9.91226	3.81782	6.19696	8.53901	7.45305	6.17421	6.20922	4.05987	13.6025	7.21632	7.83841	7.92007	6.67965	4.91261	10.3523	9.56619	6.5399	6.61929	8.6374	6.61371	5.02716	7.06323	9.50777	5.3091	6.40864	8.59858	8.26416	10.526	8.91353	4.88879	7.24498	6.66757	10.6307	5.98487	7.26199	4.99289	8.36806	4.29199	5.82598	5.31609	5.07061	10.7788	6.10148	7.56733
6888.48	0.757758	0.700358	0.633497	0.798023	1.19449	1.29922	0.687259	0.793362	0.790793	1.01565	0.645185	0.677885	0.759093	1.18304	0.652335	0.577318	1.0993	0.770858	0.681084	1.14574	0.872868	1.20317	1.01978	0.793184	0.474611	0.749402	0.788936	0.691945	0.802995	1.10599	0.739464	0.803378	1.25098	0.87272	0.986086	0.761208	0.513656	0.824274	0.986499	0.914044	0.628712	0.873851	0.56286	0.765552	0.772057	0.717359	0.803094	0.926269	0.892522
6899.02	0.741035	0.484963	0.71921	0.504173	0.565692	0.88892	0.502268	0.657413	0.595002	0.590246	0.776698	0.564737	0.74968	0.717007	0.590459	0.684593	0.545483	0.768493	0.600344	0.912934	0.814373	0.594854	0.806285	0.625573	0.529876	0.646746	0.46016	0.601893	0.650602	0.906328	0.643377	0.536542	0.853778	0.683404	0.799972	0.797134	0.526968	0.615203	0.932205	0.948376	0.578359	0.695848	0.667573	0.616383	0.677694	0.692065	0.80211	0.717908	0.743622
6936.4	5.75917	4.70905	8.39557	9.93437	2.50674	10.3948	4.8504	8.91253	8.01777	5.94341	6.33146	4.9047	4.01771	13.434	5.72394	6.55517	6.62652	3.98874	5.45223	8.4726	9.48404	6.32381	7.25576	8.96376	7.223	4.72553	7.7126	10.409	5.61203	5.47049	9.78856	5.48507	10.2689	9.80826	4.44937	5.43487	7.20059	11.0629	6.65373	6.65801	5.14235	8.99178	4.4581	6.58284	4.15366	7.2718	11.8498	6.89922	6.7453
6965.3	1.04606	0.973898	0.823084	1.02474	0.89576	1.33569	0.947029	1.18202	1.07068	0.960142	1.40354	1.29574	0.746282	1.56145	1.27196	1.51923	1.12033	0.785876	1.29475	1.77274	1.31183	1.09307	1.14228	1.18855	0.577716	1.03625	1.34794	1.13521	0.698151	1.31475	1.19779	1.36217	1.32431	1.45499	1.03545	0.853149	1.21941	1.04461	0.866339	1.14166	0.813803	1.6958	0.922499	1.00508	0.956709	0.875747	1.81686	0.948239	1.47354
6979.89	0.94337	0.987661	0.903448	1.01744	0.863257	1.281	0.621721	0.835071	0.860121	1.0744	0.976204	0.797682	0.806863	1.2346	0.798415	0.759371	0.946946	0.799884	0.718587	1.13474	0.900479	1.01672	1.03406	0.86928	0.936934	0.824271	0.802605	0.944496	0.740228	1.37262	0.819721	0.916934	1.53417	1.0852	0.816689	1.01257	0.628583	1.07842	0.97768	0.992231	0.815489	0.988244	0.765382	0.992186	0.93027	0.758456	1.17731	0.958964	0.893892
7039.82	0.763884	0.614385	0.905042	1.1954	0.849201	1.30663	0.898697	1.17347	0.784509	0.804995	1.14133	0.711613	1.07379	1.45057	1.02986	1.00496	0.94448	1.2047	0.989205	1.25589	1.04962	0.858232	0.965763	1.16421	0.698928	0.845413	0.824505	1.02664	0.861543	1.10529	1.00379	0.776312	1.1187	1.16552	1.0807	0.947971	0.707914	1.15046	0.87709	0.993566	0.802334	1.03786	0.744198	1.09384	1.12468	1.0697	1.07485	0.990853	0.914813
7559	1.56739	1.0352	1.28437	1.78433	0.863653	9.44411	2.07054	0.780955	1.02912	1.53863	1.73656	5.29474	0.990643	1.02293	1.35156	0.951328	0.988345	0.895893	1.97071	1.08632	3.64198	2.17137	2.98499	5.79013	2.27802	1.73741	0.923037	2.00039	0.477775	1.38367	1.99613	2.88624	2.72705	4.44989	0.876736	1.90464	2.48659	1.89627	2.34392	1.2191	0.994259	2.74572	1.82722	0.80205	1.23769	1.07867	1.7118	0.886238	0.846405
7928.87	1.82161	1.38231	1.35177	2.16751	0.977337	16.2878	5.52736	0.944796	1.39796	1.85963	1.72029	6.21821	1.22998	0.944627	1.96484	1.0885	1.46046	1.07193	2.15693	1.51144	5.04221	2.8132	4.36854	7.90116	3.34276	1.79007	1.20292	2.70851	1.24463	1.4559	2.66857	4.17617	3.31443	5.30006	1.06619	2.72071	3.7611	2.59442	2.67357	1.33362	1.33918	2.88735	2.72001	1.1131	1.55325	1.47853	2.11089	1.01023	1.03499
8198.98	8.6651	4.8664	12.2884	1.57714	11.0573	1.5741	7.19297	12.2941	2.79876	5.72991	1.2853	3.57199	8.81361	4.29515	21.4594	9.93818	7.48204	1.88357	12.9315	3.64402	2.95418	1.88453	7.24086	13.8008	21.569	4.98873	8.2744	2.02627	11.6233	2.01704	7.09598	10.5581	1.9728	3.03947	2.98885	3.11064	37.4698	14.3814	6.27236	7.70573	6.50766	3.25486	6.46438	2.04303	4.83144	5.32504	2.3618	3.94353	2.27286
8677.07	15.9074	2.20346	17.43	10.8798	10.6915	7.6864	10.8261	17.1735	10.7244	9.17581	6.2674	4.21525	4.91773	11.7087	8.28998	12.8753	14.4575	3.3226	8.81554	13.8946	8.9815	8.61854	16.0033	11.1463	8.38309	6.8232	10.5039	14.0076	14.1186	2.06235	10.9921	6.26869	6.97567	6.1967	7.39883	7.29176	7.00976	12.728	16.332	9.92197	4.11424	8.09962	10.9249	11.3298	8.28347	20.4723	26.7225	12.1062	8.44197
8758.86	7.97053	24.6197	21.4005	25.2258	13.8399	8.52737	18.4036	43.4857	17.9494	25.1824	6.42874	29.2163	21.0549	10.7811	44.4782	12.6547	29.2891	6.17316	12.9212	24.4879	18.5727	13.8409	23.7847	21.8757	39.873	26.3914	29.3621	34.8819	16.2315	6.53585	7.96272	7.996	7.9671	20.9903	4.61184	8.44544	45.0225	38.5407	8.79078	13.6452	44.8927	16.9239	13.0598	12.3484	12.9433	18.1345	31.7704	10.0079	8.65503
8781.49	1.32925	2.12885	1.66858	1.56724	2.20689	0.559513	1.55114	3.89259	1.66179	2.25487	0.536575	1.92632	2.43757	0.406047	4.80172	1.49908	3.59486	0.747256	1.01539	2.20595	1.46754	0.854556	2.51897	2.20911	2.60304	1.98192	2.19387	2.61463	1.62102	0.617354	0.569171	0.564397	0.688676	1.02723	0.716837	0.677091	3.70062	3.10896	1.08199	1.33019	3.04351	1.01335	0.847932	0.750543	1.1684	1.2994	2.49124	0.64145	0.636608
8804.08	26.4584	28.4584	33.9041	43.8678	22.7481	30.1512	52.6	30.5344	18.8319	19.6834	20.4174	13.814	10.4943	30.5643	22.7304	21.8367	10.4141	8.65354	15.9621	18.1476	30.0002	30.6437	26.7895	17.4897	31.2477	18.9625	30.2886	32.3885	25.3663	33.2344	42.9484	24.3842	23.183	29.4205	17.776	30.0439	32.3018	29.8611	17.9954	20.2644	31.2188	32.574	36.4785	29.3071	17.2723	35.2184	41.2074	28.3129	24.7657
8825.49	1.90387	2.71087	2.54113	3.03829	2.91945	0.997413	4.36088	2.19401	1.32395	1.52074	1.05049	1.19711	1.61858	0.433788	2.20455	1.67069	1.40797	0.690225	0.630544	1.14736	2.53345	1.61935	2.19505	1.43374	1.80264	1.61304	1.78385	1.5886	1.8314	2.80364	2.43823	0.627586	0.759606	1.34251	1.0101	1.67974	1.60177	1.28728	1.0218	1.44075	1.92251	0.868637	1.39174	0.787222	0.805609	1.64167	2.38798	1.84313	1.37526
8862.61	2.58902	3.61828	3.22959	3.35923	2.44465	2.43587	6.64463	2.86259	2.25683	2.72998	1.72833	2.59094	1.68892	2.42456	3.70952	2.74292	2.24365	0.813337	2.84043	2.87877	2.37679	1.99666	2.40932	2.36502	3.243	2.94067	3.42665	3.10283	2.40632	3.39892	2.83713	3.40019	1.29407	3.43153	3.0471	2.21464	4.21358	3.13617	1.61701	2.48478	3.09737	4.06289	4.42279	2.87162	2.40756	3.51678	3.84683	2.1965	2.42975
8908.95	114.49	153.139	110.296	81.4407	119.324	56.5543	126.385	123.916	108.026	124.285	53.7719	106.582	96.6393	83.1989	160.027	118.707	135.657	50.6632	97.1116	93.222	70.0739	51.3	90.6254	119.495	143.702	136.114	125.359	102.437	102.484	51.8602	108.152	130.081	48.7129	83.6552	93.5785	87.2411	174.579	117.704	87.8286	128.585	142.703	84.6845	96.8515	89.1966	116.091	126.299	89.2314	74.244	75.0552
8931.54	7.79011	12.4317	6.27009	5.82839	14.7295	3.7706	9.44668	7.62908	5.62523	8.27268	2.51022	5.6333	7.56966	3.05736	12.0115	7.66488	10.1544	3.20731	4.93856	5.71836	4.78947	2.42299	6.83897	8.61534	6.75585	9.73098	6.20775	4.75466	6.10876	3.72776	6.45895	5.52971	2.09784	3.8718	7.2451	4.63837	9.61972	5.77065	5.22278	9.97368	7.23854	4.46561	4.28143	3.80261	7.58359	5.88589	4.92386	4.58619	3.78562
8953.45	4.23359	6.85699	3.44581	2.51717	7.66014	1.37745	5.22792	4.52761	2.94002	4.71105	1.19454	2.89633	3.81027	1.73603	6.82576	4.03391	5.16813	1.63049	3.08808	3.07662	2.56221	1.17526	3.44404	4.43547	3.97269	4.81123	3.83168	2.53115	3.42522	1.74181	3.71603	3.97419	0.923781	2.64674	3.9557	2.45921	5.10262	2.8621	2.66621	5.36999	4.24751	2.06668	2.30107	2.02977	4.19638	2.84744	2.13526	2.23405	2.00329
8974.62	1.6535	2.22062	0.944782	0.796519	2.52927	0.813075	1.69376	1.58813	1.04612	1.58363	0.590902	0.705774	1.60314	0.748877	1.79754	1.06646	1.6427	0.815504	0.916789	1.2751	0.918676	0.756679	1.0744	1.37329	1.07481	1.32594	1.00094	0.895904	1.1514	0.890771	0.984442	1.40561	0.760173	0.918846	1.51582	0.792071	0.845352	0.848327	1.07973	1.46911	1.28414	0.805736	0.998258	0.951593	1.74049	1.15727	0.938066	1.17896	0.795475
9011.14	1.846	2.10644	1.81146	2.16219	1.72409	1.20453	3.67382	2.12019	1.31981	1.54025	0.975774	1.25916	1.05506	1.47056	1.57417	1.43664	0.562891	0.842219	0.961847	1.13232	1.78868	1.68123	1.41164	0.951118	1.98681	1.58135	1.94492	2.0247	1.75713	1.59851	2.75149	1.60233	1.43409	1.7864	1.73641	1.78066	2.08102	2.19799	1.19524	1.31765	2.21363	2.26819	2.38396	1.51382	0.976052	2.29653	2.38459	1.60314	1.48333
9123.86	10.3319	23.1319	11.0758	11.3257	7.56205	6.02929	12.5811	16.7487	9.52328	15.8454	7.75169	17.3566	10.242	6.21122	19.1974	16.0541	9.29194	12.8161	13.5372	12.2168	8.83851	3.52659	9.16098	10.6414	12.595	16.8636	14.7529	11.9144	11.5746	3.85225	12.2528	10.6412	5.60921	12.2294	8.25349	7.87705	16.6328	20.6304	7.36386	9.70074	18.6646	11.3393	11.1232	6.70605	10.6017	12.1581	9.59651	5.8793	8.214
9152.2	2.12587	4.94455	2.51213	2.90749	2.4501	1.19898	2.65545	2.8719	2.02209	3.13504	1.92654	3.31617	3.09691	1.4669	4.08396	3.33576	1.85548	3.41514	2.72746	2.79133	2.28984	0.881158	2.60574	1.77777	2.33896	3.81401	3.29415	2.56739	2.86428	1.42224	3.01183	1.65005	1.20807	2.88383	2.1549	2.21779	3.43166	4.60204	1.75841	2.13385	4.45831	2.62557	2.46691	1.5088	2.64671	2.2259	2.06965	1.68209	2.15616
9273.61	0.633073	1.41046	0.744208	0.627445	0.732998	0.492704	0.650776	1.6778	1.39646	2.66162	1.09782	1.67574	1.32014	0.483195	1.45781	0.956807	3.51881	1.28635	1.35703	1.39855	0.537737	0.548278	0.747568	0.868324	0.491382	2.66662	0.617992	0.605059	1.32595	0.519014	2.14298	0.878654	0.541821	0.873348	0.76062	0.695189	2.03081	1.46689	1.35627	0.638135	2.42558	0.690773	2.45887	0.949439	1.85353	0.576848	0.672655	0.623078	0.659621
9345.54	5.33659	6.30238	5.36991	2.94155	3.7537	1.08865	2.29018	10.4115	5.28812	7.25173	3.01572	7.21463	6.59588	1.61289	9.53946	7.11198	15.297	3.96382	8.70977	7.32453	2.7452	1.26676	5.13746	7.25353	3.40028	10.6126	5.39334	4.63833	6.9656	0.679823	4.27208	3.58342	1.34672	3.94557	3.03753	3.08021	4.88083	10.5347	6.06697	4.30643	5.17128	2.4816	3.33248	2.26086	6.49208	5.04444	5.57173	1.40501	2.80016
9351.8	5.14734	5.07433	3.77214	3.10332	3.11714	2.65171	2.97932	8.36793	5.08082	6.10376	2.63144	3.08796	6.30319	2.68271	7.79109	4.4988	11.9517	4.778	6.25539	6.24827	2.42823	1.89516	4.62295	4.74774	3.22583	5.13844	5.04364	4.18823	6.38773	0.821405	3.95687	3.57656	2.77298	2.99723	3.91186	2.49882	3.91596	7.92858	4.33175	3.84714	4.9932	3.45022	4.07767	3.10218	5.60788	4.73883	5.40669	2.67508	3.92291
9370.5	2.99569	6.07114	3.03559	3.50336	2.14085	1.14804	3.92695	3.9621	2.47911	3.68281	2.48798	4.48075	3.28768	1.66645	4.81946	3.58241	2.45311	3.12966	3.65647	2.56461	2.37856	1.14416	2.77705	2.76335	3.16336	4.1291	3.35123	3.40027	2.7776	1.125	3.07073	2.20292	1.21025	3.12737	2.57032	2.12937	4.51624	5.08746	2.58573	2.55283	4.8572	3.02763	2.93748	1.90327	3.11387	2.68159	2.42529	1.17059	2.23205
9415.36	66.6679	127.838	69.6478	78.8167	55.7054	44.7183	76.9748	91.8988	64.5351	91.8748	64.5063	100.284	68.2681	45.49	102.146	94.1645	54.4383	83.1547	79.4179	76.2701	60.0196	31.8906	59.3032	71.452	71.8669	96.4087	87.1857	74.2476	69.3891	33.7202	79.5417	64.8114	41.7429	82.9358	54.8808	55.3969	94.2204	109.924	53.4907	64.7619	105.887	71.6619	72.6679	51.7391	72.4406	70.9922	71.2505	42.5926	61.4752
9438.74	3.08973	5.52921	2.92275	3.69924	5.24371	1.01803	4.24191	2.3673	1.73033	3.23376	2.26603	3.48241	4.21997	1.34305	3.77406	3.85396	2.1227	3.56046	2.44183	2.63694	3.06712	1.10256	3.20056	3.41984	1.96436	4.18101	2.41182	2.06915	2.48362	2.37442	3.0609	1.41253	1.73517	2.64244	2.53697	2.38504	3.41764	3.43382	2.57724	3.32235	3.37641	2.07418	1.96804	1.55912	3.45184	1.7473	2.32415	1.57091	2.8244
9459.8	3.00383	7.65058	3.44219	4.25538	3.54767	2.61852	3.4509	3.35855	2.9655	4.99695	2.68327	4.32426	4.4558	1.65464	4.99047	4.14121	2.33456	4.87107	2.50471	4.10406	3.40237	1.49166	3.40266	3.88593	2.47773	5.28101	4.30672	2.57805	3.61573	1.62213	4.36864	2.5511	1.12993	3.35809	3.10107	1.70823	3.92626	3.61811	2.77202	2.93234	4.88611	3.56543	3.09418	2.02365	3.83019	2.68915	3.76653	2.27917	3.20474
9478.65	2.21087	4.14162	1.53935	3.0214	5.01648	0.807046	4.04191	4.30108	1.44709	2.3698	1.38677	2.20519	2.85104	0.573815	4.2071	5.26643	3.67285	2.71036	4.35854	2.05396	1.5363	0.664204	1.90324	1.92113	4.58008	2.8224	2.13954	2.53209	1.93236	3.01754	2.05392	0.777534	2.73919	2.79055	2.76477	2.36263	2.02488	3.63848	1.39797	3.15896	2.68641	1.17835	1.82268	0.742874	2.19159	4.01463	1.68838	0.926895	1.73706
9502.59	1.39784	2.69779	1.1562	1.43725	1.69467	0.873071	1.71764	1.65251	0.861295	1.90364	0.945798	1.38667	2.01414	0.626314	1.88692	1.7543	1.13801	1.81352	1.36859	1.36764	1.0552	0.63178	1.18901	1.30581	1.10776	1.76893	1.45774	1.34356	1.51901	1.11225	1.19533	0.644159	0.732506	1.26651	1.26519	1.02901	1.42998	1.57645	1.04286	1.05942	1.71052	1.04262	1.38063	0.58977	1.67397	1.18328	0.751719	0.827246	1.03955
9523.22	1.42164	2.50941	0.844473	1.26118	1.60855	0.969513	1.77808	1.5677	0.854138	1.57676	0.868143	1.31351	1.80104	0.587221	2.00833	1.44167	1.46045	1.65549	1.44155	1.05436	0.895662	0.649641	1.1824	1.01056	1.35343	1.3968	1.46521	1.05757	1.41686	0.865859	1.26221	0.762279	0.760987	1.18139	1.27314	0.965964	1.29841	1.61381	0.90521	0.885359	1.94779	1.07727	1.39828	0.791092	1.91371	1.13207	0.990349	0.847213	1.23775
9566.91	2.1795	3.14465	2.125	1.59452	1.99833	0.9677	2.2003	2.18976	2.19658	2.67461	1.77879	2.24369	2.60387	1.06829	2.32009	1.79015	2.69752	2.7082	1.72032	2.07714	1.3035	1.37893	1.91378	1.78637	2.09861	2.25324	1.59719	1.60961	2.19893	0.912091	3.12187	2.8094	0.999829	1.41721	2.56712	1.2228	2.69278	1.81741	1.82034	1.65942	4.62352	1.81919	3.50046	1.60789	3.5951	2.05406	1.86483	1.80062	2.00051
9621.96	3.24982	7.75911	3.19768	3.63947	2.38429	1.38074	4.55055	5.14867	2.83647	4.95325	2.59144	4.25561	2.4413	1.40721	5.72643	4.77026	1.8234	4.08284	4.16231	3.75759	2.78632	1.15399	1.99291	3.13934	3.99775	4.8028	4.48526	3.67696	2.65143	1.2973	4.17644	3.57163	2.01573	4.23446	3.01225	2.50397	4.7001	5.53182	1.72955	2.78971	5.94071	3.64748	3.63591	2.1503	3.39199	3.62144	3.10882	2.24719	2.85071
9637.96	4.27604	6.35181	7.23564	3.82886	3.85723	4.35894	4.1938	6.48103	3.88084	4.90925	3.55584	4.7803	8.72596	4.52193	6.02766	4.77922	6.76852	4.04985	4.98154	7.15916	4.46848	2.1325	8.72725	6.70582	3.70747	5.43349	8.46731	4.95719	8.04099	1.5611	4.38732	3.63533	2.19606	3.87919	3.9603	3.32244	4.34518	6.78763	3.43545	3.14837	5.15497	3.83417	4.68623	2.6325	6.76623	4.37826	4.2774	2.93146	2.76448
9664.07	1.6998	2.0927	1.94408	1.43187	1.53114	1.1955	2.1894	1.38256	0.903249	1.75656	1.04786	1.64935	2.34527	1.33531	1.78951	1.31138	0.861308	1.48821	0.895484	1.18335	1.39188	1.21645	2.1992	1.60514	1.87863	1.91905	2.04389	1.86986	1.6346	1.18052	1.7944	1.37697	1.20421	1.10134	1.97965	1.87566	2.47596	1.73048	1.13687	1.46854	2.02479	1.35941	2.12968	1.14638	2.39278	1.47302	1.50687	1.26312	1.1741
9706.91	20.2147	22.2564	23.8241	17.5923	18.3495	13.9803	23.9106	17.5314	13.173	12.0962	17.4984	14.1059	26.359	17.3831	17.6914	15.3339	12.4701	17.0894	13.5738	13.1906	14.6558	13.737	23.2679	16.4267	19.5462	15.6122	21.7642	26.7069	24.1403	13.0734	20.964	18.8992	16.9786	12.0522	18.1407	24.1174	17.5508	24.49	9.90611	12.2703	20.5501	16.8222	27.4026	15.8032	28.842	16.6846	15.1984	19.6496	14.9085
9912.72	1.36545	1.45074	1.3796	0.994884	1.05123	0.846645	2.12651	1.33722	0.810261	0.832198	0.785209	0.736594	1.89333	0.857396	1.31739	0.920941	1.07776	0.919732	1.12221	1.08373	0.683957	0.722088	1.2865	0.870232	1.42708	0.925942	1.23428	1.44859	1.38763	0.632333	0.925061	0.737498	1.03861	0.921359	1.1722	1.53003	0.801281	1.83462	0.49301	0.734843	1.35749	1.06302	1.3471	0.662493	1.52334	1.06296	0.707764	1.0624	0.979712
9927.66	0.767265	5.85054	1.0336	0.568793	0.737153	0.805779	0.814569	0.972852	0.551269	5.35892	5.8786	6.0638	1.74274	0.821505	0.792681	0.466715	0.515347	3.86107	0.621496	1.08565	0.919922	0.542474	1.98911	1.14637	0.650016	4.99594	1.84067	0.918263	1.56857	0.593115	5.21259	3.96311	0.538809	0.560228	0.825004	0.8071	6.02435	0.769352	2.2197	0.421054	6.32013	0.7569	6.70547	2.83549	5.63117	0.724589	0.571109	0.679954	0.642374
13749.5	1.77652	2.38397	5.17928	6.96898	7.9465	2.42592	1.64285	3.00431	3.74715	5.13175	5.90296	9.36893	2.32141	5.43497	2.38958	6.46137	4.78635	6.09022	3.689	7.55295	8.52303	4.92511	3.06036	5.29712	2.9415	5.62589	5.96015	7.21531	2.84669	3.30896	3.21544	2.37291	7.98282	12.9546	3.73003	12.1608	5.88103	4.88011	3.64729	4.44204	2.9348	6.43023	3.25072	6.06325	3.18543	1.78722	3.77883	2.2946	6.38472
13761	13.0009	11.2651	15.9304	23.6501	6.49706	20.057	7.4288	8.01875	21.0052	17.148	21.7536	28.6856	9.9025	28.9778	12.0676	18.3996	20.0295	20.9603	14.2723	21.2042	27.5685	26.5355	13.9715	18.074	16.4793	17.3231	18.1682	25.9663	12.5852	22.5117	21.2684	14.2669	30.4837	30.9367	13.8808	31.752	20.3675	24.5036	21.0625	17.1873	14.7028	24.7636	15.2727	23.8417	17.9818	14.123	25.0285	12.2467	25.335
13870.7	2.63968	3.16121	8.72688	11.0062	6.93656	3.45545	3.37646	4.76041	4.63309	5.13518	10.7643	10.001	3.97335	5.94163	2.59205	6.86852	4.78504	5.79977	6.25821	6.92528	9.76532	7.00098	4.33552	6.76308	4.05882	7.75358	7.60313	8.64572	4.71853	4.84071	5.0233	2.50011	9.42415	16.2728	5.13561	12.1795	8.09427	5.41422	6.02609	5.28951	5.23794	9.14464	5.06983	8.86513	4.1135	3.80191	5.20826	3.70719	8.17271
13881.8	14.6897	12.6683	24.2599	31.3814	8.11117	23.908	12.4305	13.8028	21.7752	15.5371	29.6795	24.9999	13.6886	30.5072	12.2221	18.257	18.5172	15.9399	18.8234	20.1617	30.1877	27.9535	19.2566	21.2429	20.3253	19.6177	21.4929	28.3035	16.7976	22.954	26.3567	11.422	33.4541	36.4908	16.2736	27.1931	23.8488	27.3379	27.7011	19.9976	20.2103	28.394	18.6047	26.6459	16.0601	24.8198	30.0671	16.4795	25.6696
13929.1	0.988525	0.863319	1.47985	1.93286	1.29469	1.31592	1.12074	0.614003	1.47862	1.3188	2.23908	3.2157	1.34045	0.990379	0.935112	2.06623	1.17901	1.57653	2.02542	2.24001	2.51667	2.01333	1.29699	1.73647	0.737877	2.16953	1.72934	1.51203	1.1242	2.27735	1.12182	0.874256	2.12935	4.05605	1.63036	2.61019	1.93879	1.14134	1.80405	1.53585	1.22193	2.15777	1.49948	2.11703	1.45397	1.02144	1.29116	1.02936	2.36926
13939.2	2.25584	1.98241	3.71417	4.17221	1.51096	3.40713	2.20947	1.60228	3.25303	3.22701	4.08274	6.22855	2.09907	4.16392	2.05079	3.57539	3.30873	2.17429	4.25548	5.00369	4.92276	3.36596	2.53956	3.66889	2.63424	4.2009	3.50709	4.28595	2.19272	4.44554	3.33061	2.2338	3.99045	7.62437	3.70722	3.99195	4.48161	3.74459	3.45761	3.73634	2.57283	5.32504	3.10392	4.72454	2.75387	3.07512	4.87772	2.20751	4.72914
13969.8	1.30341	1.05948	1.06613	1.49291	1.5649	1.66688	0.75673	0.820809	1.50198	1.26251	1.54656	1.70595	1.52813	1.44672	0.989183	1.65606	2.11755	2.29647	1.26444	1.72067	2.06489	2.10421	1.59257	1.17816	0.981786	1.24939	1.39955	1.95615	1.22619	1.71982	1.16009	0.969936	2.4712	2.12796	1.6066	2.12212	1.20416	1.42348	1.91115	1.31126	1.21587	1.68676	1.2771	1.67897	1.48054	1.10315	1.13066	1.3178	2.09573
14035.3	2.13072	1.84691	1.02283	3.39291	2.79227	1.79678	2.36696	0.925017	2.05246	2.6535	3.57757	3.2787	4.6163	1.57703	1.67674	2.87896	2.43804	5.41075	3.25633	3.1493	2.696	3.3112	2.42866	1.66838	1.67331	4.11271	3.88943	2.84279	3.34644	1.49751	2.07278	1.49349	4.22528	4.03821	4.89593	7.64448	3.22283	1.43031	3.01022	1.90688	3.9744	3.28305	5.43257	6.20896	3.69618	1.75375	2.0297	2.59918	5.94621
14043.8	7.45444	5.51513	3.01759	6.72631	6.95411	9.11381	7.09476	2.89324	8.48407	7.04314	6.16065	5.36892	12.423	7.68641	6.8961	5.77757	7.41701	11.0848	6.34726	8.16287	5.44593	7.4886	7.38162	4.24029	5.90453	6.16009	9.17267	7.4656	10.2778	3.52679	8.49068	6.52874	10.7631	6.55994	10.1442	10.6974	7.03347	5.47967	6.36856	5.20062	9.06541	7.69757	11.4526	11.6284	9.00647	6.41685	9.19454	8.64872	13.193
14083.5	0.729154	0.597412	1.01487	1.52599	1.07893	1.35635	0.850869	0.755059	1.0879	1.09423	1.88015	1.20625	1.32359	1.06261	0.642387	1.20972	1.22009	1.34646	0.981689	1.33411	1.74339	1.35637	1.29501	1.0538	0.771274	1.37533	1.00035	1.10367	0.954151	0.956197	0.983502	0.721722	1.59999	2.21758	1.40824	1.78109	0.871125	1.06789	1.25004	0.993096	0.982907	1.52192	1.30527	1.8755	1.31167	0.985239	1.11732	1.09158	1.38116
14091.6	1.36207	1.13669	1.67118	2.7118	1.30078	1.96369	1.45306	1.38664	2.22165	1.83196	2.8289	1.70452	1.91153	2.8674	1.20293	1.35959	2.40021	2.07288	1.38262	2.05879	2.36398	2.20262	2.25954	1.5054	1.70581	1.86311	1.96528	2.18603	1.86519	1.33234	2.3976	1.46116	3.22708	3.08974	1.85426	1.94194	1.68822	2.44024	2.02316	1.53348	1.8166	2.42561	1.9992	3.05693	1.95242	2.036	2.78336	2.09421	2.39532
14139.2	0.969381	0.677424	0.81275	0.8975	1.02073	1.31045	0.885497	0.71411	0.96986	1.17345	1.00338	1.03164	1.6709	1.0622	0.981777	1.03665	1.10754	1.63201	1.10197	1.45815	1.0558	1.12851	1.20505	0.656827	0.752533	1.21136	1.11064	1.09314	1.09046	1.0796	0.836421	0.826978	1.70062	1.6679	1.68857	1.75808	0.846456	0.63815	0.942396	0.943401	1.15553	1.2496	1.30139	1.5657	1.17724	0.892939	0.826275	1.30128	1.71179
14149.5	2.02671	1.52674	1.55972	1.66855	1.62597	2.90281	1.54619	1.36705	2.4925	2.17664	1.45088	1.62702	3.11922	2.57654	2.03717	1.75344	2.43352	2.93939	1.78326	2.79178	1.67684	2.03177	2.14325	1.18967	1.64247	1.58776	2.61905	2.21125	2.84465	1.40671	1.78598	1.90203	3.26494	2.32906	2.92816	2.26649	1.89907	1.63324	1.51965	1.38331	2.3994	2.35966	2.57456	2.50524	2.05344	1.75776	2.77854	2.3034	3.44717
15124.3	1.74262	0.926184	1.18291	3.31283	0.393292	15.2981	2.70858	0.245208	0.581697	2.00596	1.9349	18.289	0.511371	0.479719	1.31927	0.414567	0.622498	0.471927	3.34295	0.767948	8.98171	4.34118	5.44463	10.2039	4.61072	3.25594	1.46221	3.8563	0.27125	1.56721	3.00509	3.74521	5.30363	12.8035	0.693477	5.67736	6.256	3.23036	4.99002	1.55966	1.57152	5.79662	3.73448	0.680064	1.402	1.37936	2.01444	0.410173	0.541532
15867.9	1.68809	0.975061	1.00449	2.91377	0.300521	16.7584	6.08521	0.19673	0.324668	1.99707	1.75838	15.0159	0.504887	0.318882	1.56023	0.398746	0.586938	0.383234	2.72594	0.587886	8.9203	4.17708	5.79285	9.34514	4.82209	3.24889	1.26564	3.84314	0.472958	0.688248	3.43962	4.01607	4.80556	10.5612	0.50424	5.78305	6.54694	3.46445	4.51251	1.22378	1.5726	5.56772	5.12472	0.538627	1.51213	1.37749	2.17181	0.301016	0.418773
28194.8	2.72837	2.34619	2.55193	2.66576	2.69657	4.16149	3.14415	2.23352	3.1465	3.03697	2.41529	1.09297	4.85314	3.47373	3.03805	2.24656	3.30341	4.24948	2.68842	3.45679	1.91676	2.57309	3.33641	1.5282	2.20865	1.34966	3.65468	3.32404	4.14286	2.70607	3.32309	2.6616	3.94654	1.82158	4.62663	2.83614	2.47001	2.45838	2.18846	2.15435	3.29415	3.33386	5.42013	4.35925	3.8315	3.19225	3.993	3.33171	4.71145
[truncated: 331 more columns]
